# Supplementary material for: Factors influencing participation in physical activity for persons living with dementia in rural and northern communities in Canada: a qualitative study
Source: PubMed Central journal article supplement — BMJ Open. 2022 Jun 16;12(6):e060860. doi: 10.1136/bmjopen-2022-060860 (PMC9207915; doi:10.1136/bmjopen-2022-060860), 2022-06-16
Supplement: bmjopen-2022-060860.draft_revisions.pdf [file bmjopen-2022-060860.draft_revisions.pdf]

# BMJ Open

BMJ Open is committed to open peer review. As part of this commitment we make the peer review history of every article we publish publicly available.

When an article is published we post the peer reviewers' comments and the authors' responses online. We also post the versions of the paper that were used during peer review. These are the versions that the peer review comments apply to.

The versions of the paper that follow are the versions that were submitted during the peer review process. They are not the versions of record or the final published versions. They should not be cited or distributed as the published version of this manuscript.

BMJ Open is an open access journal and the full, final, typeset and author-corrected version of record of the manuscript is available on our site with no access controls, subscription charges or pay-per-view fees (<http://bmjopen.bmj.com>).

If you have any questions on BMJ Open's open peer review process please email [info.bmjopen@bmj.com](mailto:info.bmjopen@bmj.com)

# BMJ Open

## Factors influencing participation in physical activity for persons living with dementia in rural and northern communities: A qualitative study

|                               |                                                                                                                                                                                                                                                                                                                                                                                                    |
|-------------------------------|----------------------------------------------------------------------------------------------------------------------------------------------------------------------------------------------------------------------------------------------------------------------------------------------------------------------------------------------------------------------------------------------------|
| Journal:                      | <i>BMJ Open</i>                                                                                                                                                                                                                                                                                                                                                                                    |
| Manuscript ID                 | bmjopen-2022-060860                                                                                                                                                                                                                                                                                                                                                                                |
| Article Type:                 | Original research                                                                                                                                                                                                                                                                                                                                                                                  |
| Date Submitted by the Author: | 15-Jan-2022                                                                                                                                                                                                                                                                                                                                                                                        |
| Complete List of Authors:     | Freeman, Shannon; University of Northern British Columbia, Nursing<br>Pelletier, Chelsea; University of Northern British Columbia<br>Ward, Kristin; University of Northern British Columbia<br>Bechard, Lauren; University of Waterloo<br>Regan, Kayla; University of Waterloo<br>somani, salima; University of Northern British Columbia<br>Middleton, Laura; University of Waterloo, Kinesiology |
| Keywords:                     | Dementia < NEUROLOGY, GERIATRIC MEDICINE, HEALTH SERVICES ADMINISTRATION & MANAGEMENT, Quality in health care < HEALTH SERVICES ADMINISTRATION & MANAGEMENT, PUBLIC HEALTH, QUALITATIVE RESEARCH                                                                                                                                                                                                   |
|                               |                                                                                                                                                                                                                                                                                                                                                                                                    |

SCHOLARONE™  
Manuscripts

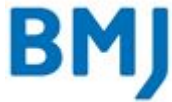

I, the Submitting Author has the right to grant and does grant on behalf of all authors of the Work (as defined in the below author licence), an exclusive licence and/or a non-exclusive licence for contributions from authors who are: i) UK Crown employees; ii) where BMJ has agreed a CC-BY licence shall apply, and/or iii) in accordance with the terms applicable for US Federal Government officers or employees acting as part of their official duties; on a worldwide, perpetual, irrevocable, royalty-free basis to BMJ Publishing Group Ltd ("BMJ") its licensees and where the relevant Journal is co-owned by BMJ to the co-owners of the Journal, to publish the Work in this journal and any other BMJ products and to exploit all rights, as set out in our [licence](#).

The Submitting Author accepts and understands that any supply made under these terms is made by BMJ to the Submitting Author unless you are acting as an employee on behalf of your employer or a postgraduate student of an affiliated institution which is paying any applicable article publishing charge ("APC") for Open Access articles. Where the Submitting Author wishes to make the Work available on an Open Access basis (and intends to pay the relevant APC), the terms of reuse of such Open Access shall be governed by a Creative Commons licence – details of these licences and which [Creative Commons](#) licence will apply to this Work are set out in our licence referred to above.

Other than as permitted in any relevant BMJ Author's Self Archiving Policies, I confirm this Work has not been accepted for publication elsewhere, is not being considered for publication elsewhere and does not duplicate material already published. I confirm all authors consent to publication of this Work and authorise the granting of this licence.

1  
2  
3  
4 **Factors influencing participation in physical activity for persons living with dementia in**  
5 **rural and northern communities: A qualitative study**  
6  
7

8  
9 Freeman S, Pelletier C, Ward K, Bechard L, Regan, K, Somani S, and Middleton L.  
10

11  
12  
13 Corresponding Author:  
14

15  
16 Dr. Shannon Freeman  
17 Associate Professor, School of Nursing  
18 University of Northern British Columbia  
19 3333 University Way  
20 Prince George, BC  
21 V2N 4Z9  
22 Canada  
23 e-mail: [shannon.freeman@unbc.ca](mailto:shannon.freeman@unbc.ca)  
24  
25  
26  
27  
28  
29  
30  
31  
32  
33  
34  
35  
36  
37  
38  
39  
40  
41  
42  
43  
44  
45  
46  
47  
48  
49  
50  
51  
52  
53  
54  
55  
56  
57  
58  
59  
60

## Abstract

**Objective:** In recognition that engagement in physical activities and exercise for persons living with dementia can be challenging in rural and northern communities, the objective of this study was to explore the factors influencing physical activity participation among persons living with dementia in rural/northern communities and identified locally-driven mitigation strategies used to address barriers to physical activity.

**Setting:** Interviews and focus groups were conducted in two locations in northern British Columbia Canada including a rural community (population less than 10,000 persons) and a medium sized geographically isolated city (population less than 80,000 persons).

**Participants:** Twenty-nine individuals participated including healthcare providers (n=8), community exercise professionals (n=12), persons living with dementia (n=4), and care partners (n=5).

**Results:** Rural and northern contextual factors including aspects of the built and natural environment were the main drivers of physical activity for persons living with dementia. Limited capacity in the health system to support physical activity due to a lack of referrals, poor communication mechanisms, and limited resources for programming created challenges for physical activity participation. At the community level, local champions filled gaps in physical activity programming, organizing social and exercise activities by leveraging informal networks. Program level factors included a lack of consistency in staff, and challenges defining program scope given limited population size and the fear of stigma for persons living with dementia.

**Conclusions:** Rural and northern communities were resilient in providing physical activity opportunities yet remained fragile due to human resource challenges. Without reliable resources and sustained support from the health system, these champions remained vulnerable to burnout.

1  
2  
3 Enhancing support for local champions through accessible training and mentoring may provide  
4  
5 greater stability and support a bottom-up approach to physical activity promotion for rural and  
6  
7 northern communities.  
8  
9

### 10 11 **Strengths and limitations of this study:** 12

- 13  
14 • This study described existing deficits in health system support for physical activity  
15 participation for persons living with dementia as well as substantial gaps in tailored exercise  
16 program offerings and knowledge necessary to provide accessible, inclusive opportunities  
17 for physical activity  
18
- 19 • In response to the challenges at the systems level, the community-driven solutions  
20 developed to address existing gaps in available services and supports relied on a limited  
21 number of community champions to provide physical activity programming.  
22
- 23 • Community-specific initiatives were organically tailored to address the needs of persons  
24 living with dementia in their community with conscious consideration of the environmental  
25 context and finite human and financial resources.  
26
- 27 • Although participants living with dementia or mild cognitive impairment were included in  
28 this study, we had a greater number of allied health providers and healthcare professionals.  
29 While these participants can provide a broad reflection on the challenges facing persons  
30 living with dementia from engaging in physical activity, it limited the ability to comment  
31 specifically on individual-level factors and the lived experiences of persons living with  
32 dementia and their care partners in northern and rural communities.  
33
- 34 • This study was conducted prior to the COVID-19 pandemic therefore it is unknown how  
35 pandemic restrictions and social distancing protocols have impacted the ability of persons  
36 with dementia to engage in physical activity  
37

38 **Keywords:** Physical activity, exercise, dementia, cognitive impairment, rural health,  
39

40 Alzheimer's disease, social ecological model  
41  
42  
43  
44  
45  
46  
47  
48  
49  
50  
51  
52  
53  
54  
55  
56  
57  
58  
59  
60

## INTRODUCTION

Dementia is an umbrella term used to describe progressive declines in cognition which may affect a person's behaviour and ability to perform activities of daily living. The most common form of dementia is Alzheimer's disease. More than 55 million persons are currently living with dementia worldwide.[1] Due to a rapidly aging population, it is projected that this number will rise to 78 million persons in 2030 and 139 million persons in 2050.[1] As there is currently no cure for dementia, there is growing urgency to develop and implement strategies to support the well-being of persons living with dementia and their care partners.

Physical activity is one of the best non-pharmacological strategies to support persons living with dementia to remain active and enhance quality of life.[2,3] For older adults living with dementia or mild cognitive impairment, which includes declines in memory, attention, and cognitive functioning that exceed that typically expected by age or educational level, physical activity can enhance and help maintain physical fitness, balance, mobility, functional ability, and cognition.[4,5,6,7] In addition to physical and cognitive benefits, physical activity has broader impacts including social inclusion and feelings of purpose, that contribute to overall well-being and quality of life.[8,9] Barriers that can prevent persons living with dementia from engaging in physical activity commonly include stigma and lack of knowledge associated with dementia.[10] When compared to age-matched controls, persons living with dementia were found to spend more of their time engaged in sedentary behaviours[11] and were less likely to meet physical activity guidelines.[12]

Despite the well-known benefits of physical activity, there remains a need to develop physical activity interventions for persons living with dementia that address systems-level (e.g., integration with health system) and individual-level barriers.[13] When using a social-ecological

1  
2  
3 lens, it is important to consider how policy, community, organizational, interpersonal, and  
4 individual factors influence physical activity behaviour for persons living with dementia.[14,15]  
5  
6 For persons living with dementia, issues affecting memory, declines in cognitive abilities, and  
7  
8 changes in mobility may impact physical activity behaviours differently across the course of the  
9  
10 illness.[16,17,18] The barriers to engagement in physical activity are amplified by the stigma  
11  
12 surrounding diagnosis of dementia and lack of knowledge by exercise providers on how to  
13  
14 accommodate and adapt programming for varying and dynamic needs.[8] Care partners are  
15  
16 uniquely positioned to raise awareness about factors influencing the behaviours and choices of  
17  
18 persons living with dementia. The sharing of this person-specific knowledge with physical  
19  
20 activity providers may inform intervention development and allow for tailoring of the program  
21  
22 by healthcare professionals and allied health providers to better meet the individual needs of  
23  
24 persons living with dementia.[18,19] Taking a systems approach to physical activity promotion,  
25  
26 exercise providers and allied health care providers who are aware of the unique needs of persons  
27  
28 living dementia can be crucial enablers of physical activity for older adults.[8,19]  
29  
30  
31  
32  
33  
34

35 Prior research exploring physical activity barriers and opportunities for persons living  
36  
37 with dementia has often focused on individual-level factors, with limited attention to  
38  
39 environmental and community-specific factors affecting the inclusion of rural-dwelling persons  
40  
41 living with dementia in physical activities[15,18] Although there is no clear consensus on what  
42  
43 constitutes a rural community,[20] common definitions are based on a combination of population  
44  
45 size, distance from an urban centre, and access to services. In Canada, the provincial “north” is a  
46  
47 term commonly used to identify the northern and more sparsely populated (e.g., rural, remote)  
48  
49 areas which may also experience similarities in arctic/subarctic climates, political  
50  
51 marginalization, economic dependency on natural resource development, and larger proportions  
52  
53  
54  
55  
56  
57  
58  
59  
60



1  
2  
3 of Indigenous populations.[21] Persons living in rural and northern communities face increased  
4  
5 barriers to physical activity (e.g., transportation, snow/ice) and have fewer opportunities to  
6  
7 engage in physical activity through specialized programming,[22] contributing to an increased  
8  
9 risk of noncommunicable disease and disability compared to their urban counterparts. As  
10  
11 northern and rural communities have a relatively greater proportion of older adults and a  
12  
13 population that is aging faster than the general population,[23] the need to develop strategies to  
14  
15 address context-specific barriers is urgent.  
16  
17

18  
19 Therefore, the objectives of this study were to: 1) explore the factors influencing physical  
20  
21 activity participation among persons living with dementia or mild cognitive impairment in rural  
22  
23 and northern communities, and 2) identify locally-driven solutions to salient barriers to assist in  
24  
25 the development of tools and resources for persons living with dementia, their care partners,  
26  
27 allied health providers, and healthcare professionals in rural and northern communities.  
28  
29  
30  
31  
32

## 33 **METHODS**

34  
35 **Patient and Public Involvement:** This work was guided by a large stakeholder advisory team  
36  
37 including persons with dementia, care partners, physical activity providers, researchers, and  
38  
39 health care experts. This advisory team provided direction to the research team which was used  
40  
41 to inform design and guide this work.  
42  
43

44  
45 **Study Context:** This study was nested within a larger national project aimed at developing  
46  
47 resources and materials to support Dementia-Inclusive Choices for Exercise (DICE) project  
48  
49 ([www.dementiaexercise.com](http://www.dementiaexercise.com)).[19,24] We report on the formative work conducted in northern  
50  
51 British Columbia, Canada, highlighting the perspectives of those living in rural and northern  
52  
53 geographies. Framed by a social ecological approach to understanding physical activity,  
54  
55  
56  
57  
58  
59

1  
2  
3 opportunities for persons living with dementia are informed by interpersonal, intrapersonal,  
4 social and built environmental, and policy factors.[14] Thus, it is important to co-create  
5 knowledge with diverse communities based on population size and geographical location,  
6 aligning with basic principles of patient-oriented research.[25] Interviews and focus groups were  
7 conducted in two locations in northern British Columbia Canada; a rural community (population  
8 less than 10,000 persons) and a medium sized geographically isolated city (population less than  
9 80,000 persons). Both communities are considered rural based on distance from urban centre and  
10 access to health services.[26]

11  
12  
13  
14  
15  
16  
17  
18  
19  
20  
21 **Participant Recruitment:** Purposive and snowball sampling strategies were employed to recruit  
22 exercise providers, allied health providers, persons living with dementia or mild cognitive  
23 impairment, and care partners for persons living with dementia. Purposive non-probability  
24 sampling, commonly used in qualitative studies, allowed for the invitation of participants who  
25 were most representative or informative to participate.[27] Recruitment materials were initially  
26 shared in community locations (e.g., posters placed on notice boards at the Alzheimer Society  
27 and in a local memory clinic; notice placed in community newsletter) to recruit persons living  
28 with dementia and their family care partners. Local health systems stakeholders assisted in  
29 recruitment of healthcare professionals and exercise providers who delivered exercise programs  
30 for older adults and/or persons living with dementia (e.g., rehabilitation programs, geriatric  
31 outreach programs, community exercise programs).

32  
33  
34  
35  
36  
37  
38  
39  
40  
41  
42  
43  
44  
45  
46  
47  
48  
49  
50  
51  
52  
53  
54  
55  
56  
57  
58  
59  
60  
Seven semi-structured focus groups and one interview were conducted with twenty-nine  
participants, including: healthcare professionals (e.g., physiotherapists, rehabilitation assistants,  
registered nurses; n=8); allied health providers experienced in providing community exercise  
programs (n=12); persons living with mild to moderate dementia or cognitive impairment (n=4);

1  
2  
3 and care partners of persons living with dementia or cognitive impairment (n=5). Four focus  
4  
5 groups involved both healthcare professionals and allied health providers, one focus group  
6  
7 involved both care partners and a person living with dementia, one focus group involved only  
8  
9 persons with dementia, and one focus group involved only care partners. The interview was  
10  
11 conducted with a person living with dementia unable to participate in a focus group setting.  
12  
13 Participant age and gender were not collected to protect participant confidentiality especially  
14  
15 given the relatively small number of healthcare professionals and allied health providers in this  
16  
17 region. Focus groups lasted approximately two hours for healthcare professionals and allied  
18  
19 health providers and approximately one hour for care partners and/or persons living with  
20  
21 dementia or cognitive impairment. Participants provided informed written consent/assent ahead  
22  
23 of the session date and reconfirmed verbal consent/assent prior to the session commencing. All  
24  
25 participants living with dementia were deemed to have the capacity to provide consent which  
26  
27 was reconfirmed by their care partners. Harmonized ethics approval was received for this study  
28  
29 from the University of Northern British Columbia and University of British Columbia (H18-  
30  
31 00392).

32  
33 **Focus Group Sessions:** Focus group sessions, tailored to the participant type, followed a semi-  
34  
35 structured guide based on previous iterations used by the research team.[24] The focus groups  
36  
37 were facilitated by an experienced moderator (SF) with support from a research assistant who  
38  
39 took notes and managed recording devices. The semi-structured approach allowed probing into  
40  
41 emerging issues and themes, where appropriate. Focus groups enabled exploration of interactive  
42  
43 social contexts and provided insight on participant perspectives and attitudes.[28,29] Group  
44  
45 processes helped participants identify and clarify their perspectives with each other and  
46  
47  
48  
49  
50  
51  
52  
53  
54  
55  
56  
57  
58  
59  
60

1  
2  
3 encouraged increased depth of description and discussion among participants, providing more  
4  
5 detailed responses to prompts.[30]  
6

7 **Data Analysis:** An inductive thematic analysis of transcripts was used guided by Braun and  
8  
9 Clarke's six steps.[31,32] Beginning with familiarization of the data, researchers read and reread  
10  
11 the transcripts, writing initial thoughts from the data (step 1). To capture broad perspectives on  
12  
13 the data, researchers independently identified and coded the transcripts (step 2) and developed  
14  
15 initial themes by identifying patterns in the data set (step 3). Initial themes were then discussed  
16  
17 as a group to develop rich descriptions and definitions using a white board to map connections  
18  
19 between ideas (step 4). Final themes were established and defined, with sub-themes generated as  
20  
21 appropriate within each overall theme (step 5). Data extracts (quotes), identified to best describe  
22  
23 each theme/subtheme, are presented with a narrative summary (step 6).  
24  
25  
26  
27  
28

29 Using the social ecological model as a guide,[14,33] themes were deductively mapped using a  
30  
31 white board and post-it notes and plotted according to user, program, health system, and broader  
32  
33 community (contextual) levels to describe the factors influencing physical activity for persons  
34  
35 living with dementia. Locally driven mitigation strategies and solutions described by participants  
36  
37 to overcome barriers to physical activity were identified across each of the four levels. Analysis  
38  
39 was conducted using Microsoft Word and Excel software.  
40  
41  
42  
43  
44  
45  
46  
47  
48  
49  
50  
51  
52  
53  
54  
55  
56  
57  
58  
59  
60

## RESULTS

Factors influencing participation in physical activity for persons living with dementia were organized into four themes according to the social ecological model: Northern and rural context, health system, physical activity programming, and program participant level (Figure 1). Identified challenges and mitigations strategies were also mapped to the social ecological model (Table 1).

### **Unique features of the Northern and Rural Context both promote and limit physical**

**activity** The northern and rural environmental context underpinned all aspects concerning health and physical activity for persons living with dementia. The local and regional context shaped program opportunities, availability, accessibility, and preferences.

*Natural environment.* Elements including weather (e.g., harsh winter conditions), geographic location (e.g., isolation from urban centres and from physical activity opportunities), wildlife (e.g., presence of bears, cougars, and moose), and lack of daylight in the winter months influenced willingness and abilities of persons living with dementia to engage in physical activity. One care partner noted: “By 7 o’clock it’s really dark, and I don’t really feel that safe going in the dark by myself ... the temperature in the winter might be okay, but it might a sheet of ice”. Participants reported the need to adapt to changes in weather to maintain daily physical activities including outdoor walking.

*I have to wear the tall boots. So, I get my boots on, that means they go right up to the knee and so you can stomp into the snow. Sometimes you put cleats on them so you don’t slip. And I always have my poles. It’s very important to have the poles. It’s beautiful, you know. (Person living with dementia)*

Long-time residents of rural and northern communities described the easy access to natural environments including rivers, lakes, and forest trails as a facilitator of outdoor physical

1  
2  
3 activity engagement for all persons including those living with dementia. As two participants  
4  
5 individually explained:

6  
7  
8 *I used to do exercise that was more like go lift weights and workout and now it's like,*  
9 *no, unless it's fun. I like dancing. I like walking the dog in the forest or somewhere off-*  
10 *leash where I can just wander around in the trees and the mushrooms. It's hard to get*  
11 *me to go fast. I don't go fast, but you can get me to go up a hill (Person living with*  
12 *dementia)*

13  
14  
15 *I like the freedom of being away from it all in the woods, on the water—that's really*  
16 *important. In the backyard, no phones. And you just respond as you go and you're*  
17 *thinking of something you want to do, you do it. That's freedom. That's exercise.*  
18 *That's a good feeling. (Care partner of person living with dementia)*  
19

20  
21  
22 *Built environment* Although a lack of facilities and vast geographic distance to the nearest  
23  
24 urban centre were mentioned as barriers, participants described some of the unique built  
25  
26 environmental features that facilitated physical activity. Participants valued the accessible  
27  
28 infrastructure in their community: “*We actually have this incredible sidewalk system here ...*  
29  
30 *[it's] designed so that every street has access to this sidewalk system that is maintained by the*  
31 *municipality to get to downtown, to do grocery shopping, and so on” (Person living with*  
32  
33 *dementia)*. Further, participants shared how city planners in their rural community had  
34  
35 considered the needs of an aging population when designing the sidewalk (e.g., cloverleaf and  
36  
37 crescent patterns) to purposefully support safe and accessible physical activity for persons  
38  
39 with cognitive impairments.  
40  
41  
42  
43  
44  
45  
46

47 **Limitations of the health system lead to creative local solutions** The overarching structure  
48  
49 of the health care system impacted access to physical activity opportunities through three  
50  
51 main facets: the referral process and policies, communication processes, and resource  
52  
53  
54  
55  
56  
57  
58  
59

1  
2  
3 availability. Each subsequently impacted physical activity opportunities for program end-  
4  
5 users.

6  
7 Lack of capacity and mechanisms for referrals: Healthcare professionals and allied health  
8  
9 providers struggled with the process of referring persons with dementia to specialized  
10  
11 physical activity programs due to lack of capacity and resources throughout the system (e.g.,  
12  
13 staffing, limited program offerings) and absence of clear mechanisms in place to facilitate the  
14  
15 referral process. When responsibility and accountability for referrals was unclear, it led to  
16  
17 inaccuracies and gaps in assessment documentation which subsequently resulted in delayed or  
18  
19 failed referrals. In some cases, when exercise providers received inaccurate and incomplete  
20  
21 documentation during the referral process, it resulted in duplication of health assessments and  
22  
23 additional workload. One healthcare professional noted:  
24  
25

26  
27  
28 *What's on the piece of paper doesn't quite identify what the person's needs are. So, a*  
29 *lot of extra digging needs to go into that. So, whether the person needs to see a*  
30 *geriatrician which is more sort of the medical component, it's triaged that way.*  
31  
32 (Healthcare Professional)  
33

34 For persons with dementia and their care partners, the lack of a clear referral process or advice  
35  
36 from their healthcare provider led to confusion and lack of awareness about where to seek  
37  
38 trusted information about safe physical activity opportunities. One participant described their  
39  
40 frustration noting:  
41  
42

43  
44 *It's been an ongoing question, where can we get more information. "Read about it."*  
45 *Okay, we've read about it. Who can we talk to? "Alzheimer's group" or a contact or*  
46 *"your GP, he can help". We've been through all that and there isn't any. (Care*  
47 *partner of person living with dementia)*  
48

49 Poor communication and fragmented access to information leads to lack of knowledge:

50  
51 Challenges with clear and consistent communication were recognized as a barrier across all  
52  
53 participant groups. One participant described these communication challenges noting:  
54  
55  
56  
57  
58  
59  
60

1  
2  
3 *Word finding difficulties depending on the type of dementia can be a challenge for the*  
4 *person who's struggling to communicate, and for other participants as well. Maybe*  
5 *the person with dementia who also has word finding difficulties they're not*  
6 *intentionally being dishonest, but their stories change depending on the wording that*  
7 *they're using because they can't find their words and then other participants are*  
8 *concerned for them because they just heard a story that's not necessarily true, but the*  
9 *person with dementia couldn't find the words to accurately tell what was going on. So*  
10 *some communication barriers. (Allied health provider)*  
11  
12

13 Participants expressed a desire for access to resources and information specific to dementia,  
14 the disease process, and how to support physical activity opportunities that were safe and  
15 inclusive.  
16  
17

18  
19  
20 Persons living with dementia and care partners described the existing resources as  
21 inconsistent, inaccessible, or otherwise unavailable. One participant shared: *"My mother had*  
22 *Alzheimer's, my grandmother had Alzheimer's as well, and I've never come across any*  
23 *information that walks you through what to expect. That would be very helpful"* (Care partner  
24 of person living with dementia). While recognizing healthcare professionals as a key  
25 communication mechanism for information and educational resources about physical activity,  
26 one care partner shared:  
27  
28  
29  
30  
31  
32  
33  
34  
35

36 *The professionals don't have the time for this [sharing information related to dementia],*  
37 *unless you have an appointment. Like if you're on a list, it could be 3 months, could be 6*  
38 *months, it could be a year, or could be really soon. (Care partner of person living with*  
39 *dementia)*  
40  
41

42 In response, care partners connected informally to each other to promote knowledge sharing by  
43 leveraging community networks and using existing communication channels within the  
44 community. Close community connections, many based on decades of living in the same  
45 community, enabled persons living with dementia and their care partners to communicate their  
46 needs directly to healthcare professionals and allied health providers through informal  
47 relationships. Within smaller and geographically isolated communities, participants described a  
48 lack of anonymity, noting it was common to run into each other at the grocery store, public  
49  
50  
51  
52  
53  
54  
55  
56  
57  
58  
59  
60



1  
2  
3 events, or in their neighbourhood, allowing for informal connection and information exchange.  
4  
5 Participants shared print copies of resources regarding physical activity and communicated by  
6  
7 telephone to help compensate for the lack of accessibility to information formally from  
8  
9  
10 healthcare professionals and exercise providers.  
11  
12

13  
14 Limited resources lead to ongoing need for flexibility, creativity, and advocacy: Participants  
15  
16 emphasized the complexity of securing necessary resources to support high quality and  
17  
18 sustainable exercise programming.  
19  
20

21  
22 *Maybe we touched on this when we talked about barriers and the priorities for the health*  
23 *care team at this team, education and community integration doesn't often come up as a*  
24 *high priority. It's very task-oriented health care. Like, this happened, give them this*  
25 *treatment, they're done. But helping with educating on, these are the things that are*  
26 *available in the community for you to participate in because this is going to be an*  
27 *ongoing—aging is not going to stop when you leave this hospital. Having more process-*  
28 *oriented approach and more education and more community integration, but*  
29 *unfortunately, due to resources that isn't always a priority. (Allied Health Provider)*  
30

31  
32 Participants described the importance of flexibility and creativity to overcome the inability of the  
33  
34 health systems to provide physical activity opportunities, often due to limited funding, lack of  
35  
36 infrastructure, and substantial gaps in human resources. In particular, participants shared their  
37  
38 frustrations surrounding the limited specialized dementia care and services due to the limited  
39  
40 human resources. This is especially prevalent within small and heterogeneous populations, as  
41  
42 one participant noted:  
43  
44

45  
46 *there's just one or two staff for a different, very broad population sometimes because*  
47 *they don't have the same levels of functioning, but we only have ... just the bare*  
48 *amount of staff, right. Maybe that's also a challenge. We don't have enough people*  
49 *(Allied Health Provider)*  
50

51  
52 Inadequate human resources can also lead to lack of specialist knowledge regarding exercise and  
53  
54 dementia, contributing to unmet goals and objectives of both the program providers as well as  
55  
56  
57  
58  
59

1  
2  
3 participants. The shortage and/or absence of trained care providers caused changes in program  
4 design commonly by adjusting from physical to psychosocial goals. The flexibility to adjust the  
5 focus of the program allowed activities to remain operational. One exercise provider described  
6 that when healthcare professionals were unable to provide formal rehabilitation programs or  
7 exercise providers were unavailable to provide structured activities in their community, they  
8 pivoted to offer a social program instead. However, in doing so, they were also aware of the need  
9 to provide supports that fell within their own scope of practice.  
10  
11  
12  
13  
14  
15  
16  
17  
18

19 *We have to be really mindful in terms of each other's scopes, so we can't do exercise-*  
20 *whatever's called technically "exercise classes." However, we can do thing that are fun*  
21 *and fitness, which would be like kick ball and badminton (Allied Health Provider)*  
22  
23

24 To mitigate the lack of trained formal healthcare professionals and exercise providers,  
25 community champions built capacity by engaging volunteers and student trainees. One  
26 participant emphasized that:  
27  
28  
29

30  
31 *Most of the groups ... we use the students for. And it was a student actually that made*  
32 *the falls group. He did all the prep for it, everything. Got it all in line and all the stuff*  
33 *out to the doctors. We just kept it. The same with the fit group; we just kept it. And*  
34 *they love it" ... "And it works well, too (Healthcare Professional)*  
35  
36

37 Participants described making use of public spaces such as local recreation centres to organize  
38 informal activity opportunities and participate in group programs in lieu of formal exercise  
39 facilities, which may or may not be available. In one community, participants shared their use of  
40 a public multipurpose area for physical activity.  
41  
42  
43  
44

45  
46 *One of three recreation facilities .. [includes] a multi-purpose facility. There's tennis*  
47 *courts outside. There's community rooms where events could be held, meetings could be*  
48 *held. There's a gymnasium there. They do program sports, so you could go play at*  
49 *badminton" (Care partner of person living with dementia)*  
50  
51  
52  
53  
54  
55  
56  
57  
58  
59  
60

1  
2  
3 **Flexibility is needed to adapt to diverse community needs and preferences, as well as**

4 **expertise available** Healthcare professionals and allied health providers described the value of  
5  
6 working towards defining physical activity programs including a clear set of characteristics,  
7  
8 naming, and the need for trained program staff. Addressing each aspect is key to creating and  
9  
10 sustaining a successful exercise program. However, challenges experienced in northern and rural  
11  
12 communities are described below.  
13  
14  
15

16  
17  
18  
19 Defining physical activity programs is needed but can affect accessibility for persons living with  
20 dementia: Participants discussed challenges when determining whether to define and clearly  
21  
22 label a physical activity program as focused and inclusive of persons living with dementia or to  
23  
24 keep the focus more generic. Use of a clear definition acknowledging a specific focus of the  
25  
26 program designed for persons living with dementia was thought to improve clarity in participant  
27  
28 eligibility and feelings of inclusion, it was also expressed that this may limit the willingness of  
29  
30 some persons living with dementia to attend due to the stigma associated with dementia and  
31  
32 cognitive impairment. This sentiment was expressed in relation to those living in small rural  
33  
34 settings, where some people who wished to keep their diagnosis of dementia confidential were  
35  
36 potentially risking their privacy if they attended a physical activity program designed and  
37  
38 labelled for persons living with dementia. The stigma associated with dementia was mitigated in  
39  
40 small communities by offering the programs at neutral locations within the community, changing  
41  
42 the language to enhance inclusion, and normalizing the environment. One care partner  
43  
44 commented that the stigma associated with dementia was still evident in their community and  
45  
46 impacted their choices in physical activity: *“And there’s a stigma attached to it in our minds.*  
47  
48 *Not necessarily that anymore, but there has been in our past lives -- a person not right,*  
49  
50  
51  
52  
53  
54  
55  
56  
57  
58  
59  
60

1  
2  
3 *something wrong upstairs, here in the cortex.*” (Care partner of person living with dementia).

4  
5 One health care professional also noted *“If there’s an Alzheimer’s Group, but somebody doesn’t*  
6 *like to acknowledge that they have Alzheimer’s then you might not want to suggest that they go*  
7 *to an Alzheimer’s group...so that could actually be a barrier”* (Health care professional).

8  
9  
10  
11  
12 Participants also expressed that labelling a program as ‘exercise’ can be interpreted in  
13  
14 different ways. For some, ‘exercise’ may be viewed as an opportunity to enhance and maintain  
15  
16 health, while for others, exercise can be intimidating and exclusive. One exercise professional  
17  
18 described this issue:

19  
20  
21 *I have to re-approach all the time. If I approach someone and say, “Do you want to*  
22 *come exercise?” They’ll scoff at the thought of exercise. “I’m 94. I’m not going to*  
23 *exercise, today.” But then if I say, “Hey, want to come play a game with me.” Then*  
24 *they’re all for it* (Allied Health Provider)

25  
26  
27 At the same time, the lack of a clear definition for exercise was not always perceived as  
28  
29 detrimental as it can allow for fluidity in roles. For rural communities with limited capacity,  
30  
31 flexibility in job roles and volunteer engagement allowed programs to continue to run. For  
32  
33 example, one participant described how labelling a program as a social activity allowed it to be  
34  
35 offered by a variety of providers:

36  
37  
38 *We’re not physio. We do fun and fitness. Like [when] physio is unable to come one*  
39 *morning because they’re doing other things or when they’re short staffed, then we do fun*  
40 *and fitness, so we do a game, like bowling”* (Allied Health Provider)

41  
42  
43 *Balancing program design to meet everyone’s needs and expectations:* No singular physical  
44  
45 activity program or method of delivery emerged as a one size fits all answer to ensure inclusivity  
46  
47 for all persons living with dementia, at all times, and in all locations. Instead, participants shared  
48  
49 the importance of intentional decisions around program design and details including scheduling,  
50  
51 program location, participant eligibility, and method of program delivery (e.g., standing, sitting,  
52  
53 or mixed classes) to meet the needs of those within their area. These decisions can be difficult  
54  
55  
56  
57  
58  
59  
60

1  
2  
3 when serving a small but diverse group, as in rural communities, when balancing finite human  
4 and financial resources. If a program is too general, it may risk not being effective for anyone  
5 attending as noted by one exercise provider:  
6  
7

8  
9  
10 *The problem is that ... I don't think that anybody's really getting enough individual*  
11 *program in order to actually make an impact ... Even with the stretching, they're not*  
12 *necessarily getting positioned in the exact right place, but it's one instructor and 20, 25*  
13 *people. So I think programming where you have a ratio ... depending on what the abilities*  
14 *of those four people are, or three people, the helper could be helping the one that's*  
15 *needing more assistance and that could travel (Allied Health Provider)*  
16  
17

18 Additionally, participants discussed the challenge of balancing routine and structure within the  
19 programs, keeping the program flexible enough to keep those participating engaged and meet  
20 their expectations while maintaining enough structure to achieve physical fitness goals.  
21  
22

23 Flexibility in program provision, program design and provider roles was identified as a  
24 mitigation strategy which enabled providers to be responsive to the needs and preferences of  
25 persons living with dementia, scheduling, and practitioner scope of practice.  
26  
27  
28  
29  
30  
31

32  
33 **Supportive providers with flexibility are needed to help persons with dementia overcome**  
34 **challenges and fears.** Participants shared unique experiences with physical activity based on the  
35 interaction between the rural environmental setting, the person living with dementia and their  
36 care partner where applicable.  
37  
38  
39  
40  
41

42 Motivation and knowledge about physical activity: Participation in physical activity requires a  
43 conscious investment of time and personal resources. Persons living with dementia and care  
44 partners described difficulties balancing multiple demands and had difficulty prioritizing  
45 physical activity due to other scheduled health related appointments or commitments. When  
46 asked about what gets in the way of physical activity, one participant living with dementia  
47 explained there were often *“Other activities that weren't scheduled, or you're already committed*  
48  
49  
50  
51  
52  
53  
54  
55  
56  
57  
58  
59  
60

1  
2  
3 to.” Participants living with dementia noted the importance of a positive attitude and personal  
4  
5 motivation toward physical activity participation as a critical enabler, for example:  
6

7  
8 *I would enjoy more exercise. They have to change it up so it's not always the same*  
9 *because you do get bored. I don't care who you are, you get bored, so if you change*  
10 *the program a little bit every once in a while, then you're more likely to keep attending*  
11 (Person living with dementia)  
12

13 Participants living with dementia further expressed how challenging it was to find trustworthy  
14  
15 information about physical activity, impacting their ability to engage in regular activity:  
16

17  
18 *You know, the world's a big place and I think the internet has a lot of good*  
19 *information. I don't know how to access that, but I know the girls do, and I think it*  
20 *gives you a wide variety of information and choices. I don't know what other source. I*  
21 *mean, I'm sure there are other sources. I haven't a doubt that's the only one* (Person  
22 living with dementia)  
23  
24

25 Similarly, participants identified that having instructors who are knowledgeable about exercise  
26  
27 and familiar with supporting persons living with dementia to be active, would be an important  
28  
29 facilitator supporting their participation in physical activity.  
30

31  
32 *I would like to actually see whether or not they've got trainers there that could show me. I'm*  
33 *not comfortable going into a weight room thinking, "Oh, what I should be doing with*  
34 *this?.....That would be good if there were people there that would teach you how to use*  
35 *weights* (Person living with dementia)  
36

37  
38 Fear can prevent participation: For persons living with dementia, a variety of fears were  
39  
40 reported which prevented engagement in physical activity programming. These fears included:  
41  
42 the fear of being institutionalized if the program was held within a long-term care facility, the  
43  
44 fear of getting lost when needing to take public transportation to attend an exercise class, and the  
45  
46 fear of injury from falling. Care partners further expressed negative feelings towards physical  
47  
48 activity participation due to anticipation of the progressive loss of control and declining physical  
49  
50 abilities of the person living with dementia as their disease progressed. For one care partner, they  
51  
52  
53  
54  
55  
56  
57  
58  
59  
60

1  
2  
3 described how the fear not only led to distress, but that it was also an indicator for them of  
4  
5 disease progression.  
6

7  
8 *Mom doesn't do a lot of exercise. She gets lost very quickly, now, and forgets where she*  
9 *is or where she's going. She's really nervous of falling. She's terrified of snow. Like if*  
10 *there's snow or ice, she doesn't want to walk in it or she gets really stressed. Like she'll*  
11 *panic because there's snow or ice. She's really nervous of falling down. That's her*  
12 *biggest thing that she's going to fall down. And with my mom, if she falls down, she*  
13 *doesn't get, from a crawl to a stand is sometimes impossible. My mom would stand up*  
14 *and it's really hard for her to stand up. And that's something, that for me has been an*  
15 *indicator with both my parents when they couldn't get up from getting down, whether it's*  
16 *in the bathtub or when it's something's on the floor and they go down to get it and then*  
17 *they're stuck and they can't figure out how to get up and it's—and then fear comes*  
18 *because they realize they can't get up, but they're like, "But I'm supposed to be able to*  
19 *get up and I can't get up." And so, I don't know how to explain it, except that it's*  
20 *terrifying for them, and it's heartbreaking to witness, but it's also heartbreaking for each*  
21 *of them. (Care partner of person with dementia)*  
22  
23  
24

25 In recognition that these fears are common for persons living with dementia, healthcare  
26  
27 professionals and allied health providers noted the importance for fall prevention training for  
28  
29 those individuals in particular.  
30  
31

32 *Building up the confidence [of persons living with dementia] in terms of getting up from*  
33 *a fall I think is important because fear of falling is a barrier to a lot of community*  
34 *participation, recreation and leisure participation in particular is what I'm referring to,*  
35 *but yeah, fear of falling is a big barrier for getting out and then people are at risk for*  
36 *social isolation. (Allied Health Provider)*  
37  
38  
39

## 40 **DISCUSSION**

41  
42 This study explored factors influencing physical activity participation for persons living  
43  
44 with dementia in northern and rural communities and the strategies implemented in these settings  
45  
46 to mitigate barriers to physical activity participation. From the perspectives of healthcare  
47  
48 professionals, allied health providers, persons living with mild to moderate dementia, and care  
49  
50 partners, key points that emerged were the lack of health system support for physical activity  
51  
52 participation, and substantial gaps in tailored exercise program offerings and knowledge needed  
53  
54  
55  
56  
57  
58  
59  
60

1  
2  
3 to provide accessible, inclusive opportunities for physical activity. In response to the substantial  
4 gaps experienced at the systems level, community-driven initiatives emerged. Community-based  
5 solutions, developed in response to gaps in available services and supports, relied on a limited  
6 number of community champions to provide physical activity programming. These community-  
7 specific initiatives were organically tailored to address the needs of the community of focus with  
8 consideration of the unique environmental context and finite human and financial resources. Fear  
9 of injury and stigma associated with a dementia diagnosis demand a multi-program response  
10 with flexibility, inclusivity and knowledge, not only for persons living with dementia but also for  
11 care partners who support persons living with dementia to engage in physical activity.  
12  
13  
14  
15  
16  
17  
18  
19  
20  
21  
22  
23

24 The individual-level factors influencing physical activity for persons living with  
25 dementia, including fear, stigma, cognitive function, and lack of knowledge, are commonly  
26 reported in the literature.[18] While these are still true for people living in northern and rural  
27 communities, fear and stigma are heightened due to the smaller population size and lack of  
28 dementia-related knowledge due to limited access to trained providers or appropriate facilities.  
29 Commonly in rural communities, while individual-level barriers persist, environmental and  
30 community-level factors create an additional barrier that must be overcome to engage in physical  
31 activity, which is particularly true for persons living with dementia.[34]  
32  
33  
34  
35  
36  
37  
38  
39  
40  
41

42 Context is essential to understand the factors influencing physical activity participation  
43 for persons living with dementia in northern and rural communities. In alignment with our  
44 previous work, the natural environment can both enhance physical activity participation and  
45 exercise (e.g., proximity to outdoor recreation) and, at times, limit physical activity (e.g., winter  
46 weather, ice).[22] While the availability of facilities and accessible locations suitable for exercise  
47 provision and access to specialized exercise providers is a facilitator of physical activity for  
48  
49  
50  
51  
52  
53  
54  
55  
56  
57  
58  
59  
60



1  
2  
3 persons living with dementia in urban areas,[19] our findings highlight the near complete  
4  
5 absence of such facilities and providers in rural and northern communities. While it is common  
6  
7 for exercise providers to have limited knowledge of dementia and training regarding inclusive  
8  
9 practices in physical activities,[24] this is amplified in rural communities by the continued  
10  
11 reliance on exercise providers without formal training (e.g., rehabilitation or recreation  
12  
13 providers) working ‘off the side of their desk’ to meet community needs. The lack of trained and  
14  
15 specialized staff leads to inconsistent program content and availability, fragmentation of program  
16  
17 accessibility across different communities, and limited capacity for formal assessment. The lack  
18  
19 of health systems leadership, authority, regulation, and quality control specific to physical  
20  
21 activity programming have left individuals living in northern and rural communities to take a  
22  
23 community-driven, grass-roots approach to support inclusion of persons living with dementia in  
24  
25 physical activity and an overreliance on non-profit community organizations. In response to the  
26  
27 lack of leadership from the health system to support northern and rural communities, individual  
28  
29 community champions have emerged, focussed on building and enhancing community-level  
30  
31 programs to address existing deficits. When access to the program relies on knowledge and  
32  
33 awareness of community champions and informal networks, persons living with dementia and  
34  
35 care partners who are not well connected and already engaged in the community may be unable  
36  
37 to access physical activity programming. The issues identified in this study, which are present at  
38  
39 multiple levels, warrant a collaborative response between communities and health systems to  
40  
41 enhance equity in the ability of persons living with dementia to access physical activity supports,  
42  
43 especially in rural and northern communities.  
44  
45  
46  
47  
48  
49  
50  
51  
52

## 53 CONCLUSIONS

54  
55  
56  
57  
58  
59  
60

1  
2  
3 Physical activity opportunities and experiences for persons living with dementia living in rural  
4 and northern communities are shaped by the environmental context and limited accessibility to  
5 specialized programming. Local champions risk burnout by working to fill gaps left by absent  
6 health and non-profit sectors in small communities, limiting the long-term capacity and support  
7 in rural communities for the aging population. It is important to support existing community  
8 leaders in a way that respects local knowledge and expertise.  
9  
10  
11  
12  
13  
14  
15  
16  
17  
18

19 **Figure 1 Legend:** Key findings by theme organized according to the social ecological model  
20  
21  
22  
23  
24  
25  
26  
27  
28  
29  
30  
31  
32  
33  
34  
35  
36  
37  
38  
39  
40  
41  
42  
43  
44  
45  
46  
47  
48  
49  
50  
51  
52  
53  
54  
55  
56  
57  
58  
59  
60

1  
2  
3 **Contributorship Statement:** All authors were actively engaged in this project in accordance  
4 with the ICMJE guidelines for authorship. Freeman and Middleton were involved in all aspects  
5 of this research. Pelletier was involved in all aspects of the manuscript development including  
6 data analysis, writing, and editing. Bechard was involved in planning the project, data collection,  
7 and editing of the manuscript. Regan was involved in planning the project and editing of the  
8 manuscript. Ward was involved in data analysis, drafting, and editing the manuscript. Somani  
9 was involved in drafting and editing the manuscript.  
10  
11  
12  
13  
14  
15  
16  
17  
18  
19  
20  
21

22 **Competing interests:** No competing interest.  
23  
24  
25

26 **Funding:** This study was supported by grants received from the Alzheimer's Society Research  
27 Program and from the Canadian Institute for Health Research award number PEH 157075.  
28  
29  
30  
31  
32

33 **Data sharing Statement:** No additional data available.  
34  
35  
36  
37

38 **Patient and Public Involvement:** Our work is guided by a large stakeholder advisory team  
39 including persons with dementia, care partners, physical activity providers, researchers, and  
40 health care experts. We wish to acknowledge and thank all study participants, members of the  
41 DICE team, and Rebecca Ferris for her support.  
42  
43  
44  
45  
46  
47  
48  
49  
50  
51  
52  
53  
54  
55  
56  
57  
58  
59  
60

## References

- [1] World Health Organization. Dementia fact sheet. World Health Organization 2021. <https://www.who.int/news-room/fact-sheets/detail/dementia>(accessed Sep 2021).
- [2] Vedel I, Sheets D, McAiney C, et al. CCCDTD5: Individual and community-based psychosocial and other non-pharmacological interventions to support persons living with dementia and their caregivers. *Alzheimer's & Dementia: Translational Research & Clinical Interventions* 2020;6:1e12086. doi:10.1002/trc2.12086.
- [3] Alzheimer Society of Canada. Staying Physically active. <https://alzheimer.ca/en/help-support/im-living-dementia/living-well-dementia/staying-physically-active>(accessed Sep 2021).
- [4] Blankevoort CG, Van Heuvelen MJ, Boersma F, et al. Review of effects of physical activity on strength, balance, mobility and ADL performance in elderly subjects with dementia. *Dement Geriatr Cogn Disord* 2010;30:392–402. doi:10.1159/000321357.
- [5] Eshkoo SA, Hamid, TA, Mun, CY, et al. (2015). Mild cognitive impairment and its management in older people. *Clin Interv Aging* 2015;10;687. doi:10.2145/CIA.S73922.
- [6] Ginis KA, Heisz J, Spence JC, et al. Formulation of evidence-based messages to promote the use of physical activity to prevent and manage Alzheimer's disease. *BMC Public Health* 2017;17:209. doi:10.1186/s12889-017-4090-5.
- [7] Erickson KI, Hillman C, Stillman CM, et al. Physical activity, cognition, and brain outcomes: a review of the 2018 physical activity guidelines. *Med Sci Sports Exerc* 2019;51:6:1242. doi:10.1249/MSS.0000000000001936.
- [8] Malthouse R, Fox F. Exploring experiences of physical activity among people with Alzheimer's disease and their spouse carers: a qualitative study. *Physiotherapy* 2014;100:169-175. doi:10.1016/j.physio.2013.10.002.
- [9] Cedervall Y, Torres S, Åberg AC. Maintaining well-being and selfhood through physical activity: experiences of people with mild Alzheimer's disease. *Aging Ment Health* 2015;19:8: 679-688. doi: 10.1080/13607863.2014.962004.
- [10] Kontos P, Grigorovich A, Dupuis S, et al. Raising the curtain on stigma associated with dementia: fostering a new cultural imaginary for a more inclusive society. *Crit Public Health* 2020;30:91-102. doi:10.1080/09581596.2018.1508822.
- [11] Hartman YAW, Karssemeijer EGA, Van Diepen LAM, et al. Dementia Patients Are More Sedentary and Less Physically Active than Age- and Sex-Matched Cognitively Healthy Older Adults. *Dement Geriatr Cogn Disord* 2018;46:81-89. doi:10.1159/000491995.
- [12] Laurin D, Verreault R, Lindsay J, et al. Physical activity and risk of cognitive impairment and dementia in elderly persons. *Arch Neurol* 2001;58:498-504. doi:10.1001/archneur.58.3.498.

- 1  
2  
3 [13] Bowes A, Dawson A, Jepson R, et al. Physical activity for people with dementia: a  
4 scoping study. *BMC geriatr* 2013;13:1-10. doi: 10.1186/1471-2318-13-129.  
5
- 6 [14] McLeroy KR, Bibeau D, Steckler A, et al. An ecological perspective on health  
7 promotion programs. *Health Educ Q* 1988;15:351-377  
8 doi:10.1177/109019818801500401.  
9
- 10 [15] Stubbs B, Eggermont L, Soundy A, et al. What are the factors associated with physical  
11 activity (PA) participation in community dwelling adults with dementia? A systematic  
12 review of PA correlates. *Arch Gerontol Geriatr* 2014;59:2:195-203. doi:  
13 10.1016/j.archger.2014.06.006.  
14
- 15 [16] Hancox JE, van der Wardt V, Pollock K, et al. Factors influencing adherence to home-  
16 based strength and balance exercises among older adults with mild cognitive  
17 impairment and early dementia: promoting activity, independence and stability in early  
18 dementia (PrAISED). *PLoS one* 2019;14:e0217387.  
19 <https://doi.org/10.1371/journal.pone.0217387>.  
20
- 21 [17] Dening T, Thomas A. Oxford textbook of old age psychiatry. Oxford University Press  
22 2013:1-823.  
23
- 24 [18] van Alphen HJ, Hortobagyi T, van Heuvelen MJ. Barriers, motivators, and facilitators  
25 of physical activity in dementia patients: a systematic review. *Arch Gerontol Geriatr*  
26 2016;66:109-118. doi:10.1016/j.archger.2016.05.008.  
27
- 28 [19] Hobson N, Dupuis SL, Giangregorio LM, et al. Perceived Facilitators and Barriers to  
29 Exercise Among Older Adults With Mild Cognitive Impairment and Early Dementia.  
30 *J Aging Phys Act* 2020;28:2:208-218. doi:10.1123/japa.2019-0010.  
31
- 32 [20] MacGregor-Fors I, Vázquez LB. Revisiting ‘rural’. *Sci Total Environ*  
33 2020;741:132789. doi:10.1016/j.scitotenv.2019.06.135.  
34
- 35 [21] Coates K, Poelzer G. The next northern challenge: the reality of the provincial  
36 north. Macdonald-laurier institute publication 2014 April.  
37 <https://www.macdonaldlaurier.ca/files/pdf/MLITheProvincialNorth04-14-Final.pdf>  
38 (accessed Aug 2021).  
39
- 40 [22] Ward K, Pousette A, Pelletier CA. Not Everybody’s an Athlete, But They Certainly  
41 Can Move”: Facilitators of Physical Activity Maintenance in Older Adults in a  
42 Northern and Rural Setting. *J Aging Phys Act* 2020;28:6: 854-863.  
43 doi:10.1123/japa.2019-0393.  
44
- 45 [23] Northern Health Authority. (2015) Healthy Aging in the North: Action Plan. Northern  
46 Health Authority 2015.  
47 [https://www.northernhealth.ca/sites/northern\\_health/files/health-](https://www.northernhealth.ca/sites/northern_health/files/health-information/seniors/documents/healthy-aging-in-the-north-action-plan-2015.pdf)  
48 [information/seniors/documents/healthy-aging-in-the-north-action-plan-2015.pdf](https://www.northernhealth.ca/sites/northern_health/files/health-information/seniors/documents/healthy-aging-in-the-north-action-plan-2015.pdf)  
49 (accessed Aug 2021).  
50
- 51 [24] Bechard LE, McDougall A, Mitchell C, et al. Dementia and mild cognitive impairment  
52 inclusive exercise: perceptions, experiences, and needs of community exercise  
53 providers. *PLOS ONE* 2020;15: e0238187. doi:[10.1371/journal.pone.0238187](https://doi.org/10.1371/journal.pone.0238187).  
54  
55  
56  
57  
58  
59  
60

- 1  
2  
3 [25] Canadian Institutes of Health Research. Strategy for Patient-Oriented Research:  
4 Patient Engagement Framework. [https://cihr-irsc.gc.ca/e/documents/spor\\_framework-](https://cihr-irsc.gc.ca/e/documents/spor_framework-en.pdf)  
5 [en.pdf](https://cihr-irsc.gc.ca/e/documents/spor_framework-en.pdf) (accessed Sept 2021).  
6  
7 [26] Rural Coordination Centre of BC. Rural Practice Subsidiary Agreement.  
8 <https://rccbc.ca/rccbc/about-the-jsc/rsa-communities/> (accessed Sept 2021).  
9  
10 [27] Polit DF, Beck CT. Nursing research: Principles and methods. Lippincott Williams &  
11 Wilkins 2004;729.  
12  
13 [28] Morgan DL. Planning and research design for focus groups. Focus groups as  
14 qualitative research 1997;16.  
15  
16 [29] Wong LP. Focus group discussion: a tool for health and medical research. *Singapore*  
17 *Med J* 2008;49:256-60.  
18  
19 [30] Tausch AP, Menold N. Methodological aspects of focus groups in health research:  
20 results of qualitative interviews with focus group moderators. *Glob Qual Nurs Res*  
21 2016;3: doi:10.1177/2333393616630466.  
22  
23 [31] Clarke V, Braun V. Thematic analysis. In Encyclopedia of critical psychology.  
24 Springer New York NY 2014;1947-1952.  
25  
26 [32] Braun V, Clarke V. Using thematic analysis in psychology. *Qual Res Psychol*  
27 2006;3:2:77-101. doi: 10.1191/1478088706qp063oa.  
28  
29 [33] Spence JC, Lee RE. (2003). Toward a comprehensive model of physical activity.  
30 *Psychol Sport Exerc* 2003;4:7-24. doi: 10.1016/S1469-0292(02)00014-6.  
31  
32 [34] Pelletier CA, White N, Duchesne A, et al. Barriers to physical activity for adults in  
33 rural and urban Canada: A cross-sectional comparison. *SSM Ment Health*  
34 2021;6:100964. doi: [10.1016/j.ssmph.2021.100964](https://doi.org/10.1016/j.ssmph.2021.100964).  
35  
36  
37  
38  
39  
40  
41  
42  
43  
44  
45  
46  
47  
48  
49  
50  
51  
52  
53  
54  
55  
56  
57  
58  
59  
60

1  
2  
3  
4  
5  
6  
7  
8  
9  
10  
11  
12  
13  
14  
15  
16  
17  
18  
19  
20  
21  
22  
23  
24  
25  
26  
27  
28  
29  
30  
31  
32  
33  
34  
35  
36  
37  
38  
39  
40  
41  
42  
43  
44  
45  
46  
47

Table 1: Identified challenges and mitigations strategies mapped to the social ecological model

| Level                             | Identified Challenges                                                                                                                                                                               | Mitigation Strategies                                                                                                                                                                                                                                                                                                                                                                                       |
|-----------------------------------|-----------------------------------------------------------------------------------------------------------------------------------------------------------------------------------------------------|-------------------------------------------------------------------------------------------------------------------------------------------------------------------------------------------------------------------------------------------------------------------------------------------------------------------------------------------------------------------------------------------------------------|
| <b>Northern and Rural Context</b> | <ul style="list-style-type: none"> <li>• Winter weather and conditions</li> <li>• Inaccessible built environment</li> <li>• Lack of specialized facilities and distance to opportunities</li> </ul> | <ul style="list-style-type: none"> <li>• Appropriate clothing and footwear, knowledge on strategies for being active and staying safe (e.g., walking on ice to prevent falls)</li> <li>• Adjust to seasonal activities</li> <li>• Advocate for connected pathways and accessible sidewalks</li> <li>• Taking transit, sharing of limited facilities between social and physical activity program</li> </ul> |
| <b>Health System</b>              | <ul style="list-style-type: none"> <li>• Fragmented Communication Process</li> <li>• Inconsistent Referral Process</li> </ul>                                                                       | <ul style="list-style-type: none"> <li>• Community champions leverage informal networks</li> <li>• Take advantage of gaps to allow flexibility in community-driven ground-up response</li> </ul>                                                                                                                                                                                                            |
| <b>Physical Activity Program</b>  | <ul style="list-style-type: none"> <li>• Balancing routine and structure with participant choice and autonomy</li> </ul>                                                                            | <ul style="list-style-type: none"> <li>• Flexibility to allow adjustment to cognitive and physical abilities of participants</li> <li>• Accommodation of diverse abilities in mixed classes and/or by team instruction</li> </ul>                                                                                                                                                                           |
|                                   | <ul style="list-style-type: none"> <li>• Lack of consistency in programming</li> </ul>                                                                                                              | <ul style="list-style-type: none"> <li>• Developed informal work-arounds through provider collaboration (e.g., job sharing, willingness to work outside scope of practice)</li> <li>• Program scheduling responsive to participant needs, offered when and where demand is high</li> <li>• Engagement of volunteers</li> </ul>                                                                              |
|                                   | <ul style="list-style-type: none"> <li>• Lack of definition of program, and meaning of physical activity and exercise</li> </ul>                                                                    | <ul style="list-style-type: none"> <li>• Allows for flexibility in program provision (switch from physical to psychosocial goals when formal exercise provider unavailable)</li> <li>• Acceptance that no one program is everything to everyone</li> </ul>                                                                                                                                                  |
|                                   | <ul style="list-style-type: none"> <li>• Lack of accessibility to reliable information source</li> </ul>                                                                                            | <ul style="list-style-type: none"> <li>• Knowledge sharing within community social network</li> <li>• Maintain traditional communication strategies (mail out of print activity book, person to person telephone connection)</li> </ul>                                                                                                                                                                     |
|                                   | <ul style="list-style-type: none"> <li>• Lack of resources</li> </ul>                                                                                                                               | <ul style="list-style-type: none"> <li>• Education and training come from multiple sources</li> <li>• Flexible and adaptable in job role and volunteer engagement to address human resource capacity</li> </ul>                                                                                                                                                                                             |

|                            |                                                                           |                                                                                                                                                                                                                                                                                                                                                                                                     |
|----------------------------|---------------------------------------------------------------------------|-----------------------------------------------------------------------------------------------------------------------------------------------------------------------------------------------------------------------------------------------------------------------------------------------------------------------------------------------------------------------------------------------------|
|                            |                                                                           | <ul style="list-style-type: none"> <li>• Provider collaboration and sharing of limited resources across programs</li> </ul>                                                                                                                                                                                                                                                                         |
| <b>Program Participant</b> | <ul style="list-style-type: none"> <li>• Stigma of dementia</li> </ul>    | <ul style="list-style-type: none"> <li>• Offer program in neutral community location</li> <li>• Modified language to describe program to enhance inclusion for persons with dementia</li> <li>• Improved knowledge of benefits of exercise by participant and/or care partner</li> </ul>                                                                                                            |
|                            | <ul style="list-style-type: none"> <li>• Perception of safety</li> </ul>  | <ul style="list-style-type: none"> <li>• Acknowledge fear and provide tailored programming support</li> <li>• Education and training on risk</li> <li>• Confidence and trust in program providers</li> </ul>                                                                                                                                                                                        |
|                            | <ul style="list-style-type: none"> <li>• Scheduling priorities</li> </ul> | <ul style="list-style-type: none"> <li>• Participant and/or care partner awareness of program availability and benefits</li> <li>• Multiple programming options</li> <li>• Flexibility among community health providers to accommodate participant scheduling needs</li> <li>• Participants and care partners perceive physical activity as meaningful</li> <li>• Transportation support</li> </ul> |



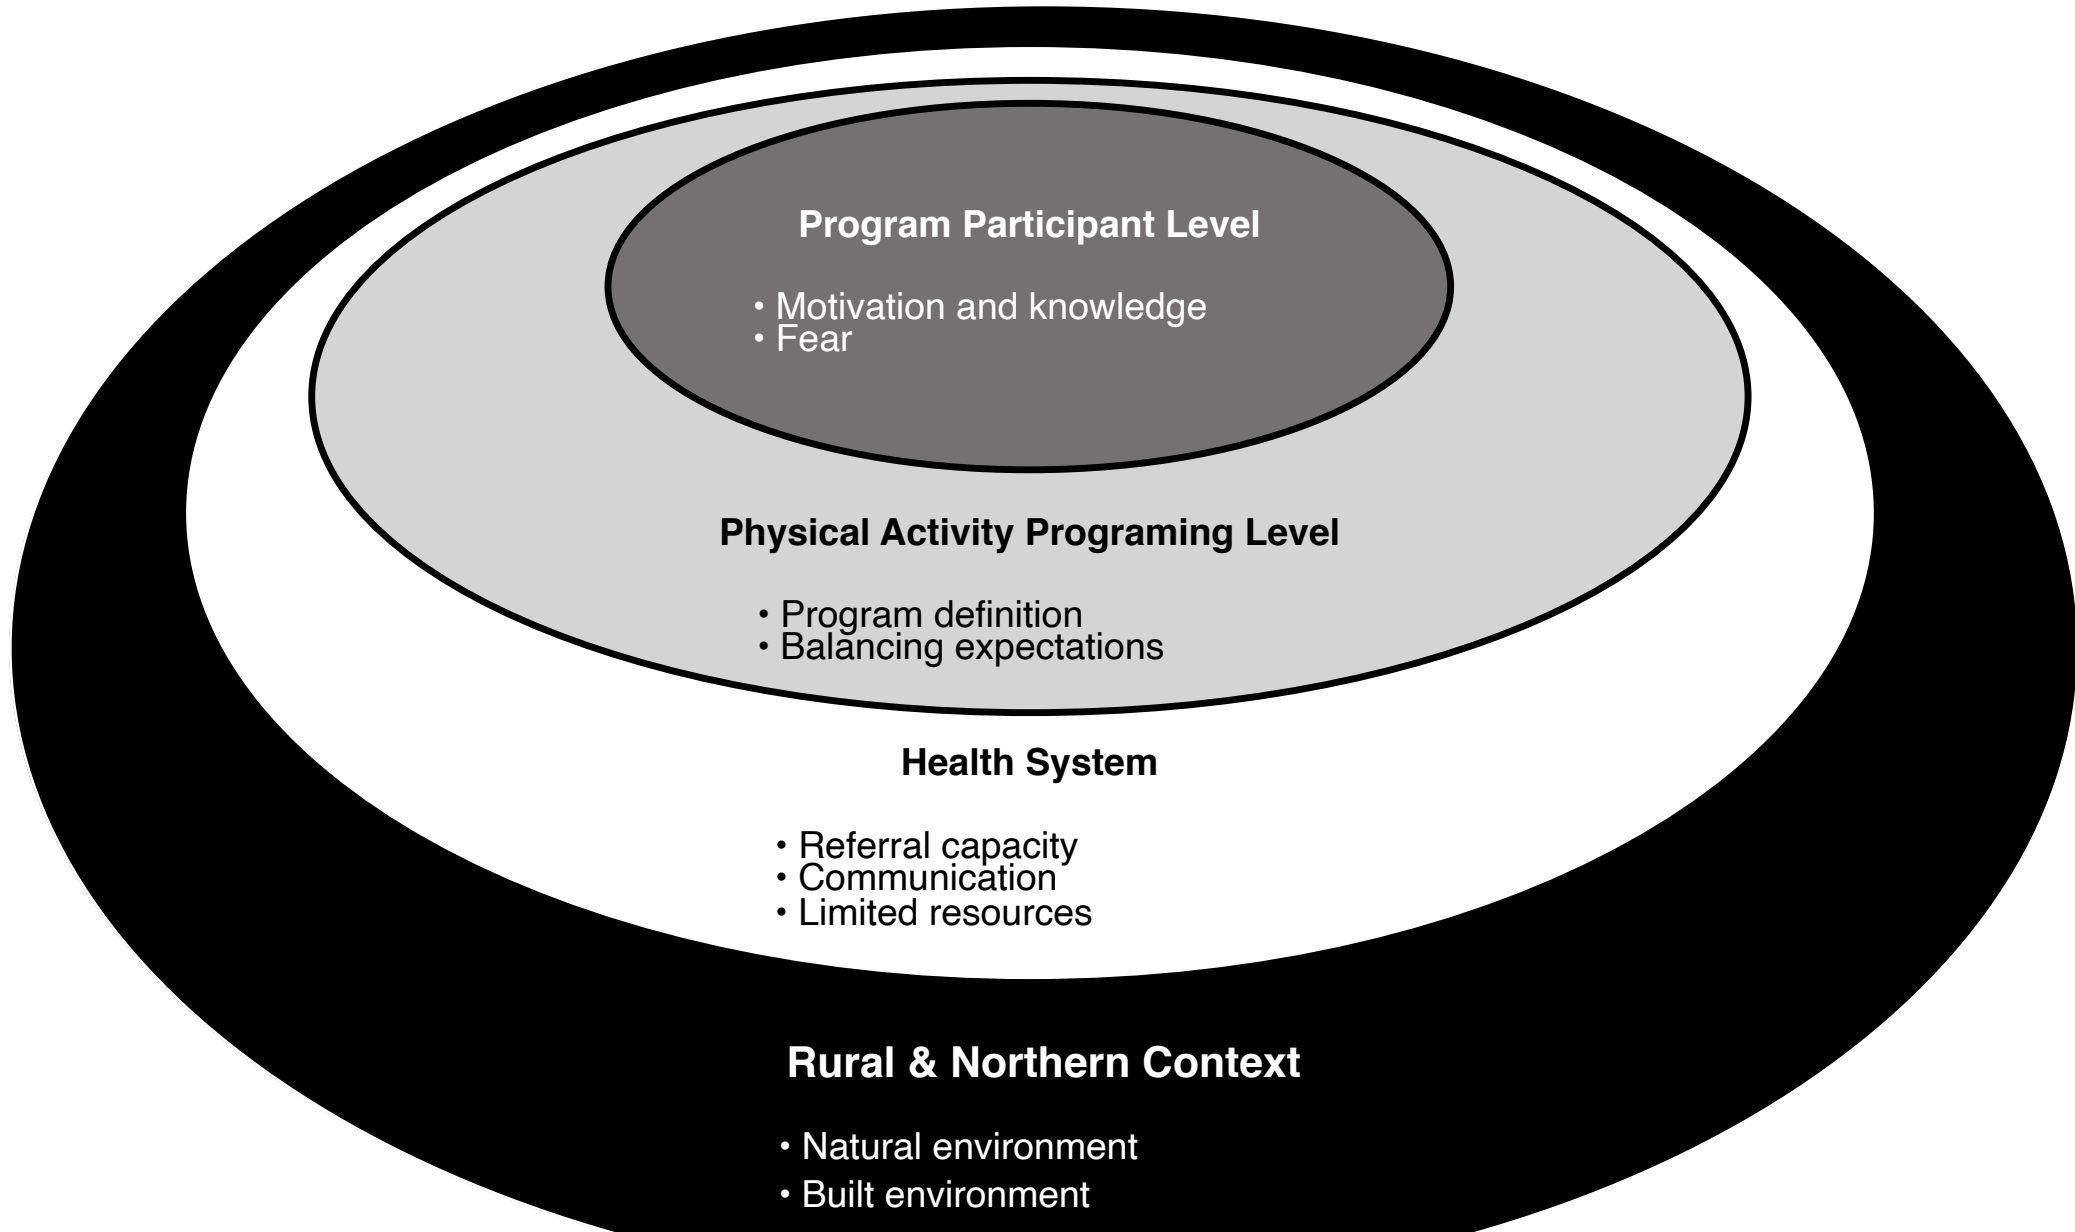

1  
2  
3  
4  
5  
6  
7  
8  
9  
10  
11  
12  
13  
14  
15  
16  
17  
18  
19  
20  
21  
22  
23  
24  
25  
26  
27  
28  
29  
30  
31  
32  
33  
34  
35  
36  
37  
38  
39  
40  
41

**Supplementary File 1:** Author response to consolidated criteria for reporting qualitative studies (COREQ): 32-item checklist

| No                                             | Item                                     | Author Response                                                                                                                                                                                                                                                                                                                                               |
|------------------------------------------------|------------------------------------------|---------------------------------------------------------------------------------------------------------------------------------------------------------------------------------------------------------------------------------------------------------------------------------------------------------------------------------------------------------------|
| <b>Domain 1: Research team and reflexivity</b> |                                          |                                                                                                                                                                                                                                                                                                                                                               |
| Personal Characteristics                       |                                          |                                                                                                                                                                                                                                                                                                                                                               |
| 1.                                             | Interviewer/facilitator                  | SF conducted all interviews. p. 8                                                                                                                                                                                                                                                                                                                             |
| 2.                                             | Credentials                              | SF has a PhD and is experienced in conducting qualitative research.                                                                                                                                                                                                                                                                                           |
| 3.                                             | Occupation                               | SF is an Associate Professor in the School of Nursing at UNBC.                                                                                                                                                                                                                                                                                                |
| 4.                                             | Gender                                   | Female                                                                                                                                                                                                                                                                                                                                                        |
| 5.                                             | Experience and training                  | SF has previous training in qualitative research and has completed multiple qualitative research studies. p. 8                                                                                                                                                                                                                                                |
| Relationship with participants                 |                                          |                                                                                                                                                                                                                                                                                                                                                               |
| 6.                                             | Relationship established                 | None                                                                                                                                                                                                                                                                                                                                                          |
| 7.                                             | Participant knowledge of the interviewer | The participants knew that the interviews and focus groups were being conducted to learn from participants about their perspectives and experiences with exercise involving persons with dementia.                                                                                                                                                            |
| 8.                                             | Interviewer characteristics              | None                                                                                                                                                                                                                                                                                                                                                          |
| <b>Domain 2: study design</b>                  |                                          |                                                                                                                                                                                                                                                                                                                                                               |
| Theoretical framework                          |                                          |                                                                                                                                                                                                                                                                                                                                                               |
| 9.                                             | Methodological orientation and Theory    | Thematic analysis guided by Braun and Clarke's 6 steps (see p.7-8).<br>-- Clarke V, Braun V. Thematic analysis. In Encyclopedia of critical psychology. Springer New York NY 2014;1947-1952.<br>-- Braun V, Clarke V. Using thematic analysis in psychology. Qual Res Psychol 2006;3:2:77-101. doi: 10.1191/1478088706qp063oa.                                |
| Participant selection                          |                                          |                                                                                                                                                                                                                                                                                                                                                               |
| 10.                                            | Sampling                                 | Purposive, non-probability sampling, p. 6                                                                                                                                                                                                                                                                                                                     |
| 11.                                            | Method of approach                       | Snowball approach - E-mail, posters, word of mouth, p. 6                                                                                                                                                                                                                                                                                                      |
| 12.                                            | Sample size                              | 29 p. 6                                                                                                                                                                                                                                                                                                                                                       |
| 13.                                            | Non-participation                        | 0                                                                                                                                                                                                                                                                                                                                                             |
| Setting                                        |                                          |                                                                                                                                                                                                                                                                                                                                                               |
| 14.                                            | Setting of data collection               | Rural and medium sized city in Western Canada p. 7                                                                                                                                                                                                                                                                                                            |
| 15.                                            | Presence of non-participants             | No                                                                                                                                                                                                                                                                                                                                                            |
| 16.                                            | Description of sample                    | Healthcare professionals (e.g., physiotherapists, rehabilitation assistants, registered nurses; n=8); allied health providers experienced in providing community exercise programs (n=12); persons living with mild to moderate dementia or cognitive impairment (n=4); and care partners of persons living with dementia or cognitive impairment (n=5). p. 6 |
| Data collection                                |                                          |                                                                                                                                                                                                                                                                                                                                                               |
| 17.                                            | Interview guide                          | Interview guide was reviewed by diverse team of stakeholders including health care professionals, allied health providers, researchers, persons with dementia, and care partners of persons living with dementia. P. 7                                                                                                                                        |
| 18.                                            | Repeat interviews                        | No                                                                                                                                                                                                                                                                                                                                                            |
| 19.                                            | Audio/visual recording                   | Audio recording was done p. 7                                                                                                                                                                                                                                                                                                                                 |

|     |                      |                                            |
|-----|----------------------|--------------------------------------------|
| 20. | Field notes          | Field notes were taken p. 7                |
| 21. | Duration             | Interviews lasted between 1 - 2 hours p. 7 |
| 22. | Data saturation      | Yes                                        |
| 23. | Transcripts returned | No                                         |

| No                                     | Item                           | Author Response        |
|----------------------------------------|--------------------------------|------------------------|
| <b>Domain 3: analysis and findings</b> |                                |                        |
| Data analysis                          |                                |                        |
| 24.                                    | Number of data coders          | 3                      |
| 25.                                    | Description of the coding tree | No                     |
| 26.                                    | Derivation of themes           | Derived from data p. 9 |
| 27.                                    | Software                       | Excel, Word p. 9       |
| 28.                                    | Participant checking           | No                     |
| Reporting                              |                                |                        |
| 29.                                    | Quotations presented           | Yes p. 10-20           |
| 30.                                    | Data and findings consistent   | Yes p. 9-20            |
| 31.                                    | Clarity of major themes        | Yes p. 9-20            |
| 32.                                    | Clarity of minor themes        | Yes p. 9-20            |

# BMJ Open

## Factors influencing participation in physical activity for persons living with dementia in rural and northern communities in Canada: A qualitative study

|                                 |                                                                                                                                                                                                                                                                                                                                                                                                    |
|---------------------------------|----------------------------------------------------------------------------------------------------------------------------------------------------------------------------------------------------------------------------------------------------------------------------------------------------------------------------------------------------------------------------------------------------|
| Journal:                        | <i>BMJ Open</i>                                                                                                                                                                                                                                                                                                                                                                                    |
| Manuscript ID                   | bmjopen-2022-060860.R1                                                                                                                                                                                                                                                                                                                                                                             |
| Article Type:                   | Original research                                                                                                                                                                                                                                                                                                                                                                                  |
| Date Submitted by the Author:   | 04-Apr-2022                                                                                                                                                                                                                                                                                                                                                                                        |
| Complete List of Authors:       | Freeman, Shannon; University of Northern British Columbia, Nursing<br>Pelletier, Chelsea; University of Northern British Columbia<br>Ward, Kristin; University of Northern British Columbia<br>Bechard, Lauren; University of Waterloo<br>Regan, Kayla; University of Waterloo<br>somani, salima; University of Northern British Columbia<br>Middleton, Laura; University of Waterloo, Kinesiology |
| <b>Primary Subject Heading</b>: | Geriatric medicine                                                                                                                                                                                                                                                                                                                                                                                 |
| Secondary Subject Heading:      | Public health                                                                                                                                                                                                                                                                                                                                                                                      |
| Keywords:                       | Dementia < NEUROLOGY, GERIATRIC MEDICINE, HEALTH SERVICES ADMINISTRATION & MANAGEMENT, Quality in health care < HEALTH SERVICES ADMINISTRATION & MANAGEMENT, PUBLIC HEALTH, QUALITATIVE RESEARCH                                                                                                                                                                                                   |
|                                 |                                                                                                                                                                                                                                                                                                                                                                                                    |

SCHOLARONE™  
Manuscripts

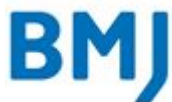

I, the Submitting Author has the right to grant and does grant on behalf of all authors of the Work (as defined in the below author licence), an exclusive licence and/or a non-exclusive licence for contributions from authors who are: i) UK Crown employees; ii) where BMJ has agreed a CC-BY licence shall apply, and/or iii) in accordance with the terms applicable for US Federal Government officers or employees acting as part of their official duties; on a worldwide, perpetual, irrevocable, royalty-free basis to BMJ Publishing Group Ltd ("BMJ") its licensees and where the relevant Journal is co-owned by BMJ to the co-owners of the Journal, to publish the Work in this journal and any other BMJ products and to exploit all rights, as set out in our [licence](#).

The Submitting Author accepts and understands that any supply made under these terms is made by BMJ to the Submitting Author unless you are acting as an employee on behalf of your employer or a postgraduate student of an affiliated institution which is paying any applicable article publishing charge ("APC") for Open Access articles. Where the Submitting Author wishes to make the Work available on an Open Access basis (and intends to pay the relevant APC), the terms of reuse of such Open Access shall be governed by a Creative Commons licence – details of these licences and which [Creative Commons](#) licence will apply to this Work are set out in our licence referred to above.

Other than as permitted in any relevant BMJ Author's Self Archiving Policies, I confirm this Work has not been accepted for publication elsewhere, is not being considered for publication elsewhere and does not duplicate material already published. I confirm all authors consent to publication of this Work and authorise the granting of this licence.

1  
2  
3  
4 **Factors influencing participation in physical activity for persons living with dementia in**  
5 **rural and northern communities in Canada: A qualitative study**  
6  
7

8  
9 Freeman S, Pelletier C, Ward K, Bechard L, Regan, K, Somani S, and Middleton L.  
10

11  
12  
13 Corresponding Author:  
14

15  
16 Dr. Shannon Freeman  
17 Associate Professor, School of Nursing  
18 University of Northern British Columbia  
19 3333 University Way  
20 Prince George, BC  
21 V2N 4Z9  
22 Canada  
23 e-mail: [shannon.freeman@unbc.ca](mailto:shannon.freeman@unbc.ca)  
24  
25  
26  
27  
28  
29  
30  
31  
32  
33  
34  
35  
36  
37  
38  
39  
40  
41  
42  
43  
44  
45  
46  
47  
48  
49  
50  
51  
52  
53  
54  
55  
56  
57  
58  
59  
60

## Abstract

**Objective:** In recognition that engagement in physical activities for persons living with dementia can be challenging in rural and northern communities, the objective of this study was to explore the factors influencing physical activity participation among persons living with dementia in rural/northern communities and to identify locally-driven mitigation strategies participants used to address barriers to physical activity.

**Setting:** Interviews and focus groups were conducted in two locations in northern British Columbia, Canada including a rural community (<10,000 persons) and a medium sized geographically isolated city (<80,000 persons). Both communities are located at substantial distances (>800km) from larger urban centres.

**Participants:** Twenty-nine individuals participated including healthcare providers(n=8), community exercise professionals(n=12), persons living with dementia(n=4), and care partners (n=5).

**Results:** Rural and northern contextual factors including aspects of the built and natural environment were the main drivers of physical activity for persons living with dementia. Limited capacity in the health system to support physical activity due to a lack of referrals, poor communication mechanisms, and limited resources for programming created challenges for physical activity participation. At the community level, local champions filled gaps in physical activity programming by leveraging informal networks to organize opportunities. Program level factors included a lack of consistency in staff, and challenges defining program scope given limited population size and the fear of stigma for persons living with dementia.

**Conclusions:** Environmental context and limited access to specialized programming affect the opportunities for persons living with dementia to engage in physical activities. Rural and

1  
2  
3 northern communities showed resiliency in providing physical activity opportunities yet  
4  
5 remained fragile due to human resource challenges. Without reliable resources and sustained  
6  
7 support from the health system, local champions remain vulnerable to burnout. Enhancing  
8  
9 support for local champions may provide greater stability and support to physical activity  
10  
11 promotion in rural and northern communities.  
12  
13  
14  
15

### 16 **Strengths and limitations of this study:**

- 17
- 18
- 19 • A study strength includes the engagement of diverse stakeholders (persons living with  
20 dementia, care partners, allied health providers experienced in providing community exercise  
21 programs, and healthcare professionals) contributing varying perspectives.
- 22 • A strength of employing a qualitative approach was our ability to describe in-depth the  
23 challenges participants faced at varying levels of the social-ecological model.  
24
- 25 • A strength of the study is the inclusion of participants from two separate communities  
26 enabling a reflection on different needs and environments
- 27 • A limitation of this study is that relatively less participants living with dementia or mild  
28 cognitive impairment compared to other participant groups
- 29 • As this study was conducted prior to the COVID-19 pandemic, a limitation the impact of the  
30 pandemic restrictions and social distancing protocols on physical activity experiences of  
31 persons living with dementia is unknown.  
32  
33

34 **Keywords:** Physical activity, exercise, dementia, cognitive impairment, rural health,  
35  
36 Alzheimer's disease, social ecological model  
37  
38  
39  
40  
41  
42  
43  
44  
45  
46  
47  
48  
49  
50  
51  
52  
53  
54  
55  
56  
57  
58  
59  
60



## INTRODUCTION

Dementia is an umbrella term used to describe progressive declines in cognition which may affect a person's behaviour and ability to perform activities of daily living. The most common form of dementia is Alzheimer's disease. More than 55 million persons are currently living with dementia worldwide.[1] Due to a rapidly aging population, it is projected that this number will rise to 78 million persons in 2030 and 139 million persons in 2050.[1] As there is currently no cure for dementia, there is growing urgency to develop and implement strategies to support the well-being of persons living with dementia and their care partners.

There is much diversity and heterogeneity across rural communities in Canada based on sociospatial characteristics (e.g., population size, population density, distance from urban centre), social representation, population demographics, and resource availability. [2,3] Although there is no clear consensus on what constitutes a rural community,[4] common definitions are based on a combination of population size, distance from an urban centre, and access to services. In Canada, the provincial "north" is a term commonly used to identify the northern and more sparsely populated (e.g., rural, remote) areas which may also experience similarities in arctic/subarctic climates, political marginalization, economic dependency on natural resource development, and larger proportions of Indigenous populations.[5] Persons living in rural and northern communities face increased barriers to physical activity (e.g., transportation, snow/ice) and have fewer opportunities to engage in physical activity through specialized programming,[6] contributing to an increased risk of noncommunicable disease and disability compared to their urban counterparts. Characteristics specific to the rural context may directly and/or indirectly influence physical activity opportunities and capabilities among older adults.[7] As northern and rural communities have a relatively greater proportion of older adults and a population that is

1  
2  
3 aging faster than the general population,[8] the need to develop strategies to address context-  
4  
5 specific barriers is urgent.  
6

7  
8 Physical activity is one of the best non-pharmacological strategies to support persons  
9  
10 living with dementia to remain active and enhance quality of life.[9,10] For older adults living  
11  
12 with dementia or mild cognitive impairment, which includes declines in memory, attention, and  
13  
14 cognitive functioning that exceed that typically expected by age or educational level, physical  
15  
16 activity can enhance and help maintain physical fitness, balance, mobility, functional ability, and  
17  
18 cognition.[11,12,13,14] In addition to physical and cognitive benefits, physical activity has  
19  
20 broader impacts including social inclusion and feelings of purpose, that contribute to overall  
21  
22 well-being and quality of life.[15,16] Barriers that can prevent persons living with dementia from  
23  
24 engaging in physical activity include stigma and lack of knowledge associated with  
25  
26 dementia.[17] Persons living with dementia were found to spend more of their time engaged in  
27  
28 sedentary behaviours when compared to age-matched cognitively healthy controls [18] and were  
29  
30 less likely to meet physical activity guidelines[19] when compared to persons with no cognitive  
31  
32 impairment.  
33  
34  
35  
36

37  
38 Despite the well-known benefits of physical activity, there remains a need to develop  
39  
40 physical activity interventions for persons living with dementia that address at each level of a  
41  
42 social-ecological model.[20] A social-ecological approach to physical activity considers the  
43  
44 interacting factors that influence opportunities at the levels of policy, community, organizational  
45  
46 (institutional), interpersonal, and individual.[21,22] For persons living with dementia, individual  
47  
48 issues affecting memory, declines in cognitive abilities, and changes in mobility may impact  
49  
50 physical activity behaviours differently across the course of the illness.[23,24,25] The barriers to  
51  
52 engagement in physical activity are amplified by the stigma surrounding diagnosis of dementia  
53  
54  
55  
56  
57  
58  
59  
60

1  
2  
3 (e.g., interpersonal relationships) and lack of knowledge by exercise providers on how to  
4 accommodate and adapt programming for varying and dynamic needs (e.g., lack of knowledge  
5 and programming barriers).[15] Prior research exploring physical activity barriers and  
6 opportunities for persons living with dementia has often focused on individual-level factors, with  
7 limited attention to environmental and community-specific factors affecting the inclusion of  
8 rural-dwelling persons living with dementia in physical activities.[22,25] A focus on  
9 environmental and systems-level factors is particularly important for understanding behaviour in  
10 rural and northern communities where the context shapes opportunities for active living. Taking  
11 a systems approach to physical activity promotion, exercise providers and allied health care  
12 providers who are aware of the unique needs of persons living dementia can be crucial enablers  
13 of physical activity for older adults by fostering positive (or negative) experiences and  
14 environments for physical activity.[15,26]

15  
16  
17 Care partners are uniquely positioned to raise awareness about factors influencing the  
18 behaviours and choices of persons living with dementia. The sharing of this person-specific  
19 knowledge with physical activity providers may inform intervention development and allow for  
20 tailoring of the program by healthcare professionals and allied health providers to better meet the  
21 individual needs of persons living with dementia.[25,26]

22  
23  
24 Therefore, the objectives of this study were to: 1) explore the factors influencing physical  
25 activity participation among persons living with dementia or mild cognitive impairment in rural  
26 and northern communities in Canada, and 2) identify locally-driven solutions to salient barriers  
27 to assist in the development of tools and resources for persons living with dementia, their care  
28 partners, allied health providers, and healthcare professionals in rural and northern communities  
29 in Canada.

## METHODS

**Patient and Public Involvement:** This work was guided by a large stakeholder advisory team including persons with dementia, care partners, physical activity providers, researchers, and health care experts. This advisory team provided direction to the research team which was used to inform design and guide this work.

**Study Context:** This study was nested within a larger national project aimed at developing resources and materials to support Dementia-Inclusive Choices for Exercise (DICE) project ([www.dementiaexercise.com](http://www.dementiaexercise.com)).<sup>[26,27]</sup> We report on the formative work conducted in northern British Columbia, Canada, highlighting the perspectives of those living in rural and northern geographies. Framed by a social ecological approach to understanding physical activity, opportunities for persons living with dementia are informed by interpersonal, intrapersonal, social and built environmental, and policy factors.<sup>[21]</sup> Thus, it is important to co-create knowledge with diverse communities based on population size and geographical location, aligning with basic principles of patient-oriented research.<sup>[28]</sup> Interviews and focus groups were conducted in two locations in northern British Columbia Canada; a rural community (population less than 10,000 persons) and a medium sized geographically isolated city (population less than 80,000 persons). Both communities are considered rural based on distance from urban centre and access to health services.<sup>[29]</sup>

**Participant Recruitment:** Purposive and snowball sampling strategies were employed to recruit exercise providers, allied health providers, persons living with dementia or mild cognitive impairment, and care partners for persons living with dementia. Purposive non-probability sampling, commonly used in qualitative studies, allowed for the invitation of participants who

1  
2  
3 were most representative or informative to participate.[30] Recruitment materials were initially  
4 shared in community locations (e.g., posters placed on notice boards at the Alzheimer Society  
5 and in a local memory clinic; notice placed in community newsletter) to recruit persons living  
6 with dementia and their family care partners. Local health systems stakeholders assisted in  
7 recruitment of healthcare professionals and exercise providers who delivered exercise programs  
8 for older adults and/or persons living with dementia (e.g., rehabilitation programs, geriatric  
9 outreach programs, community exercise programs).

10  
11  
12  
13  
14  
15  
16  
17  
18  
19  
20  
21  
22  
23  
24  
25  
26  
27  
28  
29  
30  
31  
32  
33  
34  
35  
36  
37  
38  
39  
40  
41  
42  
43  
44  
45  
46  
47  
48  
49  
50  
51  
52  
53  
54  
55  
56  
57  
58  
59  
60

Seven semi-structured focus groups and one interview were conducted with twenty-nine participants, including: healthcare professionals (e.g., physiotherapists, rehabilitation assistants, registered nurses; n=8); allied health providers experienced in providing community exercise programs (n=12); persons living with mild to moderate dementia or cognitive impairment (n=4); and care partners of persons living with dementia or cognitive impairment (n=5). Four focus groups involved both healthcare professionals and allied health providers, one focus group involved both care partners and a person living with dementia, one focus group involved only persons with dementia, and one focus group involved only care partners. The interview was conducted with a person living with dementia unable to participate in a focus group setting. Participant age and gender were not collected to protect participant confidentiality especially given the relatively small number of healthcare professionals and allied health providers in this region. Focus groups lasted approximately two hours for healthcare professionals and allied health providers and approximately one hour for care partners and/or persons living with dementia or cognitive impairment. Participants provided informed written consent/assent ahead of the session date and reconfirmed verbal consent/assent prior to the session commencing. All participants living with dementia were deemed to have the capacity to provide consent which

1  
2  
3 was reconfirmed by their care partners. While there is no set number of participants or focus  
4  
5 groups as a rule in qualitative research, twenty nine participants was considered an acceptable  
6  
7 number of participants for this exploratory research as it fits within the commonly accepted  
8  
9 sample size ranging from 15-30 participants for qualitative research.[31] At the conceptual level,  
10  
11 concordance was observed in findings across differing participant groups and across both sites,  
12  
13 suggesting that saturation was achieved.[32] Harmonized ethics approval was received for this  
14  
15 study from the University of Northern British Columbia and University of British Columbia  
16  
17 (H18-00392).  
18  
19

20  
21 **Focus Group Sessions:** Focus group sessions, tailored to the participant type, followed a semi-  
22  
23 structured guide based on previous iterations used by the research team.[27] The focus groups  
24  
25 were facilitated by an experienced moderator (SF) with support from a graduate student research  
26  
27 assistant (RF) who took notes and managed recording devices. The semi-structured approach  
28  
29 allowed probing into emerging issues and themes, where appropriate. Focus groups enabled  
30  
31 exploration of interactive social contexts and provided insight on participant perspectives and  
32  
33 attitudes.[33,34] Group processes helped participants identify and clarify their perspectives with  
34  
35 each other and encouraged increased depth of description and discussion among participants,  
36  
37 providing more detailed responses to prompts.[35] Two of the focus group scripts used are  
38  
39 available in supplemental file 1 (for persons with dementia) and supplemental file 2 (for allied  
40  
41 healthcare providers).  
42  
43  
44  
45

46  
47 **Data Analysis:** An inductive thematic analysis of transcripts was used guided by Braun and  
48  
49 Clarke's six steps.[36,37] Beginning with familiarization of the data, a multi-disciplinary team of  
50  
51 researchers experienced in qualitative analyses (SF [gerontology] and CP [exercise physiology])  
52  
53 along with a research trainee (KW [health sciences]) read and reread the transcripts, writing  
54  
55  
56  
57  
58  
59  
60

1  
2  
3 initial thoughts from the data (step 1). All three researchers (SF, CP, and KW) are women who  
4 live in northern BC. Each have their own lived experience interacting with and supporting  
5 persons living with dementia and care partners as well as experience interacting with community  
6 service providers. The engagement of team members from diverse backgrounds enable robust  
7 discussion and consideration of patterns in the data and understanding from various viewpoints  
8 (e.g., from the perspectives of supporting healthy aging, to optimizing physical activity and  
9 exercise opportunities). To capture broad perspectives on the data, researchers independently  
10 identified and coded the transcripts (step 2) and developed initial themes by identifying patterns  
11 in the data set (step 3). Initial themes were then discussed as a group to develop rich descriptions  
12 and definitions using a white board to map connections between ideas (step 4). Final themes  
13 were established and defined, with sub-themes generated as appropriate within each overall  
14 theme (step 5). Data extracts (quotes), identified to best describe each theme/subtheme, are  
15 presented with a narrative summary (step 6).  
16  
17  
18  
19  
20  
21  
22  
23  
24  
25  
26  
27  
28  
29  
30  
31  
32

33 Using the social ecological model as a guide,[21,38] themes were deductively mapped using a  
34 white board and post-it notes and plotted according to user, program, health system, and broader  
35 community (contextual) levels to describe the factors influencing physical activity for persons  
36 living with dementia. Locally driven mitigation strategies and solutions described by participants  
37 to overcome barriers to physical activity were identified across each of the four levels. Analysis  
38 was conducted using Microsoft Word and Excel software.  
39  
40  
41  
42  
43  
44  
45  
46  
47  
48  
49  
50  
51  
52  
53  
54  
55  
56  
57  
58  
59  
60

## RESULTS

Factors influencing participation in physical activity for persons living with dementia were organized into four themes according to the social ecological model: Northern and rural context, health system, physical activity programming, and program participant level (Figure 1). Identified challenges and mitigations strategies were also mapped to the social ecological model (Table 1).

### **Northern and rural context: Unique features of the northern and rural context in Canada**

**both promote and limit physical activity** The Canadian northern and rural environmental context underpinned all aspects concerning health and physical activity for persons living with dementia. The local and regional context shaped program opportunities, availability, accessibility, and preferences.

*Natural environment.* Elements including weather (e.g., harsh winter conditions and wildfires), geographic location (e.g., isolation from urban centres and from physical activity opportunities), wildlife (e.g., presence of bears, cougars, and moose), and lack of daylight in the winter months influenced willingness and abilities of persons living with dementia to engage in physical activity. One care partner noted: “By 7 o'clock it's really dark, and I don't really feel that safe going in the dark by myself ... the temperature in the winter might be okay, but it might a sheet of ice”. Participants reported the need to adapt to changes in weather to maintain daily physical activities including outdoor walking.

*I have to wear the tall boots. So, I get my boots on, that means they go right up to the knee and so you can stomp into the snow. Sometimes you put cleats on them so you don't slip. And I always have my poles. It's very important to have the poles. It's beautiful, you know. (Person living with dementia)*

Long-time residents of Canadian rural and northern communities described the easy access to natural environments including rivers, lakes, and forest trails as a facilitator of outdoor



1  
2  
3 physical activity engagement for all persons including those living with dementia. As one  
4  
5 participant explained:

6  
7  
8 *I used to do exercise that was more like go lift weights and workout and now it's like,*  
9 *no, unless it's fun. I like dancing. I like walking the dog in the forest or somewhere off-*  
10 *leash where I can just wander around in the trees and the mushrooms. It's hard to get*  
11 *me to go fast. I don't go fast, but you can get me to go up a hill (Person living with*  
12 *dementia)*

13  
14  
15 Further, one care partner of a person living with dementia emphasized how immersing  
16  
17 themselves in the natural environment contributed not only to their ability to be physically  
18  
19 active but also related to how they conceptualize and find positive meaning in activity as a  
20  
21 way to be outside and seek goals beyond fitness.  
22

23  
24  
25 *I like the freedom of being away from it all in the woods, on the water—that's really*  
26 *important. In the backyard, no phones. And you just respond as you go and you're*  
27 *thinking of something you want to do, you do it. That's freedom. That's exercise.*  
28 *That's a good feeling. (Care partner of person living with dementia)*  
29

30  
31  
32 *Built environment* Although a lack of facilities and vast geographic distance to the nearest  
33  
34 urban centre were mentioned as barriers, participants described some of the unique built  
35  
36 environmental features that facilitated physical activity. Participants valued the accessible  
37  
38 infrastructure in their community: *"We actually have this incredible sidewalk system here ...*  
39 *[it's] designed so that every street has access to this sidewalk system that is maintained by the*  
40 *municipality to get to downtown, to do grocery shopping, and so on"* (Person living with  
41  
42 dementia). Further, participants shared how city planners in their rural community had  
43  
44 considered the needs of an aging population when designing the sidewalk (e.g., cloverleaf and  
45  
46 crescent patterns) to purposefully support safe and accessible physical activity for persons  
47  
48 with cognitive impairments.  
49  
50  
51  
52  
53  
54  
55  
56  
57  
58  
59  
60

### **Health System: Limitations of the health system lead to development of local solutions**

The overarching structure of the health care system impacted access to physical activity opportunities through three main facets: the referral process and policies, communication processes, and resource availability. Each subsequently impacted physical activity opportunities for program end-users.

*Lack of capacity and mechanisms for referrals:* Healthcare professionals and allied health providers struggled with the process of referring persons with dementia to specialized physical activity programs due to lack of capacity and resources throughout the system (e.g., staffing, limited program offerings) and absence of clear mechanisms in place to facilitate the referral process. When responsibility and accountability for referrals was unclear, it led to inaccuracies and gaps in assessment documentation which subsequently resulted in delayed or failed referrals. In some cases, when exercise providers received inaccurate and incomplete documentation during the referral process, it resulted in duplication of health assessments and additional workload. One healthcare professional noted:

*What's on the piece of paper doesn't quite identify what the person's needs are. So, a lot of extra digging needs to go into that. So, whether the person needs to see a geriatrician which is more sort of the medical component, it's triaged that way.*  
(Healthcare Professional)

For persons with dementia and their care partners, the lack of a clear referral process or advice from their healthcare provider led to confusion and lack of awareness about where to seek trusted information about safe physical activity opportunities. One participant described their frustration noting:

*It's been an ongoing question, where can we get more information. "Read about it." Okay, we've read about it. Who can we talk to? "Alzheimer's group" or a contact or "your GP, he can help". We've been through all that and there isn't any.* (Care partner of person living with dementia)

Difficulty in communication and fragmented access to information leads to lack of knowledge:

Challenges with clear and consistent communication were recognized as a barrier across all participant groups. One participant described these communication challenges noting:

*Word finding difficulties depending on the type of dementia can be a challenge for the person who's struggling to communicate, and for other participants as well. Maybe the person with dementia who also has word finding difficulties they're not intentionally being dishonest, but their stories change depending on the wording that they're using because they can't find their words and then other participants are concerned for them because they just heard a story that's not necessarily true, but the person with dementia couldn't find the words to accurately tell what was going on. So, some communication barriers. (Allied health provider)*

Participants expressed a desire for access to resources and information specific to dementia, the disease process, and how to support physical activity opportunities that were safe and inclusive.

Persons living with dementia and care partners described the existing resources as inconsistent, inaccessible, or otherwise unavailable. One participant shared: *"My mother had Alzheimer's, my grandmother had Alzheimer's as well, and I've never come across any information that walks you through what to expect. That would be very helpful"* (Care partner of person living with dementia). While recognizing healthcare professionals as a key communication mechanism for information and educational resources about physical activity, one care partner shared:

*The professionals don't have the time for this [sharing information related to dementia], unless you have an appointment. Like if you're on a list, it could be 3 months, could be 6 months, it could be a year, or could be really soon. (Care partner of person living with dementia)*

In response, care partners connected informally to each other to promote knowledge sharing by leveraging community networks and using existing communication channels within the community. Close community connections, many based on decades of living in the same community, enabled persons living with dementia and their care partners to communicate their

1  
2  
3 needs directly to healthcare professionals and allied health providers through informal  
4 relationships. Within smaller and geographically isolated communities, participants described a  
5 lack of anonymity, noting it was common to run into each other at the grocery store, public  
6 events, or in their neighbourhood, allowing for informal connection and information exchange.  
7  
8 Participants shared print copies of resources regarding physical activity and communicated by  
9 telephone to help compensate for the lack of accessibility to information formally from  
10 healthcare professionals and exercise providers.  
11  
12  
13  
14  
15  
16  
17  
18  
19  
20  
21

22 Limited resources lead to ongoing need for flexibility, creativity, and advocacy: Participants  
23 emphasized the complexity of securing necessary resources to support high quality and  
24 sustainable exercise programming.  
25  
26  
27

28 *Maybe we touched on this when we talked about barriers and the priorities for the health*  
29 *care team at this team, education and community integration doesn't often come up as a*  
30 *high priority. It's very task-oriented health care. Like, this happened, give them this*  
31 *treatment, they're done. But helping with educating on, these are the things that are*  
32 *available in the community for you to participate in because this is going to be an*  
33 *ongoing—aging is not going to stop when you leave this hospital. Having more process-*  
34 *oriented approach and more education and more community integration, but*  
35 *unfortunately, due to resources that isn't always a priority. (Allied Health Provider)*  
36  
37  
38

39 Participants described the importance of flexibility and creativity to overcome the inability of the  
40 health systems to provide physical activity opportunities, often due to limited funding, lack of  
41 infrastructure, and substantial gaps in human resources. In particular, participants shared their  
42 frustrations surrounding the limited specialized dementia care and services due to the limited  
43 human resources. This is especially prevalent within small and heterogeneous populations, as  
44 one participant noted:  
45  
46  
47  
48  
49  
50  
51

52 *there's just one or two staff for a different, very broad population sometimes because*  
53 *they don't have the same levels of functioning, but we only have ... just the bare*  
54  
55  
56  
57  
58  
59  
60

1  
2  
3 *amount of staff, right. Maybe that's also a challenge. We don't have enough people*  
4 *(Allied Health Provider)*  
5

6 Inadequate human resources can also lead to lack of specialist knowledge regarding exercise and  
7 dementia, contributing to unmet goals and objectives of both the program providers as well as  
8 participants. The shortage and/or absence of trained care providers caused changes in program  
9 design commonly by adjusting from physical to psychosocial goals. The flexibility to adjust the  
10 focus of the program allowed activities to remain operational. One exercise provider described  
11 that when healthcare professionals were unable to provide formal rehabilitation programs or  
12 exercise providers were unavailable to provide structured activities in their community, they  
13 pivoted to offer a social program instead. However, in doing so, they were also aware of the need  
14 to provide supports that fell within their own scope of practice.  
15  
16  
17  
18  
19  
20  
21  
22  
23  
24  
25  
26

27 *We have to be really mindful in terms of each other's scopes, so we can't do exercise-*  
28 *whatever's called technically "exercise classes." However, we can do things that are fun*  
29 *and fitness, which would be like kick ball and badminton (Allied Health Provider)*  
30  
31

32 To mitigate the lack of trained formal healthcare professionals and exercise providers,  
33 community champions built capacity by engaging volunteers and student trainees. One  
34 participant emphasized that:  
35  
36  
37

38  
39 *Most of the groups ... we use the students for. And it was a student actually that made*  
40 *the falls group. He did all the prep for it, everything. Got it all in line and all the stuff*  
41 *out to the doctors. We just kept it. The same with the fit group; we just kept it. And*  
42 *they love it" ... "And it works well, too (Healthcare Professional)*  
43  
44

45 Participants described making use of public spaces such as local recreation centres to organize  
46 informal activity opportunities and participate in group programs in lieu of formal exercise  
47 facilities (e.g., fitness club, community recreation center), which may or may not be available.  
48  
49 In one community, participants shared their use of a public multipurpose area for physical  
50 activity.  
51  
52  
53  
54  
55  
56  
57  
58  
59  
60

1  
2  
3 *One of three recreation facilities ... [includes] a multi-purpose facility. There's tennis*  
4 *courts outside. There's community rooms where events could be held, meetings could be*  
5 *held. There's a gymnasium there. They do program sports, so you could go play at*  
6 *badminton" (Care partner of person living with dementia)*  
7  
8  
9  
10

## 11 **Physical activity programing: Flexibility is needed to adapt to diverse community needs**

12 **and preferences, as well as expertise available** Healthcare professionals and allied health  
13  
14 providers described the value of working towards defining physical activity programs including a  
15  
16 clear set of characteristics, naming, and the need for trained program staff. Addressing each  
17  
18 aspect is key to creating and sustaining a successful exercise program. However, challenges  
19  
20 experienced in northern and rural communities in Canada are described below.  
21  
22  
23  
24  
25  
26

27 Defining physical activity programs is needed but can affect accessibility for persons living with  
28 dementia: Participants discussed challenges when determining whether to define and clearly  
29  
30 label a physical activity program as focused and inclusive of persons living with dementia or to  
31  
32 keep the focus more generic. Use of a clear definition acknowledging a specific focus of the  
33  
34 program designed for persons living with dementia was thought to improve clarity in participant  
35  
36 eligibility and feelings of inclusion, it was also expressed that this may limit the willingness of  
37  
38 some persons living with dementia to attend due to the stigma associated with dementia and  
39  
40 cognitive impairment. This sentiment was expressed in relation to those living in small rural  
41  
42 Canadian settings, where some people who wished to keep their diagnosis of dementia  
43  
44 confidential were potentially risking their privacy if they attended a physical activity program  
45  
46 designed and labelled for persons living with dementia. The stigma associated with dementia was  
47  
48 mitigated in small communities by offering the programs at neutral locations within the  
49  
50 community, changing the language to enhance inclusion, and normalizing the environment. One  
51  
52  
53  
54  
55  
56  
57  
58  
59  
60

1  
2  
3 care partner commented that the stigma associated with dementia was still evident in their  
4  
5 community and impacted their choices in physical activity: *“And there’s a stigma attached to it*  
6  
7 *in our minds. Not necessarily that anymore, but there has been in our past lives -- a person not*  
8  
9 *right, something wrong upstairs, here in the cortex.”* (Care partner of person living with  
10  
11 dementia). One health care professional also noted *“If there’s an Alzheimer’s Group, but*  
12  
13 *somebody doesn’t like to acknowledge that they have Alzheimer’s then you might not want*  
14  
15 *to suggest that they go to an Alzheimer’s group...so that could actually be a barrier”* (Health  
16  
17 care professional).  
18  
19

20  
21 Participants also expressed that labelling a program as ‘exercise’ can be interpreted in  
22  
23 different ways. For some, ‘exercise’ may be viewed as an opportunity to enhance and maintain  
24  
25 health, while for others, exercise can be intimidating and exclusive. One exercise professional  
26  
27 described this issue:  
28  
29

30  
31 *I have to re-approach all the time. If I approach someone and say, “Do you want to*  
32  
33 *come exercise?” They’ll scoff at the thought of exercise. “I’m 94. I’m not going to*  
34  
35 *exercise, today.” But then if I say, “Hey, want to come play a game with me.” Then*  
36  
37 *they’re all for it* (Allied Health Provider)

38  
39 At the same time, the lack of a clear definition for exercise was not always perceived as  
40  
41 detrimental as it can allow for fluidity in roles. For rural communities in Canada with limited  
42  
43 capacity, flexibility in job roles and volunteer engagement allowed programs to continue to run.  
44  
45 For example, one participant described how labelling a program as a social activity allowed it to  
46  
47 be offered by a variety of providers:

48  
49 *We’re not physio. We do fun and fitness. Like [when] physio is unable to come one*  
50  
51 *morning because they’re doing other things or when they’re short staffed, then we do fun*  
52  
53 *and fitness, so we do a game, like bowling”* (Allied Health Provider)

54  
55 Balancing program design to meet everyone’s needs and expectations: No singular physical  
56  
57 activity program or method of delivery emerged as a one size fits all answer to ensure inclusivity  
58  
59

1  
2  
3 for all persons living with dementia, at all times, and in all locations. Instead, participants shared  
4 the importance of intentional decisions around program design and details including scheduling,  
5 program location, participant eligibility, and method of program delivery (e.g., standing, sitting,  
6 or mixed classes) to meet the needs of those within their area. These decisions can be difficult  
7 when serving a small but diverse group, as in rural communities in Canada, when balancing  
8 finite human and financial resources. If a program is too general, it may risk not being effective  
9 for anyone attending as noted by one exercise provider:

10  
11  
12  
13  
14  
15  
16  
17  
18  
19 *The problem is that ... I don't think that anybody's really getting enough individual*  
20 *program in order to actually make an impact ... Even with the stretching, they're not*  
21 *necessarily getting positioned in the exact right place, but it's one instructor and 20, 25*  
22 *people. So I think programming where you have a ratio ... depending on what the abilities*  
23 *of those four people are, or three people, the helper could be helping the one that's*  
24 *needing more assistance and that could travel (Allied Health Provider)*  
25  
26

27 Additionally, participants discussed the challenge of balancing routine and structure within the  
28 programs, keeping the program flexible enough to keep those participating engaged and meet  
29 their expectations while maintaining enough structure to achieve physical fitness goals.

30 Flexibility in program provision, program design and provider roles was identified as a  
31 mitigation strategy which enabled providers to be responsive to the needs and preferences of  
32 persons living with dementia, scheduling, and practitioner scope of practice.  
33

34  
35  
36  
37  
38  
39  
40  
41  
42 **Program participant level: Supportive providers with flexibility are needed to help persons**  
43 **with dementia overcome challenges and fears.** Participants shared unique experiences with  
44 physical activity based on the interaction between the rural environmental setting, the person  
45 living with dementia and their care partner where applicable.  
46  
47  
48  
49

50  
51 *Motivation and knowledge about physical activity:* Participation in physical activity requires a  
52 conscious investment of time and personal resources. Persons living with dementia and care  
53  
54  
55  
56  
57  
58  
59  
60



1  
2  
3 partners described difficulties balancing multiple demands and had difficulty prioritizing  
4  
5 physical activity due to other scheduled health related appointments or commitments. When  
6  
7 asked about what gets in the way of physical activity, one participant living with dementia  
8  
9 explained there were often “*Other activities that weren’t scheduled, or you’re already committed*  
10  
11 *to.*” Participants living with dementia noted the importance of a positive attitude and personal  
12  
13 motivation toward physical activity participation as a critical enabler, for example:  
14  
15

16  
17 *I would enjoy more exercise. They have to change it up so it’s not always the same*  
18 *because you do get bored. I don’t care who you are, you get bored, so if you change*  
19 *the program a little bit every once in a while, then you’re more likely to keep attending*  
20 *(Person living with dementia)*  
21

22  
23 Participants living with dementia further expressed how challenging it was to find trustworthy  
24  
25 information about physical activity, impacting their ability to engage in regular activity:  
26

27  
28 *You know, the world’s a big place and I think the internet has a lot of good*  
29 *information. I don’t know how to access that, but I know the girls do, and I think it*  
30 *gives you a wide variety of information and choices. I don’t know what other source. I*  
31 *mean, I’m sure there are other sources. I haven’t a doubt that’s the only one (Person*  
32 *living with dementia)*  
33

34  
35 Similarly, participants identified that having instructors who are knowledgeable about exercise  
36  
37 and familiar with supporting persons living with dementia to be active, would be an important  
38  
39 facilitator supporting their participation in physical activity.  
40

41  
42 *I would like to actually see whether or not they’ve got trainers there that could show me. I’m*  
43 *not comfortable going into a weight room thinking, “Oh, what I should be doing with*  
44 *this?.....That would be good if there were people there that would teach you how to use*  
45 *weights (Person living with dementia)*  
46

47 *Fear can prevent participation:* For persons living with dementia, a variety of fears were  
48  
49 reported which prevented engagement in physical activity programming. These fears included:  
50  
51 the fear of being institutionalized if the program was held within a long-term care facility, the  
52  
53 fear of getting lost when needing to take public transportation to attend an exercise class, and the  
54  
55  
56  
57  
58  
59  
60

1  
2  
3 fear of injury from falling. Care partners further expressed negative feelings towards physical  
4  
5 activity participation due to anticipation of the progressive loss of control and declining physical  
6  
7 abilities of the person living with dementia as their disease progressed. For one care partner, they  
8  
9 described how the fear not only led to distress, but that it was also an indicator for them of  
10  
11 disease progression.  
12  
13

14  
15 *Mom doesn't do a lot of exercise. She gets lost very quickly, now, and forgets where she*  
16 *is or where she's going. She's really nervous of falling. She's terrified of snow. Like if*  
17 *there's snow or ice, she doesn't want to walk in it or she gets really stressed. Like she'll*  
18 *panic because there's snow or ice. She's really nervous of falling down. That's her*  
19 *biggest thing that she's going to fall down. And with my mom, if she falls down, she*  
20 *doesn't get, from a crawl to a stand is sometimes impossible. My mom would stand up*  
21 *and it's really hard for her to stand up. And that's something, that for me has been an*  
22 *indicator with both my parents when they couldn't get up from getting down, whether it's*  
23 *in the bathtub or when it's something's on the floor and they go down to get it and then*  
24 *they're stuck and they can't figure out how to get up and it's—and then fear comes*  
25 *because they realize they can't get up, but they're like, "But I'm supposed to be able to*  
26 *get up and I can't get up." And so, I don't know how to explain it, except that it's*  
27 *terrifying for them, and it's heartbreaking to witness, but it's also heartbreaking for each*  
28 *of them. (Care partner of person with dementia)*  
29  
30

31  
32 In recognition that these fears are common for persons living with dementia, healthcare  
33  
34 professionals and allied health providers noted the importance for fall prevention training for  
35  
36 those individuals.  
37  
38

39 *Building up the confidence [of persons living with dementia] in terms of getting up from*  
40 *a fall I think is important because fear of falling is a barrier to a lot of community*  
41 *participation, recreation and leisure participation in particular is what I'm referring to,*  
42 *but yeah, fear of falling is a big barrier for getting out and then people are at risk for*  
43 *social isolation. (Allied Health Provider)*  
44  
45

## 46 47 **DISCUSSION**

48  
49 This study explored factors influencing physical activity participation for persons living  
50  
51 with dementia in northern and rural communities in Canada and the strategies implemented in  
52  
53 these settings to mitigate barriers to physical activity participation. From the perspectives of  
54  
55

1  
2  
3 healthcare professionals, allied health providers, persons living with mild to moderate dementia,  
4 and care partners, key points that emerged were the lack of health system support for physical  
5 activity participation, and substantial gaps in tailored exercise program offerings and knowledge  
6 needed to provide accessible, inclusive opportunities for physical activity. Often in rural and  
7 northern communities these challenges are compounded and interlinked (e.g., accessibility to use  
8 a neutral location to offer a program may not be available in the winter months or may  
9 experience scheduling challenges in the winter months due to competing demands for limited  
10 indoor space; reliability of public transportation may differ between winter and summer  
11 schedules or safety in walking outdoors may be affected by hours of sunlight by season or  
12 whether wildlife such as bears are active or hibernating).

13  
14  
15  
16  
17  
18  
19  
20  
21  
22  
23  
24  
25  
26 In response to the substantial gaps experienced at the systems level, community-driven  
27 initiatives emerged. Community-based solutions, developed in response to gaps in available  
28 services and supports, relied on a limited number of community champions to provide physical  
29 activity programming. These community-specific initiatives were organically tailored to address  
30 the needs of the community of focus with consideration of the unique environmental context and  
31 finite human and financial resources. Fear of injury and stigma associated with a dementia  
32 diagnosis demand a multi-program response with flexibility, inclusivity and knowledge, not only  
33 for persons living with dementia but also for care partners who support persons living with  
34 dementia to engage in physical activity.

35  
36  
37  
38  
39  
40  
41  
42  
43  
44  
45  
46  
47 The individual-level factors influencing physical activity for persons living with  
48 dementia, including fear, stigma, cognitive function, and lack of knowledge, are commonly  
49 reported in the literature.[25] While these are still true for people living in northern and rural  
50 communities in Canada, fear and stigma are heightened due to the smaller population size and  
51  
52  
53  
54  
55  
56  
57  
58  
59  
60

1  
2  
3 lack of dementia-related knowledge due to limited access to trained providers or appropriate  
4 facilities. With limited populations in rural communities, it can become increasingly difficult for  
5 person living with dementia and their care partners to protect their privacy as it is not possible to  
6 remain anonymous when attending community programming.[39] In some cases, especially  
7 when individuals perceive their actions may be observed and discussed by others in their rural  
8 communities, they may prefer to engage in group activities in a neighbouring community,  
9 however, this may involve substantial investment of resources for those in rural and northern  
10 communities, including travel time and costs.[39] Commonly in rural communities, while  
11 individual-level barriers persist, environmental and community-level factors create an additional  
12 barrier that must be overcome to engage in physical activity, which is particularly true for  
13 persons living with dementia.[ 40]

14  
15 Context is essential to understand the factors influencing physical activity participation  
16 for persons living with dementia in northern and rural communities in Canada. In alignment with  
17 our previous work, the natural environment can both enhance physical activity participation and  
18 exercise (e.g., proximity to outdoor recreation) and, at times, limit physical activity (e.g., winter  
19 weather, ice).[6] While the availability of facilities and accessible locations suitable for exercise  
20 provision and access to specialized exercise providers is a facilitator of physical activity for  
21 persons living with dementia in urban areas,[26] our findings highlight the near complete  
22 absence of such facilities and providers in northern and rural communities in BC. This reinforces  
23 the importance to consider the links between the availability of infrastructure, networks, and  
24 resources with the degree of urbanization in the community.[41] While it is common for exercise  
25 providers to have limited knowledge of dementia and training regarding inclusive practices in  
26 physical activities,[27] this is amplified in rural communities by the continued reliance on

1  
2  
3 exercise providers without formal training (e.g., rehabilitation or recreation providers) working  
4  
5 ‘off the side of their desk’ to meet community needs. The lack of trained and specialized staff  
6  
7 leads to inconsistent program content and availability, fragmentation of program accessibility  
8  
9 across different communities, and limited capacity for formal assessment. The lack of health  
10  
11 systems leadership, authority, regulation, and quality control specific to physical activity  
12  
13 programming have left individuals living in northern and rural communities in BC to take a  
14  
15 community-driven, grass-roots approach to support inclusion of persons living with dementia in  
16  
17 physical activity and an overreliance on non-profit community organizations. In response to the  
18  
19 lack of leadership from the health system to support northern and rural communities in BC,  
20  
21 individual community champions have emerged, focussed on building and enhancing  
22  
23 community-level programs to address existing deficits. When access to the program relies on  
24  
25 knowledge and awareness of community champions and informal networks, persons living with  
26  
27 dementia and care partners who are not well connected and already engaged in the community  
28  
29 may be unable to access physical activity programming. The issues identified in this study,  
30  
31 which are present at the individual, community, and system levels of the social-ecological model,  
32  
33 echo the priorities and Canadian call to action described by Njikiforuk (2018) to “support  
34  
35 equitable action on rural and remote physical activity promotion across Canada”. [42] Further  
36  
37 these findings warrant a collaborative response between communities and health systems to  
38  
39 enhance equity in the ability of persons living with dementia to access physical activity supports,  
40  
41 especially in Canadian northern and rural communities.  
42  
43  
44  
45  
46  
47  
48

49 This study provides insight into the factors affecting physical activity participation for  
50  
51 persons living with dementia involving participants across two rural and northern communities in  
52  
53 BC Canada. The engagement of diverse stakeholders in this geographic region using a  
54  
55  
56  
57  
58  
59  
60

1  
2  
3 qualitative approach allowed us to capture diverse perspectives on the existing deficits and has  
4 helped to identify gaps in tailored exercise program offerings and knowledge necessary to  
5 provide accessible, inclusive opportunities for physical activity. However, as the geographical  
6 focus of this work was limited to two northern and rural communities in Canada, findings may  
7 not be transferable to other communities such as urban centres or other countries with differing  
8 health care systems and resources. More research is needed to understand whether other northern  
9 and rural communities in Canada rely heavily on local community-specific initiatives. Further, a  
10 limitation of this study is the limited number of participants living with dementia or mild  
11 cognitive impairment who participated in this study (n=4/29). While allied health providers and  
12 healthcare professionals who participated in the study provided valuable reflections on the  
13 challenges they have observed, they are limited in their ability to comment specifically on  
14 individual-level factors and the lived experiences of persons living with dementia and their care.  
15  
16  
17  
18  
19  
20  
21  
22  
23  
24  
25  
26  
27  
28  
29

30  
31 In Canada, unintended consequences of pandemic restrictions (e.g., physical distancing  
32 protocols) include reductions of physical activity.[43, 44] Disruptions in daily routines and  
33 limited engagement in physical activity during the COVID-19 pandemic have been reported to  
34 severely impacted persons living with dementia.[45] Emerging evidence suggests that  
35 interdisciplinary prevention approaches to address physical inactivity related to pandemic  
36 restrictions and isolation are urgently needed especially for persons living with dementia.[46] As  
37 our work was conducted prior to the COVID-19 pandemic, future research is needed to examine  
38 how pandemic restrictions and social distancing protocols were experienced in rural and northern  
39 communities in Canada and subsequently how COVID-19 pandemic may have impacted the  
40 ability of persons with dementia to engage in physical activity and have impacted the provision  
41 of local community-driven initiatives.  
42  
43  
44  
45  
46  
47  
48  
49  
50  
51  
52  
53  
54  
55  
56  
57  
58  
59  
60

## CONCLUSIONS

Physical activity opportunities and experiences for persons living with dementia living in northern and rural communities in Canada are shaped by the environmental context and limited accessibility to specialized programming. Local champions risk burnout by working to fill gaps left by absent health and non-profit sectors in small communities, limiting the long-term capacity and support in northern and rural communities for growing number of persons aging with dementia in Canada. It is important to support existing community leaders in a way that respects local knowledge and expertise.

1  
2  
3 **Figure 1 Legend:** Key findings by theme organized according to the social ecological model  
4  
5  
6  
7  
8  
9  
10  
11  
12  
13  
14  
15  
16  
17  
18  
19  
20  
21  
22  
23  
24  
25  
26  
27  
28  
29  
30  
31  
32  
33  
34  
35  
36  
37  
38  
39  
40  
41  
42  
43  
44  
45  
46  
47  
48  
49  
50  
51  
52  
53  
54  
55  
56  
57  
58  
59  
60



1  
2  
3 **Contributorship Statement:** All authors were actively engaged in this project in accordance  
4 with the ICMJE guidelines for authorship. Freeman and Middleton were involved in all aspects  
5 of this research. Pelletier was involved in all aspects of the manuscript development including  
6 data analysis, writing, and editing. Bechard was involved in planning the project, data collection,  
7 and editing of the manuscript. Regan was involved in planning the project and editing of the  
8 manuscript. Ward was involved in data analysis, drafting, and editing the manuscript. Somani  
9 was involved in drafting and editing the manuscript.  
10  
11  
12  
13  
14  
15  
16  
17  
18  
19  
20

21 **Competing interests:** No competing interest.  
22  
23  
24  
25

26 **Funding:** This study was supported by grants received from the Alzheimer's Society Research  
27 Program and from the Canadian Institute for Health Research award number PEH 157075.  
28  
29  
30  
31  
32

33 **Data sharing Statement:** No additional data available.  
34  
35  
36  
37

38 **Patient and Public Involvement:** Our work is guided by a large stakeholder advisory team  
39 including persons with dementia, care partners, physical activity providers, researchers, and  
40 health care experts. We wish to acknowledge and thank all study participants, members of the  
41 DICE team, and Rebecca Ferris (RF) for her support.  
42  
43  
44  
45  
46  
47  
48  
49  
50  
51  
52  
53  
54  
55  
56  
57  
58  
59  
60

## References

- [1] World Health Organization. Dementia fact sheet. World Health Organization 2021. <https://www.who.int/news-room/fact-sheets/detail/dementia>(accessed Sep 2021).
- [2] Laurin, F., Pronovost, S., & Carrier, M. (2020). The end of the urban-rural dichotomy? Towards a new regional typology for SME performance. *J Rural Stud*, 80, 53-75.
- [3] Keating, N., & Phillips, J. (2008). A critical human ecology perspective on rural ageing. Rural ageing: A good place to grow old, 1-10.
- [4] MacGregor-Fors I, Vázquez LB. Revisiting ‘rural’. *Sci Total Environ* 2020;741:132789. doi:10.1016/j.scitotenv.2019.06.135.
- [5] Coates K, Poelzer G. The next northern challenge: the reality of the provincial north. Macdonald-Laurier Institute publication 2014 April. <https://www.macdonaldlaurier.ca/files/pdf/MLITheProvincialNorth04-14-Final.pdf> (accessed Aug 2021).
- [6] Ward K, Pousette A, Pelletier CA. Not Everybody’s an Athlete, But They Certainly Can Move”: Facilitators of Physical Activity Maintenance in Older Adults in a Northern and Rural Setting. *J Aging Phys Act* 2020;28:6: 854-863. doi:10.1123/japa.2019-0393.
- [7] Winterton, R., Warburton, J., Keating, N., Petersen, M., Berg, T., & Wilson, J. (2016). Understanding the influence of community characteristics on wellness for rural older adults: A meta-synthesis. *J Rural Stud*, 45, 320-327.
- [8] Northern Health Authority. (2015) Healthy Aging in the North: Action Plan. Northern Health Authority 2015. [https://www.northernhealth.ca/sites/northern\\_health/files/health-information/seniors/documents/healthy-aging-in-the-north-action-plan-2015.pdf](https://www.northernhealth.ca/sites/northern_health/files/health-information/seniors/documents/healthy-aging-in-the-north-action-plan-2015.pdf) (accessed Aug 2021).
- [9] Vedel I, Sheets D, McAiney C, et al. CCCDTD5: Individual and community-based psychosocial and other non-pharmacological interventions to support persons living with dementia and their caregivers. *Alzheimer's & Dementia: Translational Research & Clinical Interventions* 2020;6:1e12086. doi:10.1002/trc2.12086.
- [10] Alzheimer Society of Canada. Staying Physically active. <https://alzheimer.ca/en/help-support/im-living-dementia/living-well-dementia/staying-physically-active> (accessed Sep 2021).
- [11] Blankevoort CG, Van Heuvelen MJ, Boersma F, et al. Review of effects of physical activity on strength, balance, mobility and ADL performance in elderly subjects with dementia. *Dement Geriatr Cogn Disord* 2010;30:392–402. doi:10.1159/000321357.
- [12] Eshkoor SA, Hamid, TA, Mun, CY, et al. (2015). Mild cognitive impairment and its management in older people. *Clin Interv Aging* 2015;10:687. doi:10.2145/CIA.S73922.

- 1  
2  
3 [13] Ginis KA, Heisz J, Spence JC, et al. Formulation of evidence-based messages to  
4 promote the use of physical activity to prevent and manage Alzheimer's disease. *BMC*  
5 *Public Health* 2017;17:209. doi:10.1186/s12889-017-4090-5.  
6  
7 [14] Erickson KI, Hillman C, Stillman CM, et al. Physical activity, cognition, and brain  
8 outcomes: a review of the 2018 physical activity guidelines. *Med Sci Sports Exerc*  
9 2019;51:6:1242. doi:10.1249/MSS.0000000000001936.  
10  
11 [15] Malthouse R, Fox F. Exploring experiences of physical activity among people with  
12 Alzheimer's disease and their spouse carers: a qualitative study. *Physiotherapy*  
13 2014;100:169-175. doi:10.1016/j.physio.2013.10.002.  
14  
15 [16] Cedervall Y, Torres S, Åberg AC. Maintaining well-being and selfhood through  
16 physical activity: experiences of people with mild Alzheimer's disease. *Aging Ment*  
17 *Health* 2015;19:8: 679-688. doi: 10.1080/13607863.2014.962004.  
18  
19 [17] Kontos P, Grigorovich A, Dupuis S, et al. Raising the curtain on stigma associated  
20 with dementia: fostering a new cultural imaginary for a more inclusive society. *Crit*  
21 *Public Health* 2020;30:91-102. doi:10.1080/09581596.2018.1508822.  
22  
23 [18] Hartman YAW, Karssemeijer EGA, Van Diepen LAM, et al. Dementia Patients Are  
24 More Sedentary and Less Physically Active than Age- and Sex-Matched Cognitively  
25 Healthy Older Adults. *Dement Geriatr Cogn Disord* 2018;46:81-89.  
26 doi:10.1159/000491995.  
27  
28 [19] Laurin D, Verreault R, Lindsay J, et al. Physical activity and risk of cognitive  
29 impairment and dementia in elderly persons. *Arch Neurol* 2001;58:498-504.  
30 doi:10.1001/archneur.58.3.498.  
31  
32 [20] Bowes A, Dawson A, Jepson R, et al. Physical activity for people with dementia: a  
33 scoping study. *BMC Geriatr* 2013;13:1-10. doi: 10.1186/1471-2318-13-129.  
34  
35 [21] McLeroy KR, Bibeau D, Steckler A, et al. An ecological perspective on health  
36 promotion programs. *Health Educ Q* 1988;15:351-377  
37 doi:10.1177/109019818801500401.  
38  
39 [22] Stubbs B, Eggermont L, Soundy A, et al. What are the factors associated with physical  
40 activity (PA) participation in community dwelling adults with dementia? A systematic  
41 review of PA correlates. *Arch Gerontol Geriatr* 2014;59:2:195-203. doi:  
42 10.1016/j.archger.2014.06.006.  
43  
44 [23] Hancox JE, van der Wardt V, Pollock K, et al. Factors influencing adherence to home-  
45 based strength and balance exercises among older adults with mild cognitive  
46 impairment and early dementia: promoting activity, independence and stability in early  
47 dementia (PrAISED). *PLoS one* 2019;14:e0217387.  
48 <https://doi.org/10.1371/journal.pone.0217387>.  
49  
50 [24] Denning T, Thomas A. Oxford textbook of old age psychiatry. Oxford University Press  
51 2013:1-823.  
52  
53 [25] van Alphen HJ, Hortobagyi T, van Heuvelen MJ. Barriers, motivators, and facilitators  
54 of physical activity in dementia patients: a systematic review. *Arch Gerontol Geriatr*  
55 2016;66:109-118. doi:10.1016/j.archger.2016.05.008.  
56  
57  
58  
59

- 1  
2  
3  
4 [26] Hobson N, Dupuis SL, Giangregorio LM, et al. Perceived Facilitators and Barriers to  
5 Exercise Among Older Adults With Mild Cognitive Impairment and Early Dementia.  
6 *J Aging Phys Act* 2020;28:2:208-218. doi:10.1123/japa.2019-0010.
- 7 [27] Bechard LE, McDougall A, Mitchell C, et al. Dementia and mild cognitive impairment  
8 inclusive exercise: perceptions, experiences, and needs of community exercise  
9 providers. *PLOS ONE* 2020;15: e0238187. doi:[10.1371/journal.pone.0238187](https://doi.org/10.1371/journal.pone.0238187).
- 10 [28] Canadian Institutes of Health Research. Strategy for Patient-Oriented Research:  
11 Patient Engagement Framework. [https://cihr-irsc.gc.ca/e/documents/spor\\_framework-](https://cihr-irsc.gc.ca/e/documents/spor_framework-en.pdf)  
12 [en.pdf](https://cihr-irsc.gc.ca/e/documents/spor_framework-en.pdf) (accessed Sept 2021).
- 13 [29] Rural Coordination Centre of BC. Rural Practice Subsidiary Agreement.  
14 <https://rccbc.ca/rccbc/about-the-jsc/rsa-communities/> (accessed Sept 2021).
- 15 [30] Polit DF, Beck CT. *Nursing research: Principles and methods*. Lippincott Williams &  
16 Wilkins 2004;729.
- 17 [31] Braun, V., & Clarke, V. (2013). *Successful qualitative research: A practical guide for*  
18 *beginners*. Sage.
- 19 [32] Denzin, N. K., & Lincoln, Y. S. (Eds.). (2011). *The Sage handbook of qualitative*  
20 *research*. Sage.
- 21 [33] Morgan DL. *Planning and research design for focus groups. Focus groups as*  
22 *qualitative research* 1997;16.
- 23 [34] Wong LP. Focus group discussion: a tool for health and medical research. *Singapore*  
24 *Med J* 2008;49:256-60.
- 25 [35] Tausch AP, Menold N. Methodological aspects of focus groups in health research:  
26 results of qualitative interviews with focus group moderators. *Glob Qual Nurs Res*  
27 2016;3: doi:10.1177/2333393616630466.
- 28 [36] Clarke V, Braun V. *Thematic analysis*. In Encyclopedia of critical psychology.  
29 Springer New York NY 2014;1947-1952.
- 30 [37] Braun V, Clarke V. *Using thematic analysis in psychology. Qual Res Psychol*  
31 2006;3:2:77-101. doi: 10.1191/1478088706qp063oa.
- 32 [38] Spence JC, Lee RE. (2003). Toward a comprehensive model of physical activity.  
33 *Psychol Sport Exerc* 2003;4:7-24. doi: 10.1016/S1469-0292(02)00014-6.
- 34 [39] Morgan, D. G., Semchuk, K. M., Stewart, N. J., & D'arcy, C. (2002). Rural families  
35 caring for a relative with dementia: barriers to use of formal services. *Social science &*  
36 *medicine*, 55(7), 1129-1142.
- 37 [40] Pelletier CA, White N, Duchesne A, et al. Barriers to physical activity for adults in  
38 rural and urban Canada: A cross-sectional comparison. *SSM Population Health*  
39 2021;6:100964. doi: [10.1016/j.ssmph.2021.100964](https://doi.org/10.1016/j.ssmph.2021.100964).
- 40 [41] Gansefort, D., Brand, T., Princk, C., & Zeeb, H. (2018). Community readiness for the  
41 promotion of physical activity in older adults—A cross-sectional comparison of rural  
42 and urban communities. *International journal of environmental research and public*  
43 *health*, 15(3), 453.

- 1  
2  
3 [42] Nykiforuk Candace, I. J., Kayla, A., Sara, B., Wayne, C., Tracey, G., Jason, G., ... &  
4 Jonathan, M. (2018). Evidence synthesis Promotion of physical activity in rural,  
5 remote and northern settings: a Canadian call to action. *Health Promotion and Chronic  
6 Disease Prevention in Canada: Research, Policy and Practice*, 38(11), 419.  
7  
8 [43] Di Sebastiano, K. M., Chulak-Bozzer, T., Vanderloo, L. M., & Faulkner, G. (2020).  
9 Don't walk so close to me: physical distancing and adult physical activity in  
10 Canada. *Frontiers in Psychology*, 1895.  
11  
12 [44] Gierc, M., Riazi, N. A., Fagan, M. J., Di Sebastiano, K. M., Kandola, M., Priebe, C.  
13 S., ... & Faulkner, G. (2021). Strange days: adult physical activity and mental health in  
14 the first two months of the COVID-19 pandemic. *Frontiers in Public Health*, 9, 325.  
15  
16 [45] Bacsu, J. D. R., O'Connell, M. E., Webster, C., Poole, L., Wighton, M. B., &  
17 Sivananthan, S. (2021). A scoping review of COVID-19 experiences of people living  
18 with dementia. *Canadian Journal of Public Health*, 112(3), 400-411.  
19  
20 [46] Müller, P., Achraf, A., Zou, L., Apfelbacher, C., Erickson, K. I., & Müller, N. G.  
21 (2020). COVID-19, physical (in-) activity, and dementia prevention. *Alzheimer's &  
22 Dementia: Translational Research & Clinical Interventions*, 6(1), e12091.  
23  
24  
25  
26  
27  
28  
29  
30  
31  
32  
33  
34  
35  
36  
37  
38  
39  
40  
41  
42  
43  
44  
45  
46  
47  
48  
49  
50  
51  
52  
53  
54  
55  
56  
57  
58  
59  
60

Table 1: Identified challenges and mitigations strategies mapped to the social ecological model

| Level                             | Identified Challenges                                                                                                                                                                               | Mitigation Strategies                                                                                                                                                                                                                                                                                                                                                                                      |
|-----------------------------------|-----------------------------------------------------------------------------------------------------------------------------------------------------------------------------------------------------|------------------------------------------------------------------------------------------------------------------------------------------------------------------------------------------------------------------------------------------------------------------------------------------------------------------------------------------------------------------------------------------------------------|
| <b>Northern and Rural Context</b> | <ul style="list-style-type: none"> <li>• Winter weather and conditions</li> <li>• Inaccessible built environment</li> <li>• Lack of specialized facilities and distance to opportunities</li> </ul> | <ul style="list-style-type: none"> <li>• Appropriate clothing and footwear, knowledge on strategies for being active and staying safe (e.g., walking on ice to prevent falls)</li> <li>• Adjust to seasonal activities</li> <li>• Advocate for connected pathways and accessible sidewalks</li> <li>• Use public transit, share limited facilities between social and physical activity program</li> </ul> |
| <b>Health System</b>              | <ul style="list-style-type: none"> <li>• Fragmented Communication Process</li> <li>• Inconsistent Referral Process</li> </ul>                                                                       | <ul style="list-style-type: none"> <li>• Community champions leverage informal networks</li> <li>• Take advantage of gaps to allow flexibility in community-driven ground-up response (e.g., include persons identified to potentially benefit from support informally connected through personal and community networks in contrast to requiring formal referral from locum practitioner)</li> </ul>      |
| <b>Physical Activity Program</b>  | <ul style="list-style-type: none"> <li>• Balancing routine and structure with participant choice and autonomy</li> </ul>                                                                            | <ul style="list-style-type: none"> <li>• Flexibility to allow adjustment to cognitive and physical abilities of participants</li> <li>• Accommodation of diverse abilities in mixed classes and/or by team instruction</li> </ul>                                                                                                                                                                          |
|                                   | <ul style="list-style-type: none"> <li>• Lack of consistency in programming</li> </ul>                                                                                                              | <ul style="list-style-type: none"> <li>• Develop informal work-arounds through provider collaboration (e.g., job sharing, willingness to work outside scope of practice)</li> <li>• Program scheduling responsive to participant needs, offer when and where demand is high</li> <li>• Engagement of volunteers</li> </ul>                                                                                 |
|                                   | <ul style="list-style-type: none"> <li>• Lack of definition of program, and meaning of physical activity and exercise</li> </ul>                                                                    | <ul style="list-style-type: none"> <li>• Allow for flexibility in program provision (switch from physical to psychosocial goals when formal exercise provider unavailable)</li> <li>• Accept that no one program is everything to everyone</li> </ul>                                                                                                                                                      |
|                                   | <ul style="list-style-type: none"> <li>• Lack of accessibility to reliable information source</li> </ul>                                                                                            | <ul style="list-style-type: none"> <li>• Knowledge sharing occurs within community social network</li> <li>• Maintain traditional communication strategies (mail out of print activity book, person to person telephone connection)</li> </ul>                                                                                                                                                             |
|                                   | <ul style="list-style-type: none"> <li>• Lack of resources</li> </ul>                                                                                                                               | <ul style="list-style-type: none"> <li>• Education and training provided by multiple sources</li> </ul>                                                                                                                                                                                                                                                                                                    |

1  
2  
3  
4  
5  
6  
7  
8  
9  
10  
11  
12  
13  
14  
15  
16  
17  
18  
19  
20  
21  
22  
23  
24  
25  
26  
27  
28  
29  
30  
31  
32  
33  
34  
35  
36  
37  
38  
39  
40  
41  
42  
43  
44  
45  
46  
47

|                            |                                                                                                                                                                                                                                                                                                                                                                                                                                                                               |
|----------------------------|-------------------------------------------------------------------------------------------------------------------------------------------------------------------------------------------------------------------------------------------------------------------------------------------------------------------------------------------------------------------------------------------------------------------------------------------------------------------------------|
|                            | <ul style="list-style-type: none"> <li>• Flexible and adaptable job roles and volunteer engagement to address human resource capacity</li> <li>• Provider collaboration and sharing of limited resources across programs</li> </ul>                                                                                                                                                                                                                                           |
| <b>Program Participant</b> | <ul style="list-style-type: none"> <li>• Stigma of dementia</li> </ul> <ul style="list-style-type: none"> <li>• Offer program in neutral community location</li> <li>• Modify language to describe program to enhance inclusion for persons with dementia</li> <li>• Improve knowledge of benefits of exercise by participant and/or care partner</li> </ul>                                                                                                                  |
|                            | <ul style="list-style-type: none"> <li>• Perception of safety</li> </ul> <ul style="list-style-type: none"> <li>• Acknowledge fear and provide tailored programming support</li> <li>• Education and training on risk</li> <li>• Confidence and trust in program providers</li> </ul>                                                                                                                                                                                         |
|                            | <ul style="list-style-type: none"> <li>• Scheduling priorities</li> </ul> <ul style="list-style-type: none"> <li>• Participant and/or care partner awareness of program availability and benefits</li> <li>• Multiple programming options</li> <li>• Flexibility among community health providers to accommodate participant scheduling needs</li> <li>• Participants and care partners perceive physical activity as meaningful</li> <li>• Transportation support</li> </ul> |

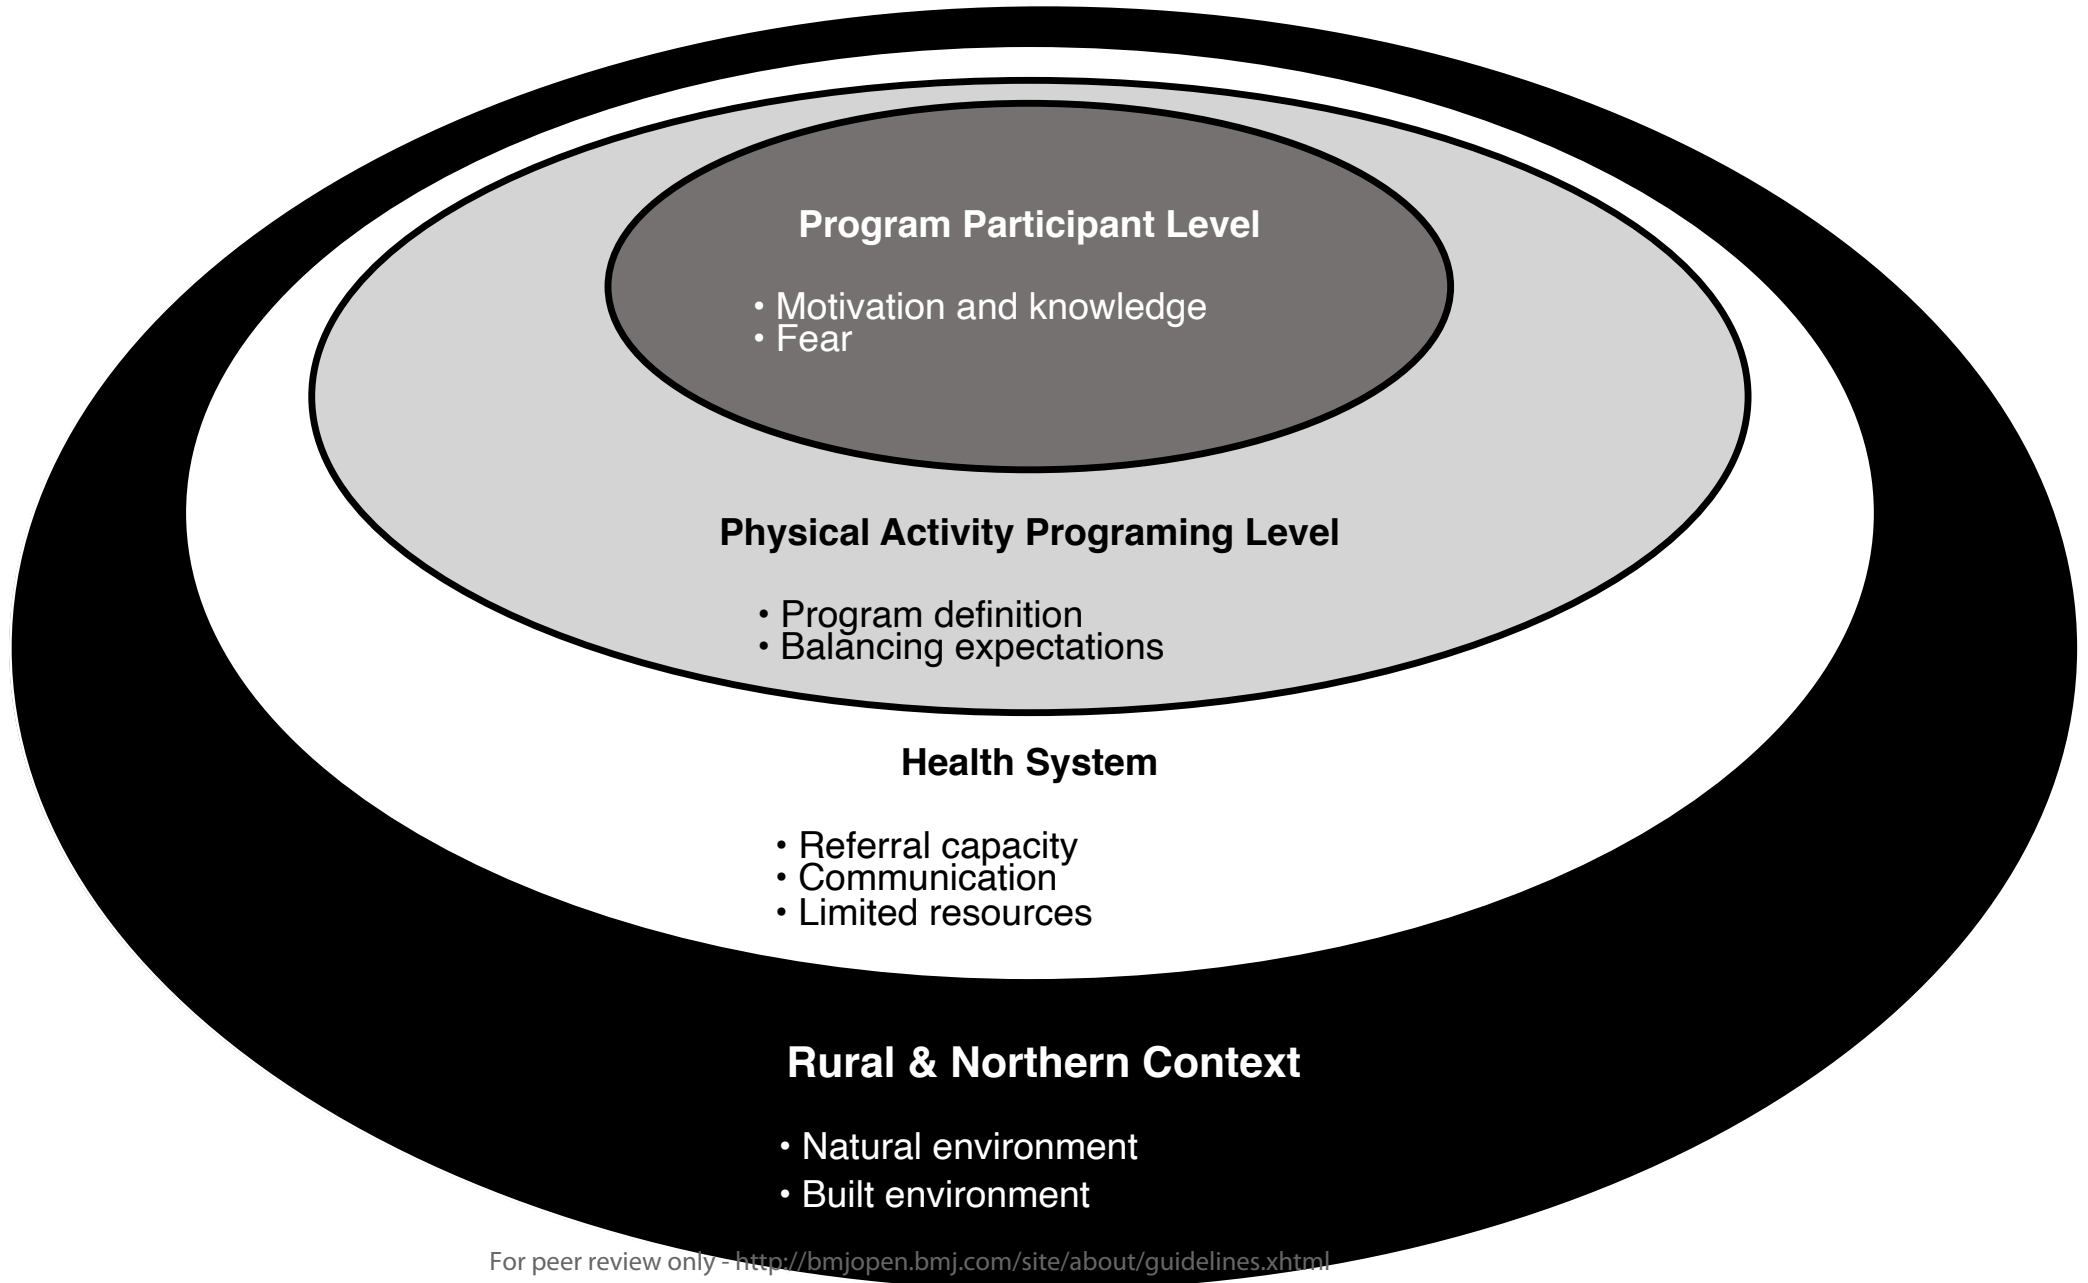

**Program Participant Level**

- Motivation and knowledge
- Fear

**Physical Activity Programing Level**

- Program definition
- Balancing expectations

**Health System**

- Referral capacity
- Communication
- Limited resources

**Rural & Northern Context**

- Natural environment
- Built environment

1  
2  
3  
4  
5  
6  
7  
8  
9  
10  
11  
12  
13  
14  
15  
16  
17  
18  
19  
20  
21  
22  
23  
24  
25  
26  
27  
28  
29  
30  
31  
32  
33  
34  
35  
36  
37  
38  
39  
40  
41



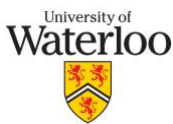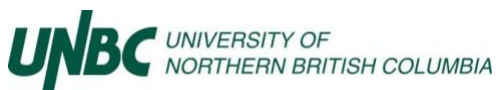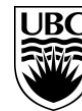

Expanding Exercise Opportunities for Persons living with dementia

**(FOCUS GROUP DISCUSSION SCRIPT AND QUESTIONS)**

PERSONS WITH MCI/DEMENCIA *Start with some icebreakers to get the group more acquainted with one another.*

1. What does the word exercise mean to you?
2. Do you feel that physical activity is different from exercise, and if so how?
3. What are some exercises that you do?
  - a. Potential prompts:
    - i. Where do you do these exercises?
    - ii. Who do you do these exercises with?
    - iii. How often do you do these exercises?
    - iv. What time of day do you prefer to exercise?
4. Tell me about the things that you do that would be considered physical activity?
  - a. Potential prompts:
    - i. Where do you do this?
    - ii. With who?
    - iii. How often?
5. Do you have any ideas about how physical activity or exercise might affect your health?
  - a. Potential prompts:
    - i. Effects on heart health
    - ii. Effects on bone or joint health?
    - iii. Effects on sleep?
    - iv. Effects on mood?
6. Do you have any ideas about how physical activity or exercise might affect your thinking ability?
7. From your perspective, are there any risks you are worried about from doing physical activity or exercise?
8. Tell me about any additional physical activity or exercise that you would like to do but are not doing now.

Prompts:

  - a. What type of physical activity or exercise?
  - b. Where would you like to do the physical activity or exercise?
  - c. Who would you like to do the physical activity or exercise with?
  - d. How much would you like to exercise?

1  
2  
3 9. What would help you get more physically active?  
4

5  
6 10. What gets in the way of you doing physical activity or exercise?  
7

8 11. Who do you look to for advice about the things you can do to improve your health?  
9

10 12. Who do you look to for advice about physical activity and exercise?  
11  
12  
13  
14  
15  
16  
17  
18  
19  
20  
21  
22  
23  
24  
25  
26  
27  
28  
29  
30  
31  
32  
33  
34  
35  
36  
37  
38  
39  
40  
41  
42  
43  
44  
45  
46  
47  
48  
49  
50  
51  
52  
53  
54  
55  
56  
57  
58  
59  
60

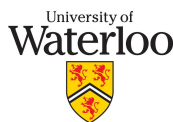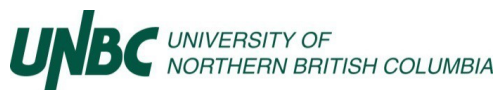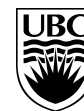

Expanding Exercise Opportunities for Persons living with dementia

**(FOCUS GROUP DISCUSSION SCRIPT AND QUESTIONS)**

---

ALLIED HEALTH PROFESSIONALS WHO PROVIDE SERVICES TO PEOPLE WITH MCI/DEMENCIA

---

1. What is your role in the health and wellbeing of people with dementia?
2. What is your role in prescribing or suggesting exercise to people with dementia?
3. What do you know about the benefits of physical activity and exercise to the health of people with dementia?
4. What do you know about the benefits of physical activity and exercise to the thinking ability of people with dementia?
5. Tell me about how you currently talk about and prescribe or suggest exercise to people with dementia?
  - Prompts:
    - a. Do you discuss their current exercise habits?
    - b. Do you suggest exercise for people with dementia?
    - c. Do you suggest specific frequencies or intensities of exercise?
    - d. Do you refer people with dementia to specific people or programs?
6. What are the barriers to discussing and prescribing/suggesting exercise to people with dementia?
7. What would you need in order to better discuss and prescribe/suggest exercise to people with dementia?
8. Who should be discussing and prescribing/suggesting exercise to people with dementia?
  - Prompts: Physician, nurse, PT/OT, kinesiologist or CEP, trainer, other?
9. Describe the ideal physical activity or exercise program for people with dementia.
  - a. Where would the physical activity or exercise take place?
  - b. Who would the person with dementia do the physical activity or exercise with?
  - c. How often would the person with dementia do this physical activity or exercise?
  - d. When should the physical activity or exercise take place?
  - e. Should exercise programs for people with dementia require referral or be open to all?
10. What are some challenges for people with dementia to be physically active?
11. What do you think would make it easier for people with dementia to be physically active?

**Supplementary File 1:** Author response to consolidated criteria for reporting qualitative studies (COREQ): 32-item checklist

| No                                             | Item                                     | Author Response                                                                                                                                                                                                                                                                                                                                               |
|------------------------------------------------|------------------------------------------|---------------------------------------------------------------------------------------------------------------------------------------------------------------------------------------------------------------------------------------------------------------------------------------------------------------------------------------------------------------|
| <b>Domain 1: Research team and reflexivity</b> |                                          |                                                                                                                                                                                                                                                                                                                                                               |
| Personal Characteristics                       |                                          |                                                                                                                                                                                                                                                                                                                                                               |
| 1.                                             | Interviewer/facilitator                  | SF conducted all interviews. p. 8                                                                                                                                                                                                                                                                                                                             |
| 2.                                             | Credentials                              | SF has a PhD and is experienced in conducting qualitative research.                                                                                                                                                                                                                                                                                           |
| 3.                                             | Occupation                               | SF is an Associate Professor in the School of Nursing at UNBC.                                                                                                                                                                                                                                                                                                |
| 4.                                             | Gender                                   | Female                                                                                                                                                                                                                                                                                                                                                        |
| 5.                                             | Experience and training                  | SF has previous training in qualitative research and has completed multiple qualitative research studies. p. 8                                                                                                                                                                                                                                                |
| Relationship with participants                 |                                          |                                                                                                                                                                                                                                                                                                                                                               |
| 6.                                             | Relationship established                 | None                                                                                                                                                                                                                                                                                                                                                          |
| 7.                                             | Participant knowledge of the interviewer | The participants knew that the interviews and focus groups were being conducted to learn from participants about their perspectives and experiences with exercise involving persons with dementia.                                                                                                                                                            |
| 8.                                             | Interviewer characteristics              | None                                                                                                                                                                                                                                                                                                                                                          |
| <b>Domain 2: study design</b>                  |                                          |                                                                                                                                                                                                                                                                                                                                                               |
| Theoretical framework                          |                                          |                                                                                                                                                                                                                                                                                                                                                               |
| 9.                                             | Methodological orientation and Theory    | Thematic analysis guided by Braun and Clarke's 6 steps (see p.7-8).<br>-- Clarke V, Braun V. Thematic analysis. In Encyclopedia of critical psychology. Springer New York NY 2014;1947-1952.<br>-- Braun V, Clarke V. Using thematic analysis in psychology. Qual Res Psychol 2006;3:2:77-101. doi: 10.1191/1478088706qp063oa.                                |
| Participant selection                          |                                          |                                                                                                                                                                                                                                                                                                                                                               |
| 10.                                            | Sampling                                 | Purposive, non-probability sampling, p. 6                                                                                                                                                                                                                                                                                                                     |
| 11.                                            | Method of approach                       | Snowball approach - E-mail, posters, word of mouth, p. 6                                                                                                                                                                                                                                                                                                      |
| 12.                                            | Sample size                              | 29 p. 6                                                                                                                                                                                                                                                                                                                                                       |
| 13.                                            | Non-participation                        | 0                                                                                                                                                                                                                                                                                                                                                             |
| Setting                                        |                                          |                                                                                                                                                                                                                                                                                                                                                               |
| 14.                                            | Setting of data collection               | Rural and medium sized city in Western Canada p. 7                                                                                                                                                                                                                                                                                                            |
| 15.                                            | Presence of non-participants             | No                                                                                                                                                                                                                                                                                                                                                            |
| 16.                                            | Description of sample                    | Healthcare professionals (e.g., physiotherapists, rehabilitation assistants, registered nurses; n=8); allied health providers experienced in providing community exercise programs (n=12); persons living with mild to moderate dementia or cognitive impairment (n=4); and care partners of persons living with dementia or cognitive impairment (n=5). p. 6 |
| Data collection                                |                                          |                                                                                                                                                                                                                                                                                                                                                               |
| 17.                                            | Interview guide                          | Interview guide was reviewed by diverse team of stakeholders including health care professionals, allied health providers, researchers, persons with dementia, and care partners of persons living with dementia. P. 7                                                                                                                                        |
| 18.                                            | Repeat interviews                        | No                                                                                                                                                                                                                                                                                                                                                            |
| 19.                                            | Audio/visual recording                   | Audio recording was done p. 7                                                                                                                                                                                                                                                                                                                                 |

|     |                      |                                            |
|-----|----------------------|--------------------------------------------|
| 20. | Field notes          | Field notes were taken p. 7                |
| 21. | Duration             | Interviews lasted between 1 - 2 hours p. 7 |
| 22. | Data saturation      | Yes                                        |
| 23. | Transcripts returned | No                                         |

| No                                     | Item                           | Author Response        |
|----------------------------------------|--------------------------------|------------------------|
| <b>Domain 3: analysis and findings</b> |                                |                        |
| Data analysis                          |                                |                        |
| 24.                                    | Number of data coders          | 3                      |
| 25.                                    | Description of the coding tree | No                     |
| 26.                                    | Derivation of themes           | Derived from data p. 9 |
| 27.                                    | Software                       | Excel, Word p. 9       |
| 28.                                    | Participant checking           | No                     |
| Reporting                              |                                |                        |
| 29.                                    | Quotations presented           | Yes p. 10-20           |
| 30.                                    | Data and findings consistent   | Yes p. 9-20            |
| 31.                                    | Clarity of major themes        | Yes p. 9-20            |
| 32.                                    | Clarity of minor themes        | Yes p. 9-20            |

# BMJ Open

## Factors influencing participation in physical activity for persons living with dementia in rural and northern communities in Canada: A qualitative study

|                                 |                                                                                                                                                                                                                                                                                                                                                                                                    |
|---------------------------------|----------------------------------------------------------------------------------------------------------------------------------------------------------------------------------------------------------------------------------------------------------------------------------------------------------------------------------------------------------------------------------------------------|
| Journal:                        | <i>BMJ Open</i>                                                                                                                                                                                                                                                                                                                                                                                    |
| Manuscript ID                   | bmjopen-2022-060860.R2                                                                                                                                                                                                                                                                                                                                                                             |
| Article Type:                   | Original research                                                                                                                                                                                                                                                                                                                                                                                  |
| Date Submitted by the Author:   | 06-May-2022                                                                                                                                                                                                                                                                                                                                                                                        |
| Complete List of Authors:       | Freeman, Shannon; University of Northern British Columbia, Nursing<br>Pelletier, Chelsea; University of Northern British Columbia<br>Ward, Kristin; University of Northern British Columbia<br>Bechard, Lauren; University of Waterloo<br>Regan, Kayla; University of Waterloo<br>somani, salima; University of Northern British Columbia<br>Middleton, Laura; University of Waterloo, Kinesiology |
| <b>Primary Subject Heading</b>: | Geriatric medicine                                                                                                                                                                                                                                                                                                                                                                                 |
| Secondary Subject Heading:      | Public health                                                                                                                                                                                                                                                                                                                                                                                      |
| Keywords:                       | Dementia < NEUROLOGY, GERIATRIC MEDICINE, HEALTH SERVICES ADMINISTRATION & MANAGEMENT, Quality in health care < HEALTH SERVICES ADMINISTRATION & MANAGEMENT, PUBLIC HEALTH, QUALITATIVE RESEARCH                                                                                                                                                                                                   |
|                                 |                                                                                                                                                                                                                                                                                                                                                                                                    |

SCHOLARONE™  
Manuscripts



I, the Submitting Author has the right to grant and does grant on behalf of all authors of the Work (as defined in the below author licence), an exclusive licence and/or a non-exclusive licence for contributions from authors who are: i) UK Crown employees; ii) where BMJ has agreed a CC-BY licence shall apply, and/or iii) in accordance with the terms applicable for US Federal Government officers or employees acting as part of their official duties; on a worldwide, perpetual, irrevocable, royalty-free basis to BMJ Publishing Group Ltd ("BMJ") its licensees and where the relevant Journal is co-owned by BMJ to the co-owners of the Journal, to publish the Work in this journal and any other BMJ products and to exploit all rights, as set out in our [licence](#).

The Submitting Author accepts and understands that any supply made under these terms is made by BMJ to the Submitting Author unless you are acting as an employee on behalf of your employer or a postgraduate student of an affiliated institution which is paying any applicable article publishing charge ("APC") for Open Access articles. Where the Submitting Author wishes to make the Work available on an Open Access basis (and intends to pay the relevant APC), the terms of reuse of such Open Access shall be governed by a Creative Commons licence – details of these licences and which [Creative Commons](#) licence will apply to this Work are set out in our licence referred to above.

Other than as permitted in any relevant BMJ Author's Self Archiving Policies, I confirm this Work has not been accepted for publication elsewhere, is not being considered for publication elsewhere and does not duplicate material already published. I confirm all authors consent to publication of this Work and authorise the granting of this licence.

1  
2  
3  
4 **Factors influencing participation in physical activity for persons living with dementia in**  
5 **rural and northern communities in Canada: A qualitative study**  
6  
7

8  
9 Freeman S, Pelletier C, Ward K, Bechard L, Regan, K, Somani S, and Middleton L.  
10

11  
12  
13 Corresponding Author:  
14

15  
16 Dr. Shannon Freeman  
17 Associate Professor, School of Nursing  
18 University of Northern British Columbia  
19 3333 University Way  
20 Prince George, British Columbia  
21 V2N 4Z9  
22 Canada  
23 e-mail: [shannon.freeman@unbc.ca](mailto:shannon.freeman@unbc.ca)  
24  
25  
26  
27  
28  
29  
30  
31  
32  
33  
34  
35  
36  
37  
38  
39  
40  
41  
42  
43  
44  
45  
46  
47  
48  
49  
50  
51  
52  
53  
54  
55  
56  
57  
58  
59  
60



## Abstract

**Objective:** In recognition that engagement in physical activities for persons living with dementia can be challenging in rural and northern communities, the objective of this study was to explore the factors influencing physical activity participation among persons living with dementia in rural/northern communities and to identify locally-driven mitigation strategies participants used to address barriers to physical activity.

**Setting:** Interviews and focus groups were conducted in two locations in northern British Columbia, Canada including a rural community (<10,000 persons) and a medium sized geographically isolated city (<80,000 persons). Both communities are located at substantial distances (>800km) from larger urban centres.

**Participants:** Twenty-nine individuals participated including healthcare providers(n=8), community exercise professionals(n=12), persons living with dementia(n=4), and care partners (n=5).

**Results:** Rural and northern contextual factors including aspects of the built and natural environment were the main drivers of physical activity for persons living with dementia. Limited capacity in the health system to support physical activity due to a lack of referrals, poor communication mechanisms, and limited resources for programming created challenges for physical activity participation. At the community level, local champions filled gaps in physical activity programming by leveraging informal networks to organize opportunities. Program level factors included a lack of consistency in staff, and challenges defining program scope given limited population size and the fear of stigma for persons living with dementia.

**Conclusions:** Environmental context and limited access to specialized programming affect the opportunities for persons living with dementia to engage in physical activities. Rural and

1  
2  
3 northern communities showed resiliency in providing physical activity opportunities yet  
4  
5 remained fragile due to human resource challenges. Without reliable resources and sustained  
6  
7 support from the health system, local champions remain vulnerable to burnout. Enhancing  
8  
9 support for local champions may provide greater stability and support to physical activity  
10  
11 promotion in rural and northern communities.  
12  
13  
14  
15

### 16 **Strengths and limitations of this study:**

- 17
- 18
- 19 • A study strength includes the engagement of diverse stakeholders (persons living with  
20 dementia, care partners, allied health providers experienced in providing community exercise  
21 programs, and healthcare professionals) contributing varying perspectives.
- 22 • A strength of employing a qualitative approach was our ability to describe in-depth the  
23 challenges participants faced at varying levels of the social-ecological model.
- 24
- 25 • A strength of the study is the inclusion of participants from two separate communities  
26 enabling a reflection on different needs and environments
- 27 • A limitation of this study is that relatively less participants living with dementia or mild  
28 cognitive impairment compared to other participant groups
- 29 • As this study was conducted prior to the COVID-19 pandemic, a limitation the impact of the  
30 pandemic restrictions and social distancing protocols on physical activity experiences of  
31 persons living with dementia is unknown.  
32  
33

34 **Keywords:** Physical activity, exercise, dementia, cognitive impairment, rural health,

35  
36 Alzheimer's disease, social ecological model  
37  
38  
39  
40  
41  
42  
43  
44  
45  
46  
47  
48  
49  
50  
51  
52  
53  
54  
55  
56  
57  
58  
59  
60

## INTRODUCTION

Dementia is an umbrella term used to describe progressive declines in cognition which may affect a person's behaviour and ability to perform activities of daily living. The most common form of dementia is Alzheimer's disease. More than 55 million persons are currently living with dementia worldwide.[1] Due to a rapidly aging population, it is projected that this number will rise to 78 million persons in 2030 and 139 million persons in 2050.[1] In Canada, 6.7% of persons aged over 65 are living with dementia [2]. As there is currently no cure for dementia, there is growing urgency to develop and implement strategies to support the well-being of persons living with dementia and their care partners.

There is much diversity and heterogeneity across rural communities in Canada based on sociospatial characteristics (e.g., population size, population density, distance from urban centre), social representation, population demographics, and resource availability. [3,4] Although there is no clear consensus on what constitutes a rural community,[5] common definitions are based on a combination of population size, distance from an urban centre, and access to services. In Canada, the provincial "north" is a term commonly used to identify the northern and more sparsely populated (e.g., rural, remote) areas which may also experience similarities in arctic/subarctic climates, political marginalization, economic dependency on natural resource development, and larger proportions of Indigenous populations.[6] Persons living in rural and northern communities face increased barriers to physical activity (e.g., transportation, snow/ice) and have fewer opportunities to engage in physical activity through specialized programming,[7] contributing to an increased risk of noncommunicable disease and disability compared to their urban counterparts. Characteristics specific to the rural context may directly and/or indirectly influence physical activity opportunities and capabilities among older adults.[8] As northern and

1  
2  
3 rural communities have a relatively greater proportion of older adults and a population that is  
4 aging faster than the general population,[9] the need to develop strategies to address context-  
5 specific barriers is urgent.  
6  
7  
8  
9

10 Physical activity is one of the best non-pharmacological strategies to support persons  
11 living with dementia to remain active and enhance quality of life.[10,11] For older adults living  
12 with dementia or mild cognitive impairment, which includes declines in memory, attention, and  
13 cognitive functioning that exceed that typically expected by age or educational level, physical  
14 activity can enhance and help maintain physical fitness, balance, mobility, functional ability, and  
15 cognition.[ 12,13,14,15] In addition to physical and cognitive benefits, physical activity has  
16 broader impacts including social inclusion and feelings of purpose, that contribute to overall  
17 well-being and quality of life.[16,17] Barriers that can prevent persons living with dementia from  
18 engaging in physical activity include stigma and lack of knowledge associated with  
19 dementia.[18]Persons living with dementia were found to spend more of their time engaged in  
20 sedentary behaviours when compared to age-matched cognitively healthy controls [19] and were  
21 less likely to meet physical activity guidelines[20] when compared to persons with no cognitive  
22 impairment.  
23  
24  
25  
26  
27  
28  
29  
30  
31  
32  
33  
34  
35  
36  
37  
38  
39

40 Despite the well-known benefits of physical activity, there remains a need to develop  
41 physical activity interventions for persons living with dementia that address at each level of a  
42 social-ecological model.[21] A social-ecological approach to physical activity considers the  
43 interacting factors that influence opportunities at the levels of policy, community, organizational  
44 (institutional), interpersonal, and individual.[22,23] For persons living with dementia, individual  
45 issues affecting memory, declines in cognitive abilities, and changes in mobility may impact  
46 physical activity behaviours differently across the course of the illness.[ 24,25,26] The barriers to  
47  
48  
49  
50  
51  
52  
53  
54  
55  
56  
57  
58  
59  
60

1  
2  
3 engagement in physical activity are amplified by the stigma surrounding diagnosis of dementia  
4 (e.g., interpersonal relationships) and lack of knowledge by exercise providers on how to  
5  
6 accommodate and adapt programming for varying and dynamic needs (e.g., lack of knowledge  
7  
8 and programming barriers).[16] Prior research exploring physical activity barriers and  
9  
10 opportunities for persons living with dementia has often focused on individual-level factors, with  
11  
12 limited attention to environmental and community-specific factors affecting the inclusion of  
13  
14 rural-dwelling persons living with dementia in physical activities.[23,26] A focus on  
15  
16 environmental and systems-level factors is particularly important for understanding behaviour in  
17  
18 rural and northern communities where the context shapes opportunities for active living. Taking  
19  
20 a systems approach to physical activity promotion, exercise providers and allied health care  
21  
22 providers who are aware of the unique needs of persons living dementia can be crucial enablers  
23  
24 of physical activity for older adults by fostering positive (or negative) experiences and  
25  
26 environments for physical activity. [17,27]  
27  
28  
29  
30  
31  
32

33 Care partners are uniquely positioned to raise awareness about factors influencing the  
34  
35 behaviours and choices of persons living with dementia. The sharing of this person-specific  
36  
37 knowledge with physical activity providers may inform intervention development and allow for  
38  
39 tailoring of the program by healthcare professionals and allied health providers to better meet the  
40  
41 individual needs of persons living with dementia. [26,27]  
42  
43  
44

45 Therefore, the objectives of this study were to: 1) explore the factors influencing physical  
46  
47 activity participation among persons living with dementia or mild cognitive impairment in rural  
48  
49 and northern communities in Canada, and 2) identify locally-driven solutions to salient barriers  
50  
51 to assist in the development of tools and resources for persons living with dementia, their care  
52  
53  
54  
55  
56  
57  
58  
59  
60

1  
2  
3 partners, allied health providers, and healthcare professionals in rural and northern communities  
4  
5 in Canada.  
6  
7  
8  
9

## 10 **METHODS**

11  
12 **Patient and Public Involvement:** This work was guided by a large stakeholder advisory team  
13 including persons with dementia, care partners, physical activity providers, researchers, and  
14 health care experts. This advisory team provided direction to the research team which was used  
15 to inform design and guide this work.  
16  
17  
18  
19

20  
21 **Study Context:** This study was nested within a larger national project aimed at developing  
22 resources and materials to support Dementia-Inclusive Choices for Exercise (DICE) project  
23 (www.dementiaexercise.com). [27,28] We report on the formative work conducted in northern  
24 British Columbia, Canada, highlighting the perspectives of those living in rural and northern  
25 geographies. Framed by a social ecological approach to understanding physical activity,  
26 opportunities for persons living with dementia are informed by interpersonal, intrapersonal,  
27 social and built environmental, and policy factors.[22] Thus, it is important to co-create  
28 knowledge with diverse communities based on population size and geographical location,  
29 aligning with basic principles of patient-oriented research.[29] Interviews and focus groups were  
30 conducted in two locations in northern British Columbia Canada; a rural community (population  
31 less than 10,000 persons) and a medium sized geographically isolated city (population less than  
32 80,000 persons). Both communities are considered rural based on distance from urban centre and  
33 access to health services.[30]  
34  
35  
36  
37  
38  
39  
40  
41  
42  
43  
44  
45  
46  
47  
48  
49  
50

51 **Participant Recruitment:** Purposive and snowball sampling strategies were employed to recruit  
52 exercise providers, allied health providers, persons living with dementia or mild cognitive  
53  
54  
55  
56  
57  
58  
59  
60

1  
2  
3 impairment, and care partners for persons living with dementia. Purposive non-probability  
4 sampling, commonly used in qualitative studies, allowed for the invitation of participants who  
5 were most representative or informative to participate.[31] Recruitment materials were initially  
6 shared in community locations (e.g., posters placed on notice boards at the Alzheimer Society  
7 and in a local memory clinic; notice placed in community newsletter) to recruit persons living  
8 with dementia and their family care partners. Local health systems stakeholders assisted in  
9 recruitment of healthcare professionals and exercise providers who delivered exercise programs  
10 for older adults and/or persons living with dementia (e.g., rehabilitation programs, geriatric  
11 outreach programs, community exercise programs).

12  
13  
14  
15  
16  
17  
18  
19  
20  
21  
22  
23  
24 Seven semi-structured focus groups and one interview were conducted with twenty-nine  
25 participants, including: healthcare professionals (e.g., physiotherapists, rehabilitation assistants,  
26 registered nurses; n=8); allied health providers experienced in providing community exercise  
27 programs (n=12); persons living with mild to moderate dementia or cognitive impairment (n=4);  
28 and care partners of persons living with dementia or cognitive impairment (n=5). Four focus  
29 groups involved both healthcare professionals and allied health providers, one focus group  
30 involved both care partners and a person living with dementia, one focus group involved only  
31 persons with dementia, and one focus group involved only care partners. The interview was  
32 conducted with a person living with dementia unable to participate in a focus group setting.  
33 Participant age and gender were not collected to protect participant confidentiality especially  
34 given the relatively small number of healthcare professionals and allied health providers in this  
35 region. Focus groups lasted approximately two hours for healthcare professionals and allied  
36 health providers and approximately one hour for care partners and/or persons living with  
37 dementia or cognitive impairment. Participants provided informed written consent/assent ahead  
38  
39  
40  
41  
42  
43  
44  
45  
46  
47  
48  
49  
50  
51  
52  
53  
54  
55  
56  
57  
58  
59  
60

1  
2  
3 of the session date and reconfirmed verbal consent/assent prior to the session commencing. All  
4  
5 participants living with dementia were deemed to have the capacity to provide consent which  
6  
7 was reconfirmed by their care partners. While there is no set number of participants or focus  
8  
9 groups as a rule in qualitative research, twenty nine participants was considered an acceptable  
10  
11 number of participants for this exploratory research as it fits within the commonly accepted  
12  
13 sample size ranging from 15-30 participants for qualitative research.[32] At the conceptual level,  
14  
15 concordance was observed in findings across differing participant groups and across both sites,  
16  
17 suggesting that saturation was achieved.[33] Harmonized ethics approval was received for this  
18  
19 study from the University of Northern British Columbia and University of British Columbia  
20  
21 (H18-00392).

22  
23  
24  
25  
26 **Focus Group Sessions:** Focus group sessions, tailored to the participant type, followed a semi-  
27  
28 structured guide based on previous iterations used by the research team.[28] The focus groups  
29  
30 were facilitated by an experienced moderator (SF) with support from a graduate student research  
31  
32 assistant (RF) who took notes and managed recording devices. The semi-structured approach  
33  
34 allowed probing into emerging issues and themes, where appropriate. Focus groups enabled  
35  
36 exploration of interactive social contexts and provided insight on participant perspectives and  
37  
38 attitudes.[34,35] Group processes helped participants identify and clarify their perspectives with  
39  
40 each other and encouraged increased depth of description and discussion among participants,  
41  
42 providing more detailed responses to prompts.[36] Two of the focus group scripts used are  
43  
44 available in supplemental file 1 (for persons with dementia) and supplemental file 2 (for allied  
45  
46 healthcare providers).

47  
48  
49  
50  
51 **Data Analysis:** An inductive thematic analysis of transcripts was used guided by Braun and  
52  
53 Clarke's six steps. [37,38] Beginning with familiarization of the data, a multi-disciplinary team  
54  
55  
56  
57  
58  
59  
60



1  
2  
3 of researchers experienced in qualitative analyses (SF [gerontology] and CP [exercise  
4 physiology]) along with a research trainee (KW [health sciences]) read and reread the transcripts,  
5  
6 writing initial thoughts from the data (step 1). All three researchers (SF, CP, and KW) are  
7  
8 women who live in northern British Columbia. Each have their own lived experience interacting  
9  
10 with and supporting persons living with dementia and care partners as well as experience  
11  
12 interacting with community service providers. The engagement of team members from diverse  
13  
14 backgrounds enable robust discussion and consideration of patterns in the data and understanding  
15  
16 from various viewpoints (e.g., from the perspectives of supporting healthy aging, to optimizing  
17  
18 physical activity and exercise opportunities). To capture broad perspectives on the data,  
19  
20 researchers independently identified and coded the transcripts (step 2) and developed initial  
21  
22 themes by identifying patterns in the data set (step 3). Initial themes were then discussed as a  
23  
24 group to develop rich descriptions and definitions using a white board to map connections  
25  
26 between ideas (step 4). Final themes were established and defined, with sub-themes generated as  
27  
28 appropriate within each overall theme (step 5). Data extracts (quotes), identified to best describe  
29  
30 each theme/subtheme, are presented with a narrative summary (step 6).  
31  
32  
33  
34  
35  
36  
37

38 Using the social ecological model as a guide, [22,39] themes were deductively mapped using  
39  
40 a white board and post-it notes and plotted according to user, program, health system, and  
41  
42 broader community (contextual) levels to describe the factors influencing physical activity for  
43  
44 persons living with dementia. Locally driven mitigation strategies and solutions described by  
45  
46 participants to overcome barriers to physical activity were identified across each of the four  
47  
48 levels. Analysis was conducted using Microsoft Word and Excel software.  
49  
50  
51  
52  
53  
54  
55  
56  
57  
58  
59  
60

## RESULTS

Factors influencing participation in physical activity for persons living with dementia were organized into four themes according to the social ecological model: Northern and rural context, health system, physical activity programming, and program participant level (Figure 1). Identified challenges and mitigations strategies were also mapped to the social ecological model (Table 1).

### **Northern and rural context: Unique features of the northern and rural context in Canada**

**both promote and limit physical activity** The Canadian northern and rural environmental context underpinned all aspects concerning health and physical activity for persons living with dementia. The local and regional context shaped program opportunities, availability, accessibility, and preferences.

*Natural environment.* Elements including weather (e.g., harsh winter conditions and wildfires), geographic location (e.g., isolation from urban centres and from physical activity opportunities), wildlife (e.g., presence of bears, cougars, and moose), and lack of daylight in the winter months influenced willingness and abilities of persons living with dementia to engage in physical activity. One care partner noted: “By 7 o'clock it's really dark, and I don't really feel that safe going in the dark by myself ... the temperature in the winter might be okay, but it might a sheet of ice”. Participants reported the need to adapt to changes in weather to maintain daily physical activities including outdoor walking.

*I have to wear the tall boots. So, I get my boots on, that means they go right up to the knee and so you can stomp into the snow. Sometimes you put cleats on them so you don't slip. And I always have my poles. It's very important to have the poles. It's beautiful, you know. (Person living with dementia)*

Long-time residents of Canadian rural and northern communities described the easy access to natural environments including rivers, lakes, and forest trails as a facilitator of outdoor

1  
2  
3 physical activity engagement for all persons including those living with dementia. As one  
4  
5 participant explained:

6  
7  
8 *I used to do exercise that was more like go lift weights and workout and now it's like,*  
9 *no, unless it's fun. I like dancing. I like walking the dog in the forest or somewhere off-*  
10 *leash where I can just wander around in the trees and the mushrooms. It's hard to get*  
11 *me to go fast. I don't go fast, but you can get me to go up a hill (Person living with*  
12 *dementia)*

13  
14  
15 Further, one care partner of a person living with dementia emphasized how immersing  
16  
17 themselves in the natural environment contributed not only to their ability to be physically  
18  
19 active but also related to how they conceptualize and find positive meaning in activity as a  
20  
21 way to be outside and seek goals beyond fitness.  
22

23  
24  
25 *I like the freedom of being away from it all in the woods, on the water—that's really*  
26 *important. In the backyard, no phones. And you just respond as you go and you're*  
27 *thinking of something you want to do, you do it. That's freedom. That's exercise.*  
28 *That's a good feeling. (Care partner of person living with dementia)*  
29

30  
31  
32 *Built environment* Although a lack of facilities and vast geographic distance to the nearest  
33  
34 urban centre were mentioned as barriers, participants described some of the unique built  
35  
36 environmental features that facilitated physical activity. Participants valued the accessible  
37  
38 infrastructure in their community: *"We actually have this incredible sidewalk system here ...*  
39 *[it's] designed so that every street has access to this sidewalk system that is maintained by the*  
40 *municipality to get to downtown, to do grocery shopping, and so on"* (Person living with  
41  
42 dementia). Further, participants shared how city planners in their rural community had  
43  
44 considered the needs of an aging population when designing the sidewalk (e.g., cloverleaf and  
45  
46 crescent patterns) to purposefully support safe and accessible physical activity for persons  
47  
48 with cognitive impairments.  
49  
50  
51  
52  
53  
54  
55  
56  
57  
58  
59  
60

### **Health System: Limitations of the health system lead to development of local solutions**

The overarching structure of the health care system impacted access to physical activity opportunities through three main facets: the referral process and policies, communication processes, and resource availability. Each subsequently impacted physical activity opportunities for program end-users.

*Lack of capacity and mechanisms for referrals:* Healthcare professionals and allied health providers struggled with the process of referring persons with dementia to specialized physical activity programs due to lack of capacity and resources throughout the system (e.g., staffing, limited program offerings) and absence of clear mechanisms in place to facilitate the referral process. When responsibility and accountability for referrals was unclear, it led to inaccuracies and gaps in assessment documentation which subsequently resulted in delayed or failed referrals. In some cases, when exercise providers received inaccurate and incomplete documentation during the referral process, it resulted in duplication of health assessments and additional workload. One healthcare professional noted:

*What's on the piece of paper doesn't quite identify what the person's needs are. So, a lot of extra digging needs to go into that. So, whether the person needs to see a geriatrician which is more sort of the medical component, it's triaged that way.*  
(Healthcare Professional)

For persons with dementia and their care partners, the lack of a clear referral process or advice from their healthcare provider led to confusion and lack of awareness about where to seek trusted information about safe physical activity opportunities. One participant described their frustration noting:

*It's been an ongoing question, where can we get more information. "Read about it." Okay, we've read about it. Who can we talk to? "Alzheimer's group" or a contact or "your GP, he can help". We've been through all that and there isn't any.* (Care partner of person living with dementia)

Difficulty in communication and fragmented access to information leads to lack of knowledge:

Challenges with clear and consistent communication were recognized as a barrier across all participant groups. One participant described these communication challenges noting:

*Word finding difficulties depending on the type of dementia can be a challenge for the person who's struggling to communicate, and for other participants as well. Maybe the person with dementia who also has word finding difficulties they're not intentionally being dishonest, but their stories change depending on the wording that they're using because they can't find their words and then other participants are concerned for them because they just heard a story that's not necessarily true, but the person with dementia couldn't find the words to accurately tell what was going on. So, some communication barriers. (Allied health provider)*

Participants expressed a desire for access to resources and information specific to dementia, the disease process, and how to support physical activity opportunities that were safe and inclusive.

Persons living with dementia and care partners described the existing resources as inconsistent, inaccessible, or otherwise unavailable. One participant shared: *"My mother had Alzheimer's, my grandmother had Alzheimer's as well, and I've never come across any information that walks you through what to expect. That would be very helpful"* (Care partner of person living with dementia). While recognizing healthcare professionals as a key communication mechanism for information and educational resources about physical activity, one care partner shared:

*The professionals don't have the time for this [sharing information related to dementia], unless you have an appointment. Like if you're on a list, it could be 3 months, could be 6 months, it could be a year, or could be really soon. (Care partner of person living with dementia)*

In response, care partners connected informally to each other to promote knowledge sharing by leveraging community networks and using existing communication channels within the community. Close community connections, many based on decades of living in the same community, enabled persons living with dementia and their care partners to communicate their

1  
2  
3 needs directly to healthcare professionals and allied health providers through informal  
4 relationships. Within smaller and geographically isolated communities, participants described a  
5 lack of anonymity, noting it was common to run into each other at the grocery store, public  
6 events, or in their neighbourhood, allowing for informal connection and information exchange.  
7  
8 Participants shared print copies of resources regarding physical activity and communicated by  
9 telephone to help compensate for the lack of accessibility to information formally from  
10 healthcare professionals and exercise providers.  
11  
12  
13  
14  
15  
16  
17  
18  
19  
20  
21

22 Limited resources lead to ongoing need for flexibility, creativity, and advocacy: Participants  
23 emphasized the complexity of securing necessary resources to support high quality and  
24 sustainable exercise programming.  
25  
26  
27

28 *Maybe we touched on this when we talked about barriers and the priorities for the health*  
29 *care team at this team, education and community integration doesn't often come up as a*  
30 *high priority. It's very task-oriented health care. Like, this happened, give them this*  
31 *treatment, they're done. But helping with educating on, these are the things that are*  
32 *available in the community for you to participate in because this is going to be an*  
33 *ongoing—aging is not going to stop when you leave this hospital. Having more process-*  
34 *oriented approach and more education and more community integration, but*  
35 *unfortunately, due to resources that isn't always a priority. (Allied Health Provider)*  
36  
37  
38

39 Participants described the importance of flexibility and creativity to overcome the inability of the  
40 health systems to provide physical activity opportunities, often due to limited funding, lack of  
41 infrastructure, and substantial gaps in human resources. In particular, participants shared their  
42 frustrations surrounding the limited specialized dementia care and services due to the limited  
43 human resources. This is especially prevalent within small and heterogeneous populations, as  
44 one participant noted:  
45  
46  
47  
48  
49  
50  
51

52 *there's just one or two staff for a different, very broad population sometimes because*  
53 *they don't have the same levels of functioning, but we only have ... just the bare*  
54  
55  
56  
57  
58  
59  
60

1  
2  
3 *amount of staff, right. Maybe that's also a challenge. We don't have enough people*  
4 *(Allied Health Provider)*  
5

6 Inadequate human resources can also lead to lack of specialist knowledge regarding exercise and  
7 dementia, contributing to unmet goals and objectives of both the program providers as well as  
8 participants. The shortage and/or absence of trained care providers caused changes in program  
9 design commonly by adjusting from physical to psychosocial goals. The flexibility to adjust the  
10 focus of the program allowed activities to remain operational. One exercise provider described  
11 that when healthcare professionals were unable to provide formal rehabilitation programs or  
12 exercise providers were unavailable to provide structured activities in their community, they  
13 pivoted to offer a social program instead. However, in doing so, they were also aware of the need  
14 to provide supports that fell within their own scope of practice.  
15  
16  
17  
18  
19  
20  
21  
22  
23  
24  
25  
26

27 *We have to be really mindful in terms of each other's scopes, so we can't do exercise-*  
28 *whatever's called technically "exercise classes." However, we can do things that are fun*  
29 *and fitness, which would be like kick ball and badminton (Allied Health Provider)*  
30  
31

32 To mitigate the lack of trained formal healthcare professionals and exercise providers,  
33 community champions built capacity by engaging volunteers and student trainees. One  
34 participant emphasized that:  
35  
36  
37

38  
39 *Most of the groups ... we use the students for. And it was a student actually that made*  
40 *the falls group. He did all the prep for it, everything. Got it all in line and all the stuff*  
41 *out to the doctors. We just kept it. The same with the fit group; we just kept it. And*  
42 *they love it" ... "And it works well, too (Healthcare Professional)*  
43  
44

45 Participants described making use of public spaces such as local recreation centres to organize  
46 informal activity opportunities and participate in group programs in lieu of formal exercise  
47 facilities (e.g., fitness club, community recreation center), which may or may not be available.  
48  
49 In one community, participants shared their use of a public multipurpose area for physical  
50 activity.  
51  
52  
53  
54  
55  
56  
57  
58  
59  
60

1  
2  
3 *One of three recreation facilities ... [includes] a multi-purpose facility. There's tennis*  
4 *courts outside. There's community rooms where events could be held, meetings could be*  
5 *held. There's a gymnasium there. They do program sports, so you could go play at*  
6 *badminton" (Care partner of person living with dementia)*  
7  
8  
9  
10

## 11 **Physical activity programing: Flexibility is needed to adapt to diverse community needs**

12 **and preferences, as well as expertise available** Healthcare professionals and allied health  
13  
14 providers described the value of working towards defining physical activity programs including a  
15  
16 clear set of characteristics, naming, and the need for trained program staff. Addressing each  
17  
18 aspect is key to creating and sustaining a successful exercise program. However, challenges  
19  
20 experienced in northern and rural communities in Canada are described below.  
21  
22  
23  
24  
25  
26

27 Defining physical activity programs is needed but can affect accessibility for persons living with  
28 dementia: Participants discussed challenges when determining whether to define and clearly  
29  
30 label a physical activity program as focused and inclusive of persons living with dementia or to  
31  
32 keep the focus more generic. Use of a clear definition acknowledging a specific focus of the  
33  
34 program designed for persons living with dementia was thought to improve clarity in participant  
35  
36 eligibility and feelings of inclusion, it was also expressed that this may limit the willingness of  
37  
38 some persons living with dementia to attend due to the stigma associated with dementia and  
39  
40 cognitive impairment. This sentiment was expressed in relation to those living in small rural  
41  
42 Canadian settings, where some people who wished to keep their diagnosis of dementia  
43  
44 confidential were potentially risking their privacy if they attended a physical activity program  
45  
46 designed and labelled for persons living with dementia. The stigma associated with dementia was  
47  
48 mitigated in small communities by offering the programs at neutral locations within the  
49  
50 community, changing the language to enhance inclusion, and normalizing the environment. One  
51  
52  
53  
54  
55  
56  
57  
58  
59  
60



1  
2  
3 care partner commented that the stigma associated with dementia was still evident in their  
4  
5 community and impacted their choices in physical activity: *“And there’s a stigma attached to it*  
6  
7 *in our minds. Not necessarily that anymore, but there has been in our past lives -- a person not*  
8  
9 *right, something wrong upstairs, here in the cortex.”* (Care partner of person living with  
10  
11 dementia). One health care professional also noted *“If there’s an Alzheimer’s Group, but*  
12  
13 *somebody doesn’t like to acknowledge that they have Alzheimer’s then you might not want*  
14  
15 *to suggest that they go to an Alzheimer’s group...so that could actually be a barrier”* (Health  
16  
17 care professional).  
18  
19

20  
21 Participants also expressed that labelling a program as ‘exercise’ can be interpreted in  
22  
23 different ways. For some, ‘exercise’ may be viewed as an opportunity to enhance and maintain  
24  
25 health, while for others, exercise can be intimidating and exclusive. One exercise professional  
26  
27 described this issue:  
28  
29

30  
31 *I have to re-approach all the time. If I approach someone and say, “Do you want to*  
32  
33 *come exercise?” They’ll scoff at the thought of exercise. “I’m 94. I’m not going to*  
34  
35 *exercise, today.” But then if I say, “Hey, want to come play a game with me.” Then*  
36  
37 *they’re all for it* (Allied Health Provider)

38  
39 At the same time, the lack of a clear definition for exercise was not always perceived as  
40  
41 detrimental as it can allow for fluidity in roles. For rural communities in Canada with limited  
42  
43 capacity, flexibility in job roles and volunteer engagement allowed programs to continue to run.  
44  
45 For example, one participant described how labelling a program as a social activity allowed it to  
46  
47 be offered by a variety of providers:

48  
49 *We’re not physio. We do fun and fitness. Like [when] physio is unable to come one*  
50  
51 *morning because they’re doing other things or when they’re short staffed, then we do fun*  
52  
53 *and fitness, so we do a game, like bowling”* (Allied Health Provider)

54  
55 Balancing program design to meet everyone’s needs and expectations: No singular physical  
56  
57 activity program or method of delivery emerged as a one size fits all answer to ensure inclusivity  
58  
59

1  
2  
3 for all persons living with dementia, at all times, and in all locations. Instead, participants shared  
4 the importance of intentional decisions around program design and details including scheduling,  
5 program location, participant eligibility, and method of program delivery (e.g., standing, sitting,  
6 or mixed classes) to meet the needs of those within their area. These decisions can be difficult  
7 when serving a small but diverse group, as in rural communities in Canada, when balancing  
8 finite human and financial resources. If a program is too general, it may risk not being effective  
9 for anyone attending as noted by one exercise provider:

10  
11  
12  
13  
14  
15  
16  
17  
18  
19 *The problem is that ... I don't think that anybody's really getting enough individual*  
20 *program in order to actually make an impact ... Even with the stretching, they're not*  
21 *necessarily getting positioned in the exact right place, but it's one instructor and 20, 25*  
22 *people. So I think programming where you have a ratio ... depending on what the abilities*  
23 *of those four people are, or three people, the helper could be helping the one that's*  
24 *needing more assistance and that could travel (Allied Health Provider)*  
25  
26

27 Additionally, participants discussed the challenge of balancing routine and structure within the  
28 programs, keeping the program flexible enough to keep those participating engaged and meet  
29 their expectations while maintaining enough structure to achieve physical fitness goals.

30 Flexibility in program provision, program design and provider roles was identified as a  
31 mitigation strategy which enabled providers to be responsive to the needs and preferences of  
32 persons living with dementia, scheduling, and practitioner scope of practice.  
33

34  
35  
36  
37  
38  
39  
40  
41  
42 **Program participant level: Supportive providers with flexibility are needed to help persons**  
43 **with dementia overcome challenges and fears.** Participants shared unique experiences with  
44 physical activity based on the interaction between the rural environmental setting, the person  
45 living with dementia and their care partner where applicable.  
46  
47  
48

49  
50  
51 Motivation and knowledge about physical activity: Participation in physical activity requires a  
52 conscious investment of time and personal resources. Persons living with dementia and care  
53  
54  
55  
56  
57  
58  
59  
60

1  
2  
3 partners described difficulties balancing multiple demands and had difficulty prioritizing  
4  
5 physical activity due to other scheduled health related appointments or commitments. When  
6  
7 asked about what gets in the way of physical activity, one participant living with dementia  
8  
9 explained there were often “*Other activities that weren’t scheduled, or you’re already committed*  
10  
11 *to.*” Participants living with dementia noted the importance of a positive attitude and personal  
12  
13 motivation toward physical activity participation as a critical enabler, for example:  
14  
15

16  
17 *I would enjoy more exercise. They have to change it up so it’s not always the same*  
18 *because you do get bored. I don’t care who you are, you get bored, so if you change*  
19 *the program a little bit every once in a while, then you’re more likely to keep attending*  
20 *(Person living with dementia)*  
21

22  
23 Participants living with dementia further expressed how challenging it was to find trustworthy  
24  
25 information about physical activity, impacting their ability to engage in regular activity:  
26

27  
28 *You know, the world’s a big place and I think the internet has a lot of good*  
29 *information. I don’t know how to access that, but I know the girls do, and I think it*  
30 *gives you a wide variety of information and choices. I don’t know what other source. I*  
31 *mean, I’m sure there are other sources. I haven’t a doubt that’s the only one (Person*  
32 *living with dementia)*  
33

34  
35 Similarly, participants identified that having instructors who are knowledgeable about exercise  
36  
37 and familiar with supporting persons living with dementia to be active, would be an important  
38  
39 facilitator supporting their participation in physical activity.  
40

41  
42 *I would like to actually see whether or not they’ve got trainers there that could show me. I’m*  
43 *not comfortable going into a weight room thinking, “Oh, what I should be doing with*  
44 *this?.....That would be good if there were people there that would teach you how to use*  
45 *weights (Person living with dementia)*  
46

47 *Fear can prevent participation:* For persons living with dementia, a variety of fears were  
48  
49 reported which prevented engagement in physical activity programming. These fears included:  
50  
51 the fear of being institutionalized if the program was held within a long-term care facility, the  
52  
53 fear of getting lost when needing to take public transportation to attend an exercise class, and the  
54  
55  
56  
57  
58  
59  
60

1  
2  
3 fear of injury from falling. Care partners further expressed negative feelings towards physical  
4  
5 activity participation due to anticipation of the progressive loss of control and declining physical  
6  
7 abilities of the person living with dementia as their disease progressed. For one care partner, they  
8  
9 described how the fear not only led to distress, but that it was also an indicator for them of  
10  
11 disease progression.  
12  
13

14  
15 *Mom doesn't do a lot of exercise. She gets lost very quickly, now, and forgets where she*  
16 *is or where she's going. She's really nervous of falling. She's terrified of snow. Like if*  
17 *there's snow or ice, she doesn't want to walk in it or she gets really stressed. Like she'll*  
18 *panic because there's snow or ice. She's really nervous of falling down. That's her*  
19 *biggest thing that she's going to fall down. And with my mom, if she falls down, she*  
20 *doesn't get, from a crawl to a stand is sometimes impossible. My mom would stand up*  
21 *and it's really hard for her to stand up. And that's something, that for me has been an*  
22 *indicator with both my parents when they couldn't get up from getting down, whether it's*  
23 *in the bathtub or when it's something's on the floor and they go down to get it and then*  
24 *they're stuck and they can't figure out how to get up and it's—and then fear comes*  
25 *because they realize they can't get up, but they're like, "But I'm supposed to be able to*  
26 *get up and I can't get up." And so, I don't know how to explain it, except that it's*  
27 *terrifying for them, and it's heartbreaking to witness, but it's also heartbreaking for each*  
28 *of them. (Care partner of person with dementia)*  
29  
30

31  
32 In recognition that these fears are common for persons living with dementia, healthcare  
33  
34 professionals and allied health providers noted the importance for fall prevention training for  
35  
36 those individuals.  
37  
38

39 *Building up the confidence [of persons living with dementia] in terms of getting up from*  
40 *a fall I think is important because fear of falling is a barrier to a lot of community*  
41 *participation, recreation and leisure participation in particular is what I'm referring to,*  
42 *but yeah, fear of falling is a big barrier for getting out and then people are at risk for*  
43 *social isolation. (Allied Health Provider)*  
44  
45

## 46 47 **DISCUSSION**

48  
49 This study explored factors influencing physical activity participation for persons living  
50  
51 with dementia in northern and rural communities in Canada and the strategies implemented in  
52  
53 these settings to mitigate barriers to physical activity participation. From the perspectives of  
54  
55

1  
2  
3 healthcare professionals, allied health providers, persons living with mild to moderate dementia,  
4 and care partners, key points that emerged were the lack of health system support for physical  
5 activity participation, and substantial gaps in tailored exercise program offerings and knowledge  
6 needed to provide accessible, inclusive opportunities for physical activity. Often in rural and  
7 northern communities these challenges are compounded and interlinked (e.g., accessibility to use  
8 a neutral location to offer a program may not be available in the winter months or may  
9 experience scheduling challenges in the winter months due to competing demands for limited  
10 indoor space; reliability of public transportation may differ between winter and summer  
11 schedules or safety in walking outdoors may be affected by hours of sunlight by season or  
12 whether wildlife such as bears are active or hibernating).

13  
14  
15  
16  
17  
18  
19  
20  
21  
22  
23  
24  
25  
26 In response to the substantial gaps experienced at the systems level, community-driven  
27 initiatives emerged. Community-based solutions, developed in response to gaps in available  
28 services and supports, relied on a limited number of community champions to provide physical  
29 activity programming. These community-specific initiatives were organically tailored to address  
30 the needs of the community of focus with consideration of the unique environmental context and  
31 finite human and financial resources. Fear of injury and stigma associated with a dementia  
32 diagnosis demand a multi-program response with flexibility, inclusivity and knowledge, not only  
33 for persons living with dementia but also for care partners who support persons living with  
34 dementia to engage in physical activity.

35  
36  
37  
38  
39  
40  
41  
42  
43  
44  
45  
46  
47 The individual-level factors influencing physical activity for persons living with  
48 dementia, including fear, stigma, cognitive function, and lack of knowledge, are commonly  
49 reported in the literature.[26] While these are still true for people living in northern and rural  
50 communities in Canada, fear and stigma are heightened due to the smaller population size and  
51  
52  
53  
54  
55  
56  
57  
58  
59  
60

1  
2  
3 lack of dementia-related knowledge due to limited access to trained providers or appropriate  
4 facilities. With limited populations in rural communities, it can become increasingly difficult for  
5 person living with dementia and their care partners to protect their privacy as it is not possible to  
6 remain anonymous when attending community programming.[40] In some cases, especially  
7 when individuals perceive their actions may be observed and discussed by others in their rural  
8 communities, they may prefer to engage in group activities in a neighbouring community,  
9 however, this may involve substantial investment of resources for those in rural and northern  
10 communities, including travel time and costs.[40] Commonly in rural communities, while  
11 individual-level barriers persist, environmental and community-level factors create an additional  
12 barrier that must be overcome to engage in physical activity, which is particularly true for  
13 persons living with dementia.[41]

14  
15 Context is essential to understand the factors influencing physical activity participation  
16 for persons living with dementia in northern and rural communities in Canada. In alignment with  
17 our previous work, the natural environment can both enhance physical activity participation and  
18 exercise (e.g., proximity to outdoor recreation) and, at times, limit physical activity (e.g., winter  
19 weather, ice).[7] While the availability of facilities and accessible locations suitable for exercise  
20 provision and access to specialized exercise providers is a facilitator of physical activity for  
21 persons living with dementia in urban areas,[27] our findings highlight the near complete  
22 absence of such facilities and providers in northern and rural communities in British Columbia.  
23 This reinforces the importance to consider the links between the availability of infrastructure,  
24 networks, and resources with the degree of urbanization in the community.[42] While it is  
25 common for exercise providers to have limited knowledge of dementia and training regarding  
26 inclusive practices in physical activities,[28] this is amplified in rural communities by the  
27  
28  
29  
30  
31  
32  
33  
34  
35  
36  
37  
38  
39  
40  
41  
42  
43  
44  
45  
46  
47  
48  
49  
50  
51  
52  
53  
54  
55  
56  
57  
58  
59  
60

1  
2  
3 continued reliance on exercise providers without formal training (e.g., rehabilitation or recreation  
4 providers) working ‘off the side of their desk’ to meet community needs. The lack of trained and  
5  
6 specialized staff leads to inconsistent program content and availability, fragmentation of program  
7  
8 accessibility across different communities, and limited capacity for formal assessment. The lack  
9  
10 of health systems leadership, authority, regulation, and quality control specific to physical  
11  
12 activity programming have left individuals living in northern and rural communities in British  
13  
14 Columbia to take a community-driven, grass-roots approach to support inclusion of persons  
15  
16 living with dementia in physical activity and an overreliance on non-profit community  
17  
18 organizations. In response to the lack of leadership from the health system to support northern  
19  
20 and rural communities in British Columbia, individual community champions have emerged,  
21  
22 focussed on building and enhancing community-level programs to address existing deficits.  
23  
24 When access to the program relies on knowledge and awareness of community champions and  
25  
26 informal networks, persons living with dementia and care partners who are not well connected  
27  
28 and already engaged in the community may be unable to access physical activity programming.  
29  
30 The issues identified in this study, which are present at the individual, community, and system  
31  
32 levels of the social-ecological model, echo the priorities and Canadian call to action described  
33  
34 by Njki foruk (2018) to “support equitable action on rural and remote physical activity promotion  
35  
36 across Canada”.<sup>[43]</sup> Further these findings warrant a collaborative response between  
37  
38 communities and health systems to enhance equity in the ability of persons living with dementia  
39  
40 to access physical activity supports, especially in Canadian northern and rural communities.  
41  
42  
43  
44  
45  
46  
47  
48

49 This study provides insight into the factors affecting physical activity participation for  
50  
51 persons living with dementia involving participants across two rural and northern communities in  
52  
53 British Columbia Canada. The engagement of diverse stakeholders in this geographic region  
54  
55  
56  
57  
58  
59  
60

1  
2  
3 using a qualitative approach allowed us to capture diverse perspectives on the existing deficits  
4 and has helped to identify gaps in tailored exercise program offerings and knowledge necessary  
5 to provide accessible, inclusive opportunities for physical activity. While a qualitative approach  
6 was deemed the most appropriate method to answer our research questions, further research may  
7 consider employing a quantitative research approach to gather both objective and subjective  
8 perspectives of participants and to increase the sample size. As the geographical focus of this  
9 work was limited to two northern and rural communities in Canada, findings may not be  
10 transferable to other communities such as urban centres or other countries with differing health  
11 care systems and resources. More research is needed to understand whether other northern and  
12 rural communities in Canada rely heavily on local community-specific initiatives. Further, a  
13 limitation of this study is the limited number of participants living with dementia or mild  
14 cognitive impairment who participated in this study (n=4/29). While allied health providers and  
15 healthcare professionals who participated in the study provided valuable reflections on the  
16 challenges they have observed, they are limited in their ability to comment specifically on  
17 individual-level factors and the lived experiences of persons living with dementia and their care.  
18  
19  
20  
21  
22  
23  
24  
25  
26  
27  
28  
29  
30  
31  
32  
33  
34  
35  
36

37 In Canada, unintended consequences of pandemic restrictions (e.g., physical distancing  
38 protocols) include reductions of physical activity.[44, 45] Disruptions in daily routines and  
39 limited engagement in physical activity during the COVID-19 pandemic have been reported to  
40 severely impacted persons living with dementia.[46] Emerging evidence suggests that  
41 interdisciplinary prevention approaches to address physical inactivity related to pandemic  
42 restrictions and isolation are urgently needed especially for persons living with dementia.[47] As  
43 our work was conducted prior to the COVID-19 pandemic, future research is needed to examine  
44 how pandemic restrictions and social distancing protocols were experienced in rural and northern  
45  
46  
47  
48  
49  
50  
51  
52  
53  
54  
55  
56  
57  
58  
59  
60



1  
2  
3 communities in Canada and subsequently how COVID-19 pandemic may have impacted the  
4  
5 ability of persons with dementia to engage in physical activity and have impacted the provision  
6  
7 of local community-driven initiatives.  
8  
9

## 10 **CONCLUSIONS**

11  
12 Physical activity opportunities and experiences for persons living with dementia living in  
13  
14 northern and rural communities in Canada are shaped by the environmental context and limited  
15  
16 accessibility to specialized programming. Local champions risk burnout by working to fill gaps  
17  
18 left by absent health and non-profit sectors in small communities, limiting the long-term capacity  
19  
20 and support in northern and rural communities for growing number of persons aging with  
21  
22 dementia in Canada. It is important to support existing community leaders in a way that respects  
23  
24 local knowledge and expertise.  
25  
26  
27  
28  
29  
30  
31  
32  
33  
34  
35  
36  
37  
38  
39  
40  
41  
42  
43  
44  
45  
46  
47  
48  
49  
50  
51  
52  
53  
54  
55  
56  
57  
58  
59  
60

1  
2  
3 **Figure 1 Legend:** Key findings by theme organized according to the social ecological model  
4  
5  
6  
7  
8  
9  
10  
11  
12  
13  
14  
15  
16  
17  
18  
19  
20  
21  
22  
23  
24  
25  
26  
27  
28  
29  
30  
31  
32  
33  
34  
35  
36  
37  
38  
39  
40  
41  
42  
43  
44  
45  
46  
47  
48  
49  
50  
51  
52  
53  
54  
55  
56  
57  
58  
59  
60

For peer review only

1  
2  
3 **Contributorship Statement:** All authors were actively engaged in this project in accordance  
4 with the ICMJE guidelines for authorship. Freeman and Middleton were involved in all aspects  
5 of this research. Pelletier was involved in all aspects of the manuscript development including  
6 data analysis, writing, and editing. Bechard was involved in planning the project, data collection,  
7 and editing of the manuscript. Regan was involved in planning the project and editing of the  
8 manuscript. Ward was involved in data analysis, drafting, and editing the manuscript. Somani  
9 was involved in drafting and editing the manuscript.  
10  
11  
12  
13  
14  
15  
16  
17  
18  
19  
20

21 **Competing interests:** No competing interest.  
22  
23  
24  
25

26 **Funding:** This study was supported by grants received from the Alzheimer's Society Research  
27 Program and from the Canadian Institute for Health Research award number PEH 157075.  
28  
29  
30  
31  
32

33 **Data sharing Statement:** No additional data available.  
34  
35  
36  
37

38 **Patient and Public Involvement:** Our work is guided by a large stakeholder advisory team  
39 including persons with dementia, care partners, physical activity providers, researchers, and  
40 health care experts. We wish to acknowledge and thank all study participants, members of the  
41 DICE team, and Rebecca Ferris (RF) for her support.  
42  
43  
44  
45  
46  
47  
48  
49  
50  
51  
52  
53  
54  
55  
56  
57  
58  
59  
60

## References

- [1] World Health Organization. Dementia fact sheet. World Health Organization 2021. <https://www.who.int/news-room/fact-sheets/detail/dementia>(accessed Sep 2021).
- [2] [Public Health Agency of Canada](https://www.canada.ca/en/public-health/services/publications/diseases-conditions/dementia-strategy-annual-report-parliament-2021.html). (2022). A dementia strategy for Canada: Together we achieve -2021 annual report. <https://www.canada.ca/en/public-health/services/publications/diseases-conditions/dementia-strategy-annual-report-parliament-2021.html> (accessed May 2022).
- [3] Laurin, F., Pronovost, S., & Carrier, M. (2020). The end of the urban-rural dichotomy? Towards a new regional typology for SME performance. *J Rural Stud*, 80, 53-75.
- [4] Keating, N., & Phillips, J. (2008). A critical human ecology perspective on rural ageing. *Rural ageing: A good place to grow old*, 1-10.
- [5] MacGregor-Fors I, Vázquez LB. Revisiting ‘rural’. *Sci Total Environ* 2020;741:132789. doi:10.1016/j.scitotenv.2019.06.135.
- [6] Coates K, Poelzer G. The next northern challenge: the reality of the provincial north. Macdonald-Laurier Institute publication 2014 April. <https://www.macdonaldlaurier.ca/files/pdf/MLITheProvincialNorth04-14-Final.pdf> (accessed Aug 2021).
- [7] Ward K, Pousette A, Pelletier CA. Not Everybody’s an Athlete, But They Certainly Can Move”: Facilitators of Physical Activity Maintenance in Older Adults in a Northern and Rural Setting. *J Aging Phys Act* 2020;28:6: 854-863. doi:10.1123/japa.2019-0393.
- [8] Winterton, R., Warburton, J., Keating, N., Petersen, M., Berg, T., & Wilson, J. (2016). Understanding the influence of community characteristics on wellness for rural older adults: A meta-synthesis. *J Rural Stud*, 45, 320-327.
- [9] Northern Health Authority. (2015) Healthy Aging in the North: Action Plan. Northern Health Authority 2015. [https://www.northernhealth.ca/sites/northern\\_health/files/health-information/seniors/documents/healthy-aging-in-the-north-action-plan-2015.pdf](https://www.northernhealth.ca/sites/northern_health/files/health-information/seniors/documents/healthy-aging-in-the-north-action-plan-2015.pdf) (accessed Aug 2021).
- [10] Vedel I, Sheets D, McAiney C, et al. CCCDTD5: Individual and community-based psychosocial and other non-pharmacological interventions to support persons living with dementia and their caregivers. *Alzheimer's & Dementia: Translational Research & Clinical Interventions* 2020;6:1e12086. doi:10.1002/trc2.12086.
- [11] Alzheimer Society of Canada. Staying Physically active. <https://alzheimer.ca/en/help-support/im-living-dementia/living-well-dementia/staying-physically-active> (accessed Sep 2021).
- [12] Blankevoort CG, Van Heuvelen MJ, Boersma F, et al. Review of effects of physical activity on strength, balance, mobility and ADL performance in elderly subjects with dementia. *Dement Geriatr Cogn Disord* 2010;30:392–402. doi:10.1159/000321357.

- 1  
2  
3 [13] Eshkoor SA, Hamid, TA, Mun, CY, et al. (2015). Mild cognitive impairment and its  
4 management in older people. *Clin Interv Aging* 2015;10:687.  
5 doi:10.2145/CIA.S73922.  
6
- 7 [14] Ginis KA, Heisz J, Spence JC, et al. Formulation of evidence-based messages to  
8 promote the use of physical activity to prevent and manage Alzheimer's disease. *BMC*  
9 *Public Health* 2017;17:209. doi:10.1186/s12889-017-4090-5.  
10
- 11 [15] Erickson KI, Hillman C, Stillman CM, et al. Physical activity, cognition, and brain  
12 outcomes: a review of the 2018 physical activity guidelines. *Med Sci Sports Exerc*  
13 2019;51:6:1242. doi:10.1249/MSS.0000000000001936.  
14
- 15 [16] Malthouse R, Fox F. Exploring experiences of physical activity among people with  
16 Alzheimer's disease and their spouse carers: a qualitative study. *Physiotherapy*  
17 2014;100:169-175. doi:10.1016/j.physio.2013.10.002.  
18
- 19 [17] Cedervall Y, Torres S, Åberg AC. Maintaining well-being and selfhood through  
20 physical activity: experiences of people with mild Alzheimer's disease. *Aging Ment*  
21 *Health* 2015;19:8: 679-688. doi: 10.1080/13607863.2014.962004.  
22
- 23 [18] Kontos P, Grigorovich A, Dupuis S, et al. Raising the curtain on stigma associated  
24 with dementia: fostering a new cultural imaginary for a more inclusive society. *Crit*  
25 *Public Health* 2020;30:91-102. doi:10.1080/09581596.2018.1508822.  
26
- 27 [19] Hartman YAW, Karssemeijer EGA, Van Diepen LAM, et al. Dementia Patients Are  
28 More Sedentary and Less Physically Active than Age- and Sex-Matched Cognitively  
29 Healthy Older Adults. *Dement Geriatr Cogn Disord* 2018;46:81-89.  
30 doi:10.1159/000491995.  
31
- 32 [20] Laurin D, Verreault R, Lindsay J, et al. Physical activity and risk of cognitive  
33 impairment and dementia in elderly persons. *Arch Neurol* 2001;58:498-504.  
34 doi:10.1001/archneur.58.3.498.  
35
- 36 [21] Bowes A, Dawson A, Jepson R, et al. Physical activity for people with dementia: a  
37 scoping study. *BMC Geriatr* 2013;13:1-10. doi: 10.1186/1471-2318-13-129.  
38
- 39 [22] McLeroy KR, Bibeau D, Steckler A, et al. An ecological perspective on health  
40 promotion programs. *Health Educ Q* 1988;15:351-377  
41 doi:10.1177/109019818801500401.  
42
- 43 [23] Stubbs B, Eggermont L, Soundy A, et al. What are the factors associated with physical  
44 activity (PA) participation in community dwelling adults with dementia? A systematic  
45 review of PA correlates. *Arch Gerontol Geriatr* 2014;59:2:195-203. doi:  
46 10.1016/j.archger.2014.06.006.  
47
- 48 [24] Hancox JE, van der Wardt V, Pollock K, et al. Factors influencing adherence to home-  
49 based strength and balance exercises among older adults with mild cognitive  
50 impairment and early dementia: promoting activity, independence and stability in early  
51 dementia (PrAISED). *PLoS one* 2019;14:e0217387.  
52 <https://doi.org/10.1371/journal.pone.0217387>.  
53
- 54 [25] Dening T, Thomas A. Oxford textbook of old age psychiatry. Oxford University Press  
55 2013:1-823.  
56  
57  
58  
59

- 1  
2  
3 [26] van Alphen HJ, Hortobagyi T, van Heuvelen MJ. Barriers, motivators, and facilitators  
4 of physical activity in dementia patients: a systematic review. *Arch Gerontol Geriatr*  
5 2016;66:109-118. doi:10.1016/j.archger.2016.05.008.  
6  
7 [27] Hobson N, Dupuis SL, Giangregorio LM, et al. Perceived Facilitators and Barriers to  
8 Exercise Among Older Adults With Mild Cognitive Impairment and Early Dementia.  
9 *J Aging Phys Act* 2020;28:2:208-218. doi:10.1123/japa.2019-0010.  
10  
11 [28] Bechard LE, McDougall A, Mitchell C, et al. Dementia and mild cognitive impairment  
12 inclusive exercise: perceptions, experiences, and needs of community exercise  
13 providers. *PLOS ONE* 2020;15: e0238187. doi:[10.1371/journal.pone.0238187](https://doi.org/10.1371/journal.pone.0238187).  
14  
15 [29] Canadian Institutes of Health Research. Strategy for Patient-Oriented Research:  
16 Patient Engagement Framework. [https://cihr-irsc.gc.ca/e/documents/spor\\_framework-](https://cihr-irsc.gc.ca/e/documents/spor_framework-en.pdf)  
17 [en.pdf](https://cihr-irsc.gc.ca/e/documents/spor_framework-en.pdf) (accessed Sept 2021).  
18  
19 [30] Rural Coordination Centre of BC. Rural Practice Subsidiary Agreement.  
20 <https://rccbc.ca/rccbc/about-the-jsc/rsa-communities/> (accessed Sept 2021).  
21  
22 [31] Polit DF, Beck CT. *Nursing research: Principles and methods*. Lippincott Williams &  
23 Wilkins 2004;729.  
24  
25 [32] Braun, V., & Clarke, V. (2013). *Successful qualitative research: A practical guide for*  
26 *beginners*. Sage.  
27  
28 [33] Denzin, N. K., & Lincoln, Y. S. (Eds.). (2011). *The Sage handbook of qualitative*  
29 *research*. Sage.  
30  
31 [34] Morgan DL. *Planning and research design for focus groups. Focus groups as*  
32 *qualitative research* 1997;16.  
33  
34 [35] Wong LP. Focus group discussion: a tool for health and medical research. *Singapore*  
35 *Med J* 2008;49:256-60.  
36  
37 [36] Tausch AP, Menold N. Methodological aspects of focus groups in health research:  
38 results of qualitative interviews with focus group moderators. *Glob Qual Nurs Res*  
39 2016;3: doi:10.1177/2333393616630466.  
40  
41 [37] Clarke V, Braun V. *Thematic analysis*. In Encyclopedia of critical psychology.  
42 Springer New York NY 2014;1947-1952.  
43  
44 [38] Braun V, Clarke V. *Using thematic analysis in psychology. Qual Res Psychol*  
45 2006;3:2:77-101. doi: 10.1191/1478088706qp063oa.  
46  
47 [39] Spence JC, Lee RE. (2003). Toward a comprehensive model of physical activity.  
48 *Psychol Sport Exerc* 2003;4:7-24. doi: 10.1016/S1469-0292(02)00014-6.  
49  
50 [40] Morgan, D. G., Semchuk, K. M., Stewart, N. J., & D'arcy, C. (2002). Rural families  
51 caring for a relative with dementia: barriers to use of formal services. *Social science &*  
52 *medicine*, 55(7), 1129-1142.  
53  
54 [41] Pelletier CA, White N, Duchesne A, et al. Barriers to physical activity for adults in  
55 rural and urban Canada: A cross-sectional comparison. *SSM Population Health*  
56 2021;6:100964. doi: [10.1016/j.ssmph.2021.100964](https://doi.org/10.1016/j.ssmph.2021.100964).  
57  
58  
59

- 1  
2  
3 [42] Gansefort, D., Brand, T., Princk, C., & Zeeb, H. (2018). Community readiness for the  
4 promotion of physical activity in older adults—A cross-sectional comparison of rural  
5 and urban communities. *International journal of environmental research and public  
6 health, 15*(3), 453.  
7  
8 [43] Nykiforuk Candace, I. J., Kayla, A., Sara, B., Wayne, C., Tracey, G., Jason, G., ... &  
9 Jonathan, M. (2018). Evidence synthesis Promotion of physical activity in rural,  
10 remote and northern settings: a Canadian call to action. *Health Promotion and Chronic  
11 Disease Prevention in Canada: Research, Policy and Practice, 38*(11), 419.  
12  
13 [44] Di Sebastiano, K. M., Chulak-Bozzer, T., Vanderloo, L. M., & Faulkner, G. (2020).  
14 Don't walk so close to me: physical distancing and adult physical activity in  
15 Canada. *Frontiers in Psychology, 1895*.  
16  
17 [45] Gierc, M., Riazi, N. A., Fagan, M. J., Di Sebastiano, K. M., Kandola, M., Priebe, C.  
18 S., ... & Faulkner, G. (2021). Strange days: adult physical activity and mental health in  
19 the first two months of the COVID-19 pandemic. *Frontiers in Public Health, 9*, 325.  
20  
21 [46] Bacsu, J. D. R., O'Connell, M. E., Webster, C., Poole, L., Wighton, M. B., &  
22 Sivananthan, S. (2021). A scoping review of COVID-19 experiences of people living  
23 with dementia. *Canadian Journal of Public Health, 112*(3), 400-411.  
24  
25 [47] Müller, P., Achraf, A., Zou, L., Apfelbacher, C., Erickson, K. I., & Müller, N. G.  
26 (2020). COVID-19, physical (in-) activity, and dementia prevention. *Alzheimer's &  
27 Dementia: Translational Research & Clinical Interventions, 6*(1), e12091.  
28  
29  
30  
31  
32  
33  
34  
35  
36  
37  
38  
39  
40  
41  
42  
43  
44  
45  
46  
47  
48  
49  
50  
51  
52  
53  
54  
55  
56  
57  
58  
59  
60

Table 1: Identified challenges and mitigations strategies mapped to the social ecological model

| Level                             | Identified Challenges                                                                                                                                                                               | Mitigation Strategies                                                                                                                                                                                                                                                                                                                                                                                      |
|-----------------------------------|-----------------------------------------------------------------------------------------------------------------------------------------------------------------------------------------------------|------------------------------------------------------------------------------------------------------------------------------------------------------------------------------------------------------------------------------------------------------------------------------------------------------------------------------------------------------------------------------------------------------------|
| <b>Northern and Rural Context</b> | <ul style="list-style-type: none"> <li>• Winter weather and conditions</li> <li>• Inaccessible built environment</li> <li>• Lack of specialized facilities and distance to opportunities</li> </ul> | <ul style="list-style-type: none"> <li>• Appropriate clothing and footwear, knowledge on strategies for being active and staying safe (e.g., walking on ice to prevent falls)</li> <li>• Adjust to seasonal activities</li> <li>• Advocate for connected pathways and accessible sidewalks</li> <li>• Use public transit, share limited facilities between social and physical activity program</li> </ul> |
| <b>Health System</b>              | <ul style="list-style-type: none"> <li>• Fragmented Communication Process</li> <li>• Inconsistent Referral Process</li> </ul>                                                                       | <ul style="list-style-type: none"> <li>• Community champions leverage informal networks</li> <li>• Take advantage of gaps to allow flexibility in community-driven ground-up response (e.g., include persons identified to potentially benefit from support informally connected through personal and community networks in contrast to requiring formal referral from locum practitioner)</li> </ul>      |
| <b>Physical Activity Program</b>  | <ul style="list-style-type: none"> <li>• Balancing routine and structure with participant choice and autonomy</li> </ul>                                                                            | <ul style="list-style-type: none"> <li>• Flexibility to allow adjustment to cognitive and physical abilities of participants</li> <li>• Accommodation of diverse abilities in mixed classes and/or by team instruction</li> </ul>                                                                                                                                                                          |
|                                   | <ul style="list-style-type: none"> <li>• Lack of consistency in programming</li> </ul>                                                                                                              | <ul style="list-style-type: none"> <li>• Develop informal work-arounds through provider collaboration (e.g., job sharing, willingness to work outside scope of practice)</li> <li>• Program scheduling responsive to participant needs, offer when and where demand is high</li> <li>• Engagement of volunteers</li> </ul>                                                                                 |
|                                   | <ul style="list-style-type: none"> <li>• Lack of definition of program, and meaning of physical activity and exercise</li> </ul>                                                                    | <ul style="list-style-type: none"> <li>• Allow for flexibility in program provision (switch from physical to psychosocial goals when formal exercise provider unavailable)</li> <li>• Accept that no one program is everything to everyone</li> </ul>                                                                                                                                                      |
|                                   | <ul style="list-style-type: none"> <li>• Lack of accessibility to reliable information source</li> </ul>                                                                                            | <ul style="list-style-type: none"> <li>• Knowledge sharing occurs within community social network</li> <li>• Maintain traditional communication strategies (mail out of print activity book, person to person telephone connection)</li> </ul>                                                                                                                                                             |
|                                   | <ul style="list-style-type: none"> <li>• Lack of resources</li> </ul>                                                                                                                               | <ul style="list-style-type: none"> <li>• Education and training provided by multiple sources</li> </ul>                                                                                                                                                                                                                                                                                                    |



1  
2  
3  
4  
5  
6  
7  
8  
9  
10  
11  
12  
13  
14  
15  
16  
17  
18  
19  
20  
21  
22  
23  
24  
25  
26  
27  
28  
29  
30  
31  
32  
33  
34  
35  
36  
37  
38  
39  
40  
41  
42  
43  
44  
45  
46  
47

|                            |                                                                                                                                                                                                                                                                                                                                                                                                                                                                               |
|----------------------------|-------------------------------------------------------------------------------------------------------------------------------------------------------------------------------------------------------------------------------------------------------------------------------------------------------------------------------------------------------------------------------------------------------------------------------------------------------------------------------|
|                            | <ul style="list-style-type: none"> <li>• Flexible and adaptable job roles and volunteer engagement to address human resource capacity</li> <li>• Provider collaboration and sharing of limited resources across programs</li> </ul>                                                                                                                                                                                                                                           |
| <b>Program Participant</b> | <ul style="list-style-type: none"> <li>• Stigma of dementia</li> </ul> <ul style="list-style-type: none"> <li>• Offer program in neutral community location</li> <li>• Modify language to describe program to enhance inclusion for persons with dementia</li> <li>• Improve knowledge of benefits of exercise by participant and/or care partner</li> </ul>                                                                                                                  |
|                            | <ul style="list-style-type: none"> <li>• Perception of safety</li> </ul> <ul style="list-style-type: none"> <li>• Acknowledge fear and provide tailored programming support</li> <li>• Education and training on risk</li> <li>• Confidence and trust in program providers</li> </ul>                                                                                                                                                                                         |
|                            | <ul style="list-style-type: none"> <li>• Scheduling priorities</li> </ul> <ul style="list-style-type: none"> <li>• Participant and/or care partner awareness of program availability and benefits</li> <li>• Multiple programming options</li> <li>• Flexibility among community health providers to accommodate participant scheduling needs</li> <li>• Participants and care partners perceive physical activity as meaningful</li> <li>• Transportation support</li> </ul> |



**Program Participant Level**

- Motivation and knowledge
- Fear

**Physical Activity Programing Level**

- Program definition
- Balancing expectations

**Health System**

- Referral capacity
- Communication
- Limited resources

**Rural & Northern Context**

- Natural environment
- Built environment

1  
2  
3  
4  
5  
6  
7  
8  
9  
10  
11  
12  
13  
14  
15  
16  
17  
18  
19  
20  
21  
22  
23  
24  
25  
26  
27  
28  
29  
30  
31  
32  
33  
34  
35  
36  
37  
38  
39  
40  
41

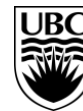

Expanding Exercise Opportunities for Persons living with dementia

**(FOCUS GROUP DISCUSSION SCRIPT AND QUESTIONS)**

PERSONS WITH MCI/DEMENCIA *Start with some icebreakers to get the group more acquainted with one another.*

1. What does the word exercise mean to you?
2. Do you feel that physical activity is different from exercise, and if so how?
3. What are some exercises that you do?
  - a. Potential prompts:
    - i. Where do you do these exercises?
    - ii. Who do you do these exercises with?
    - iii. How often do you do these exercises?
    - iv. What time of day do you prefer to exercise?
4. Tell me about the things that you do that would be considered physical activity?
  - a. Potential prompts:
    - i. Where do you do this?
    - ii. With who?
    - iii. How often?
5. Do you have any ideas about how physical activity or exercise might affect your health?
  - a. Potential prompts:
    - i. Effects on heart health
    - ii. Effects on bone or joint health?
    - iii. Effects on sleep?
    - iv. Effects on mood?
6. Do you have any ideas about how physical activity or exercise might affect your thinking ability?
7. From your perspective, are there any risks you are worried about from doing physical activity or exercise?
8. Tell me about any additional physical activity or exercise that you would like to do but are not doing now.

Prompts:

  - a. What type of physical activity or exercise?
  - b. Where would you like to do the physical activity or exercise?
  - c. Who would you like to do the physical activity or exercise with?
  - d. How much would you like to exercise?

1  
2  
3 9. What would help you get more physically active?  
4

5  
6 10. What gets in the way of you doing physical activity or exercise?  
7

8 11. Who do you look to for advice about the things you can do to improve your health?  
9

10 12. Who do you look to for advice about physical activity and exercise?  
11  
12  
13  
14  
15  
16  
17  
18  
19  
20  
21  
22  
23  
24  
25  
26  
27  
28  
29  
30  
31  
32  
33  
34  
35  
36  
37  
38  
39  
40  
41  
42  
43  
44  
45  
46  
47  
48  
49  
50  
51  
52  
53  
54  
55  
56  
57  
58  
59  
60

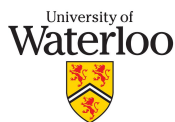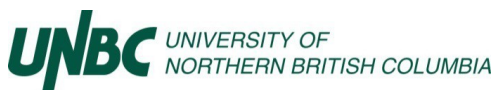

Expanding Exercise Opportunities for Persons living with dementia

**(FOCUS GROUP DISCUSSION SCRIPT AND QUESTIONS)**

---

ALLIED HEALTH PROFESSIONALS WHO PROVIDE SERVICES TO PEOPLE WITH MCI/DEMENCIA

---

1. What is your role in the health and wellbeing of people with dementia?
2. What is your role in prescribing or suggesting exercise to people with dementia?
3. What do you know about the benefits of physical activity and exercise to the health of people with dementia?
4. What do you know about the benefits of physical activity and exercise to the thinking ability of people with dementia?
5. Tell me about how you currently talk about and prescribe or suggest exercise to people with dementia?  
Prompts:
  - a. Do you discuss their current exercise habits?
  - b. Do you suggest exercise for people with dementia?
  - c. Do you suggest specific frequencies or intensities of exercise?
  - d. Do you refer people with dementia to specific people or programs?
6. What are the barriers to discussing and prescribing/suggesting exercise to people with dementia?
7. What would you need in order to better discuss and prescribe/suggest exercise to people with dementia?
8. Who should be discussing and prescribing/suggesting exercise to people with dementia?  
Prompts: Physician, nurse, PT/OT, kinesiologist or CEP, trainer, other?
9. Describe the ideal physical activity or exercise program for people with dementia.
  - a. Where would the physical activity or exercise take place?
  - b. Who would the person with dementia do the physical activity or exercise with?
  - c. How often would the person with dementia do this physical activity or exercise?
  - d. When should the physical activity or exercise take place?
  - e. Should exercise programs for people with dementia require referral or be open to all?
10. What are some challenges for people with dementia to be physically active?
11. What do you think would make it easier for people with dementia to be physically active?

**Supplementary File 1:** Author response to consolidated criteria for reporting qualitative studies (COREQ): 32-item checklist

| No                                             | Item                                     | Author Response                                                                                                                                                                                                                                                                                                                                               |
|------------------------------------------------|------------------------------------------|---------------------------------------------------------------------------------------------------------------------------------------------------------------------------------------------------------------------------------------------------------------------------------------------------------------------------------------------------------------|
| <b>Domain 1: Research team and reflexivity</b> |                                          |                                                                                                                                                                                                                                                                                                                                                               |
| Personal Characteristics                       |                                          |                                                                                                                                                                                                                                                                                                                                                               |
| 1.                                             | Interviewer/facilitator                  | SF conducted all interviews. p. 8                                                                                                                                                                                                                                                                                                                             |
| 2.                                             | Credentials                              | SF has a PhD and is experienced in conducting qualitative research.                                                                                                                                                                                                                                                                                           |
| 3.                                             | Occupation                               | SF is an Associate Professor in the School of Nursing at UNBC.                                                                                                                                                                                                                                                                                                |
| 4.                                             | Gender                                   | Female                                                                                                                                                                                                                                                                                                                                                        |
| 5.                                             | Experience and training                  | SF has previous training in qualitative research and has completed multiple qualitative research studies. p. 8                                                                                                                                                                                                                                                |
| Relationship with participants                 |                                          |                                                                                                                                                                                                                                                                                                                                                               |
| 6.                                             | Relationship established                 | None                                                                                                                                                                                                                                                                                                                                                          |
| 7.                                             | Participant knowledge of the interviewer | The participants knew that the interviews and focus groups were being conducted to learn from participants about their perspectives and experiences with exercise involving persons with dementia.                                                                                                                                                            |
| 8.                                             | Interviewer characteristics              | None                                                                                                                                                                                                                                                                                                                                                          |
| <b>Domain 2: study design</b>                  |                                          |                                                                                                                                                                                                                                                                                                                                                               |
| Theoretical framework                          |                                          |                                                                                                                                                                                                                                                                                                                                                               |
| 9.                                             | Methodological orientation and Theory    | Thematic analysis guided by Braun and Clarke's 6 steps (see p.7-8).<br>-- Clarke V, Braun V. Thematic analysis. In Encyclopedia of critical psychology. Springer New York NY 2014;1947-1952.<br>-- Braun V, Clarke V. Using thematic analysis in psychology. Qual Res Psychol 2006;3:2:77-101. doi: 10.1191/1478088706qp063oa.                                |
| Participant selection                          |                                          |                                                                                                                                                                                                                                                                                                                                                               |
| 10.                                            | Sampling                                 | Purposive, non-probability sampling, p. 6                                                                                                                                                                                                                                                                                                                     |
| 11.                                            | Method of approach                       | Snowball approach - E-mail, posters, word of mouth, p. 6                                                                                                                                                                                                                                                                                                      |
| 12.                                            | Sample size                              | 29 p. 6                                                                                                                                                                                                                                                                                                                                                       |
| 13.                                            | Non-participation                        | 0                                                                                                                                                                                                                                                                                                                                                             |
| Setting                                        |                                          |                                                                                                                                                                                                                                                                                                                                                               |
| 14.                                            | Setting of data collection               | Rural and medium sized city in Western Canada p. 7                                                                                                                                                                                                                                                                                                            |
| 15.                                            | Presence of non-participants             | No                                                                                                                                                                                                                                                                                                                                                            |
| 16.                                            | Description of sample                    | Healthcare professionals (e.g., physiotherapists, rehabilitation assistants, registered nurses; n=8); allied health providers experienced in providing community exercise programs (n=12); persons living with mild to moderate dementia or cognitive impairment (n=4); and care partners of persons living with dementia or cognitive impairment (n=5). p. 6 |
| Data collection                                |                                          |                                                                                                                                                                                                                                                                                                                                                               |
| 17.                                            | Interview guide                          | Interview guide was reviewed by diverse team of stakeholders including health care professionals, allied health providers, researchers, persons with dementia, and care partners of persons living with dementia. P. 7                                                                                                                                        |
| 18.                                            | Repeat interviews                        | No                                                                                                                                                                                                                                                                                                                                                            |
| 19.                                            | Audio/visual recording                   | Audio recording was done p. 7                                                                                                                                                                                                                                                                                                                                 |

|     |                      |                                            |
|-----|----------------------|--------------------------------------------|
| 20. | Field notes          | Field notes were taken p. 7                |
| 21. | Duration             | Interviews lasted between 1 - 2 hours p. 7 |
| 22. | Data saturation      | Yes                                        |
| 23. | Transcripts returned | No                                         |

| No                                     | Item                           | Author Response        |
|----------------------------------------|--------------------------------|------------------------|
| <b>Domain 3: analysis and findings</b> |                                |                        |
| Data analysis                          |                                |                        |
| 24.                                    | Number of data coders          | 3                      |
| 25.                                    | Description of the coding tree | No                     |
| 26.                                    | Derivation of themes           | Derived from data p. 9 |
| 27.                                    | Software                       | Excel, Word p. 9       |
| 28.                                    | Participant checking           | No                     |
| Reporting                              |                                |                        |
| 29.                                    | Quotations presented           | Yes p. 10-20           |
| 30.                                    | Data and findings consistent   | Yes p. 9-20            |
| 31.                                    | Clarity of major themes        | Yes p. 9-20            |
| 32.                                    | Clarity of minor themes        | Yes p. 9-20            |
